# Supplementary material for: Functionalization and antioxidant activity of polyaniline–fullerene hybrid nanomaterials: a theoretical investigation
Source: Royal Society of Chemistry journal article supplement (doi:10.1039/d0ra00903b), 2020-01-01
Supplement: d0ra00903b1.pdf [file d0ra00903b1.pdf]

# Electronic Supplementary Information (ESI)

---

## Functionalization and Antioxidant Activity of Polyaniline-fullerene Hybrid Nanomaterials: A Theoretical Investigation

Nguyen Minh Thong<sup>1,\*</sup>, Quan V. Vo<sup>2</sup>, Trinh Le Huyen<sup>3</sup>, Mai Van Bay<sup>4</sup>, Nguyen Nho Dung<sup>5</sup>,  
Pham Thi Thu Thao<sup>6,7</sup>, Pham Cam Nam<sup>6,\*</sup>

<sup>1</sup>The University of Danang, Campus in Kon Tum, 704 Phan Dinh Phung, Kon Tum, Vietnam

<sup>2</sup>The University of Danang, University of Technology and Education, 48 Cao Thang, Danang 550000, Vietnam

<sup>3</sup>Department of Applied Chemistry, National Chiao Tung University, Hsinchu 30010, Taiwan

<sup>4</sup>The University of Danang, University of Science and Education, Vietnam

<sup>5</sup>Danang University of Physical Education and Sports

<sup>6</sup>Department of Chemical Engineering, The University of Danang, University of Science and Technology, 54 Nguyen Luong Bang, Danang City, Vietnam.

<sup>7</sup>Department of Chemistry, Hue University of Science, 77 Nguyen Hue, Hue city, Vietnam.

\*Corresponding author: nmthong@kontum.udn.vn; pcnam@dut.udn.vn.

### List of supporting information:

**Figure S1:** The IRC plots for all transition states related to reaction of fullerene with aniline at the ONIOM-GD3(B3LYP/6-31G(d):PM6) level of theory in the gas phase.

**Table S1:** Energy barriers ( $E_a$  - kcal/mol) and imaginary vibrational frequency ( $\text{cm}^{-1}$ ) of all transition states related to reaction of fullerene with aniline and polyaniline at the ONIOM-GD3(B3LYP/6-31G(d):PM6) method.

**Table S2:** Energies (in Hartree) of all species related to reaction of fullerene with aniline and polyaniline at the ONIOM-GD3(B3LYP/6-31G(d):PM6) level of theory in the gas phase.

**Table S3:** Calculated BDE at B3LYP and B3LYP-GD3 level of theory

**Table S4:** Calculated IE and EA at B3LYP and B3LYP-GD3 level of theory

**Table S5:** Cartesian coordinates of all species were calculated at B3LYP/6-311++G(d,p)//B3LYP/6-31G(d) level of theory in the gas phase.

**Figure S1:** The IRC plots for all transition states related to reaction of fullerene with aniline at the ONIOM-GD3(B3LYP/6-31G(d):PM6) level of theory in the gas phase

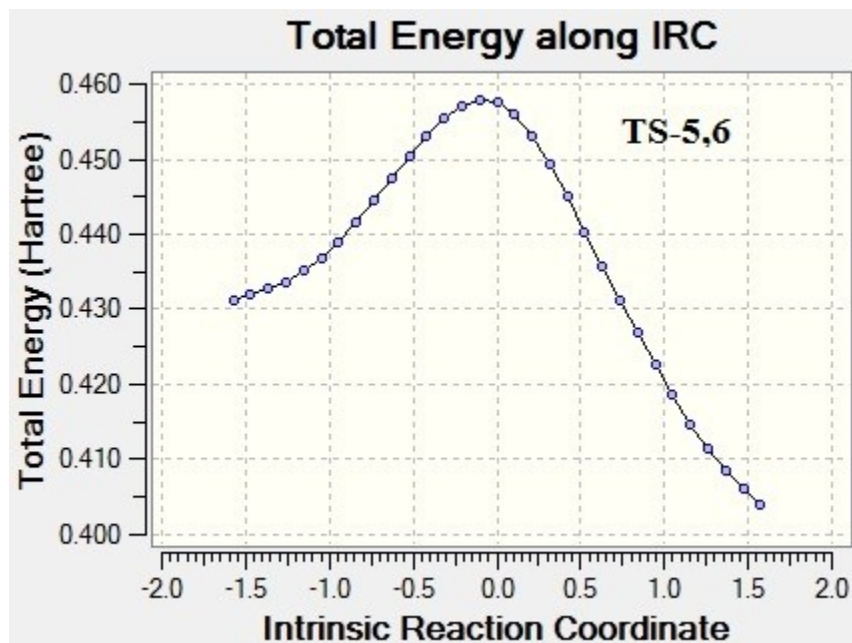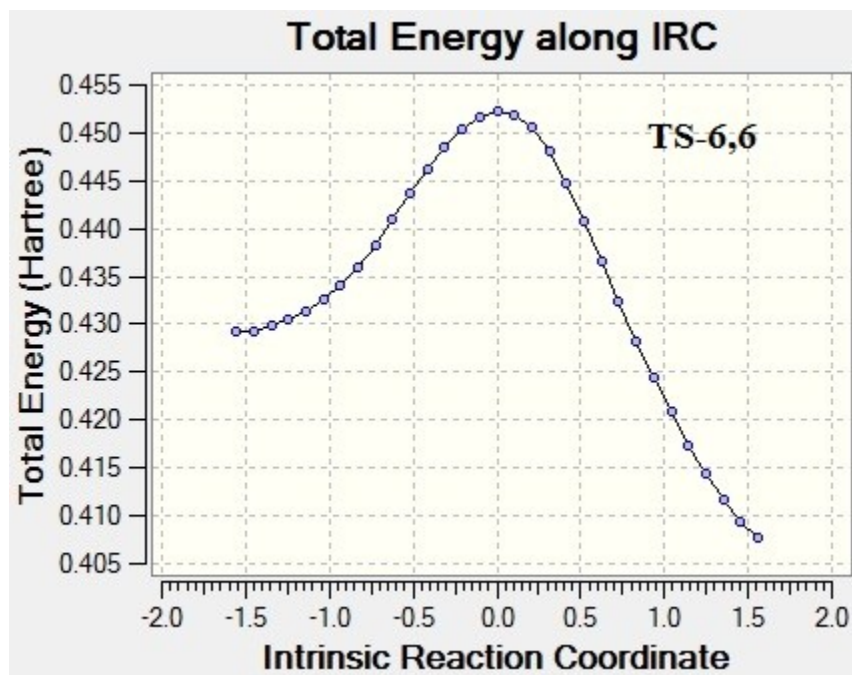

**Table S1:** Energy barriers ( $E_a$  - kcal/mol) and imaginary vibrational frequency ( $\text{cm}^{-1}$ ) of all transition states related to reaction of fullerene with aniline and polyaniline at the ONIOM-GD3(B3LYP/6-31G(d):PM6) method.

| <b>Species</b>              | <b>E<sub>a</sub></b> | <b>Imaginary frequency</b> |
|-----------------------------|----------------------|----------------------------|
| <b>TS(5,6)</b>              | 48.1                 | 1841.78i                   |
| <b>TS(6,6)</b>              | 36.8                 | 1754.82i                   |
| <b>TS-C<sub>60</sub>-E1</b> | 35.8                 | 1763.45i                   |
| <b>TS-C<sub>60</sub>-E2</b> | 38.5                 | 1816.70i                   |
| <b>TS-C<sub>60</sub>-L1</b> | 35.0                 | 1758.78i                   |
| <b>TS-C<sub>60</sub>-L2</b> | 35.4                 | 1815.84i                   |

**Table S2:** Energies (in Hartree) of all species related to reaction of fullerene with aniline and polyaniline at the ONIOM-GD3(B3LYP/6-31G(d):PM6) level of theory in the gas phase

| <b>Species</b>                                     | <b>Energies<sup>*</sup></b> | <b>Species</b>               | <b>Energies<sup>*</sup></b> |
|----------------------------------------------------|-----------------------------|------------------------------|-----------------------------|
| <b>C<sub>60</sub></b>                              | -536.785058                 | <b>Int-C<sub>60</sub>-L1</b> | -1683.207204                |
| <b>Aniline</b>                                     | -287.484207                 | <b>Int-C<sub>60</sub>-L2</b> | -1683.206417                |
| <b>Int</b>                                         | -824.275667                 | <b>TS-C<sub>60</sub>-E1</b>  | -1681.932314                |
| <b>TS(5,6)</b>                                     | -824.198926                 | <b>TS-C<sub>60</sub>-E2</b>  | -1681.927905                |
| <b>TS(6,6)</b>                                     | -824.216980                 | <b>TS-C<sub>60</sub>-L1</b>  | -1683.151415                |
| <b>P(5,6)</b>                                      | -824.253468                 | <b>TS-C<sub>60</sub>-L2</b>  | -1683.149901                |
| <b>P(6,6)</b>                                      | -824.277023                 | <b>P-C<sub>60</sub>-E1</b>   | -1681.989349                |
| <b>PANI-L</b>                                      | -1146.414446                | <b>P-C<sub>60</sub>-E2</b>   | -1681.985535                |
| <b>PANI-E</b>                                      | -1145.198447                | <b>P-C<sub>60</sub>-L1</b>   | -1683.207131                |
| <b>Int-C<sub>60</sub>-E1</b>                       | -1681.989375                | <b>P-C<sub>60</sub>-L2</b>   | -1683.206145                |
| <b>Int-C<sub>60</sub>-E2</b>                       | -1681.989234                |                              |                             |
| <i>* Sum of electronic and zero-point Energies</i> |                             |                              |                             |

**Table S3:** Calculated BDE at B3LYP and B3LYP-GD3 level of theory

| Compounds     | BDE(N–H) (kcal/mol) |           |                        | Compounds     | BDE(N–H) (kcal/mol) |           |                        |
|---------------|---------------------|-----------|------------------------|---------------|---------------------|-----------|------------------------|
|               | B3LYP               | B3LYP-GD3 | Deviation <sup>a</sup> |               | B3LYP               | B3LYP-GD3 | Deviation <sup>a</sup> |
| <b>PANI-L</b> |                     |           |                        | <b>C60-L2</b> |                     |           |                        |
| N1–H          | 85.09               | 85.56     | 0.47                   | N1–H          | 89.78               | 90.48     | 0.70                   |
| N2–H          | 78.04               | 78.86     | 0.82                   | N3–H          | 79.75               | 80.34     | 0.59                   |
| N3–H          | 78.10               | 78.92     | 0.82                   | N4–H          | 81.14               | 81.73     | 0.59                   |
| N4–H          | 79.92               | 80.62     | 0.70                   | <b>C60-E1</b> |                     |           |                        |
| <b>PANI-E</b> |                     |           |                        | N1–H          | 83.86               | 84.78     | 0.92                   |
| N1–H          | 86.83               | 87.28     | 0.45                   | N2–H          | 78.93               | 79.79     | 0.86                   |
| N2–H          | 78.66               | 79.44     | 0.78                   | <b>C60-E2</b> |                     |           |                        |
| <b>C60-L1</b> |                     |           |                        | N1–H          | 90.88               | 91.48     | 0.60                   |
| N1–H          | 81.85               | 82.83     | 0.98                   |               |                     |           |                        |
| N2–H          | 78.14               | 79.00     | 0.86                   |               |                     |           |                        |
| N3–H          | 78.31               | 79.19     | 0.88                   |               |                     |           |                        |
| N4–H          | 80.21               | 80.98     | 0.77                   |               |                     |           |                        |

<sup>a</sup>Values (B3LYP-GD3/6-311++G(d,p)// B3LYP-GD3/6-31G(d)) – values (B3LYP/6-311++G(d,p)// B3LYP /6-31G(d))

**Table S4:** Calculated IE and EA at B3LYP and B3LYP-GD3 level of theory

| Compounds     | Adiabatic IE (kcal/mol) |           |                        | Adiabatic EA (kcal/mol) |           |                        |
|---------------|-------------------------|-----------|------------------------|-------------------------|-----------|------------------------|
|               | B3LYP                   | B3LYP-GD3 | Deviation <sup>a</sup> | B3LYP                   | B3LYP-GD3 | Deviation <sup>a</sup> |
| <b>PANI-L</b> | 130.36                  | 130.46    | 0.10                   | 0.58                    | 0.56      | -0.02                  |
| <b>PANI-E</b> | 140.74                  | 140.83    | 0.09                   | 45.62                   | 45.54     | -0.08                  |
| <b>C60-L1</b> | 130.98                  | 131.22    | 0.24                   | 65.10                   | 65.06     | -0.04                  |
| <b>C60-L2</b> | 133.97                  | 133.77    | -0.20                  | 61.74                   | 61.93     | 0.19                   |
| <b>C60-E1</b> | 140.56                  | 140.7     | 0.14                   | 66.46                   | 66.33     | -0.13                  |
| <b>C60-E2</b> | 143.84                  | 143.8     | -0.04                  | 65.18                   | 65.11     | -0.07                  |

<sup>a</sup>Values (B3LYP-GD3/6-311++G(d,p)// B3LYP-GD3/6-31G(d)) – values (B3LYP/6-311++G(d,p)// B3LYP /6-31G(d))

**Table S5:** Cartesian coordinates of all species were calculated at B3LYP/6-311++G(d,p)//B3LYP/6-31G(d) level of theory in the gas phase.

| Name of compound                                  | PANI-L      |             |             |
|---------------------------------------------------|-------------|-------------|-------------|
| Cartesian Coordinates optimized at B3LYP/6-31G(d) |             |             |             |
| C                                                 | -4.27091100 | -0.49629000 | -0.13130600 |
| C                                                 | -3.11733200 | -0.82695100 | -0.85731500 |
| C                                                 | -1.84494200 | -0.51007000 | -0.39030700 |
| C                                                 | -1.67918900 | 0.16444100  | 0.83124300  |
| C                                                 | -2.83661500 | 0.49658500  | 1.55830500  |
| C                                                 | -4.10549100 | 0.17108900  | 1.09354300  |
| H                                                 | -3.21907800 | -1.32833100 | -1.81759000 |
| H                                                 | -0.97959900 | -0.75734400 | -0.99490000 |
| H                                                 | -2.73498300 | 0.99957500  | 2.51782200  |
| H                                                 | -4.97286000 | 0.41024200  | 1.69962400  |
| N                                                 | -5.52989500 | -0.89864100 | -0.61325600 |
| H                                                 | -5.52817100 | -1.72956200 | -1.18718100 |
| N                                                 | -0.43241100 | 0.54587800  | 1.33735900  |
| H                                                 | -0.44439600 | 1.33877500  | 1.96252300  |
| C                                                 | 0.84279500  | 0.08247400  | 0.97603200  |
| C                                                 | 1.09223600  | -1.25230000 | 0.61408600  |
| C                                                 | 1.93850900  | 0.95707000  | 1.03910100  |
| C                                                 | 2.37700700  | -1.67102600 | 0.28904600  |
| H                                                 | 0.27694400  | -1.96775200 | 0.59416900  |
| C                                                 | 3.23228900  | 0.52838600  | 0.75743100  |
| H                                                 | 1.77578200  | 1.99353600  | 1.32790100  |
| C                                                 | 3.47578800  | -0.79542900 | 0.35510700  |
| H                                                 | 2.53924200  | -2.70502500 | -0.00873800 |
| H                                                 | 4.05682600  | 1.22588600  | 0.85385200  |
| N                                                 | 4.75034800  | -1.28938400 | 0.05034500  |
| C                                                 | 5.93333000  | -0.56456200 | -0.17595900 |
| C                                                 | 5.95497600  | 0.63239700  | -0.91054800 |
| C                                                 | 7.15843900  | -1.07648100 | 0.27849500  |
| C                                                 | 7.15243800  | 1.29818500  | -1.15474000 |
| H                                                 | 5.02994000  | 1.03448200  | -1.31053400 |
| C                                                 | 8.35815800  | -0.42460100 | 0.00951500  |
| H                                                 | 7.17082800  | -2.00169300 | 0.85102700  |
| C                                                 | 8.37786200  | 0.78378400  | -0.70318900 |
| H                                                 | 7.13797100  | 2.22817000  | -1.71948200 |
| H                                                 | 9.29104000  | -0.84854000 | 0.37517100  |
| N                                                 | 9.57729900  | 1.48830300  | -0.90416000 |
| H                                                 | 9.56729100  | 2.09254100  | -1.71792700 |
| C                                                 | -6.75282400 | -0.23103700 | -0.53847900 |
| C                                                 | -6.86864200 | 1.12761900  | -0.19181100 |
| C                                                 | -7.92550600 | -0.94375900 | -0.85658800 |

|                                          |              |             |             |
|------------------------------------------|--------------|-------------|-------------|
| C                                        | -8.12212800  | 1.73657700  | -0.15311100 |
| H                                        | -5.97873600  | 1.70808200  | 0.02364700  |
| C                                        | -9.16834600  | -0.31962200 | -0.82612300 |
| H                                        | -7.85114400  | -1.99638500 | -1.12297600 |
| C                                        | -9.28156400  | 1.02574400  | -0.46656200 |
| H                                        | -8.18611600  | 2.78838800  | 0.11510400  |
| H                                        | -10.05634400 | -0.89397500 | -1.07831700 |
| H                                        | -10.25324400 | 1.50958500  | -0.43419700 |
| H                                        | 4.87643000   | -2.27767200 | 0.21666200  |
| H                                        | 10.40296200  | 0.90059500  | -0.91288000 |
| Frequency and Energy at B3LYP/6-31G(d)   |              |             |             |
| Zero-point correction=                   |              |             | 0.409201    |
| (Hartree/Particle)                       |              |             |             |
| Thermal correction to Energy=            |              |             | 0.433518    |
| Thermal correction to Enthalpy=          |              |             | 0.434463    |
| Thermal correction to Gibbs Free Energy= |              |             | 0.350666    |
| Energy at B3LYP/6-311++G(d,p)            |              |             |             |
| HF= -1147.112052                         |              |             |             |

| Name of compound                                  |             | PANI-L-N1-H radical |             |
|---------------------------------------------------|-------------|---------------------|-------------|
| Cartesian Coordinates optimized at B3LYP/6-31G(d) |             |                     |             |
| C                                                 | -4.18529200 | -0.44077300         | -0.19230900 |
| C                                                 | -3.03463500 | -0.90820800         | -0.84875200 |
| C                                                 | -1.77504400 | -0.39194400         | -0.56411800 |
| C                                                 | -1.61739200 | 0.61757500          | 0.39951600  |
| C                                                 | -2.76668400 | 1.08445000          | 1.05649500  |
| C                                                 | -4.02693700 | 0.56955500          | 0.77106100  |
| H                                                 | -3.13350900 | -1.67539200         | -1.61369500 |
| H                                                 | -0.91480700 | -0.75032900         | -1.11917400 |
| H                                                 | -2.66796200 | 1.85157700          | 1.82156000  |
| H                                                 | -4.88681900 | 0.92995800          | 1.32455000  |
| N                                                 | -5.42148800 | -1.03558600         | -0.48132600 |
| H                                                 | -5.37531300 | -1.98649200         | -0.81821700 |
| N                                                 | -0.37680500 | 1.21206000          | 0.68275800  |
| H                                                 | -0.41861500 | 2.16435500          | 1.01661300  |
| C                                                 | 0.89374700  | 0.63521400          | 0.68087600  |
| C                                                 | 1.11270700  | -0.75322200         | 0.73486100  |
| C                                                 | 2.02102200  | 1.47811900          | 0.67141500  |
| C                                                 | 2.40541800  | -1.26540000         | 0.73611000  |
| H                                                 | 0.27021800  | -1.43352700         | 0.78400500  |
| C                                                 | 3.31100000  | 0.96468700          | 0.71274300  |
| H                                                 | 1.87882300  | 2.55642700          | 0.64727700  |
| C                                                 | 3.52687300  | -0.42290100         | 0.72141100  |
| H                                                 | 2.54914400  | -2.34342700         | 0.75776400  |
| H                                                 | 4.15583900  | 1.64401200          | 0.74928800  |
| N                                                 | 4.81378400  | -0.99199500         | 0.78370800  |
| C                                                 | 5.99513000  | -0.55222500         | 0.21331000  |
| C                                                 | 6.04273500  | 0.40691700          | -0.82836500 |
| C                                                 | 7.21629600  | -1.12049200         | 0.66448200  |
| C                                                 | 7.25008900  | 0.79107800          | -1.37079500 |
| H                                                 | 5.11898000  | 0.82003600          | -1.21822900 |
| C                                                 | 8.41935400  | -0.74238700         | 0.12163800  |
| H                                                 | 7.18766000  | -1.86016500         | 1.46282300  |

|                                          |              |             |             |
|------------------------------------------|--------------|-------------|-------------|
| C                                        | 8.50269800   | 0.24451900  | -0.92227600 |
| H                                        | 7.26464900   | 1.52084500  | -2.17794900 |
| H                                        | 9.35209300   | -1.17399700 | 0.47121000  |
| N                                        | 9.70492800   | 0.56947900  | -1.39477800 |
| H                                        | 9.59319500   | 1.27966200  | -2.12944700 |
| C                                        | -6.70699700  | -0.49226300 | -0.40508900 |
| C                                        | -6.95717600  | 0.89157800  | -0.42606500 |
| C                                        | -7.80369200  | -1.37297200 | -0.35152400 |
| C                                        | -8.26667500  | 1.36715300  | -0.37495700 |
| H                                        | -6.13157700  | 1.58953700  | -0.50798700 |
| C                                        | -9.10631700  | -0.88494700 | -0.31643600 |
| H                                        | -7.62324600  | -2.44592600 | -0.33154500 |
| C                                        | -9.35108000  | 0.49032800  | -0.31882000 |
| H                                        | -8.43678100  | 2.44077400  | -0.39430200 |
| H                                        | -9.93521100  | -1.58712300 | -0.27728900 |
| H                                        | -10.36763300 | 0.87035400  | -0.28134500 |
| H                                        | 4.88305100   | -1.84948300 | 1.31509300  |
| Frequency and Energy at B3LYP/6-31G(d)   |              |             |             |
| Zero-point correction=                   |              |             | 0.396781    |
| (Hartree/Particle)                       |              |             |             |
| Thermal correction to Energy=            |              |             | 0.420394    |
| Thermal correction to Enthalpy=          |              |             | 0.421338    |
| Thermal correction to Gibbs Free Energy= |              |             | 0.338865    |
| Energy at B3LYP/6-311++G(d,p)            |              |             |             |
| HF= -1146.468372                         |              |             |             |

| Name of compound                                  |             | PANI-L-N2-H radical |             |
|---------------------------------------------------|-------------|---------------------|-------------|
| Cartesian Coordinates optimized at B3LYP/6-31G(d) |             |                     |             |
| C                                                 | -4.22577200 | -0.44109200         | -0.19668400 |
| C                                                 | -3.09006200 | -0.91917100         | -0.87174300 |
| C                                                 | -1.81608000 | -0.44775600         | -0.57574200 |
| C                                                 | -1.62897600 | 0.52645200          | 0.41883400  |
| C                                                 | -2.76345200 | 1.00600400          | 1.09301700  |
| C                                                 | -4.03774800 | 0.53480700          | 0.79675800  |
| H                                                 | -3.21225900 | -1.65888500         | -1.65995800 |
| H                                                 | -0.96757000 | -0.81233200         | -1.14397800 |
| H                                                 | -2.64108100 | 1.74565300          | 1.88128700  |
| H                                                 | -4.88590400 | 0.90123900          | 1.36412300  |
| N                                                 | -5.47784200 | -0.99292300         | -0.50076100 |
| H                                                 | -5.45768900 | -1.93497900         | -0.86418000 |
| N                                                 | -0.37344600 | 1.07673000          | 0.72241700  |
| H                                                 | -0.39017200 | 2.02924500          | 1.05947000  |
| C                                                 | 0.88763200  | 0.49448400          | 0.65205400  |
| C                                                 | 1.09706100  | -0.90232700         | 0.62147800  |
| C                                                 | 2.02155200  | 1.33492200          | 0.67970800  |
| C                                                 | 2.37956300  | -1.41590200         | 0.58860900  |
| H                                                 | 0.24860700  | -1.57611500         | 0.66303100  |
| C                                                 | 3.30393200  | 0.81972800          | 0.62681100  |
| H                                                 | 1.87860700  | 2.41228500          | 0.74798600  |
| C                                                 | 3.53496100  | -0.58544000         | 0.54976100  |
| H                                                 | 2.54068200  | -2.48973600         | 0.58706400  |
| H                                                 | 4.14834100  | 1.49726600          | 0.69150200  |
| N                                                 | 4.74254500  | -1.21507000         | 0.54409900  |

|   |              |             |             |
|---|--------------|-------------|-------------|
| C | 5.90055900   | -0.62070100 | 0.13011600  |
| C | 6.02074300   | 0.44629800  | -0.80527000 |
| C | 7.11608300   | -1.19062200 | 0.60078500  |
| C | 7.25972300   | 0.92100300  | -1.20478300 |
| H | 5.12648400   | 0.85945000  | -1.25953400 |
| C | 8.35074500   | -0.69645200 | 0.22562500  |
| H | 7.04076400   | -2.02767000 | 1.28815100  |
| C | 8.44999400   | 0.37506400  | -0.68635600 |
| H | 7.31804400   | 1.72340700  | -1.93798000 |
| H | 9.25922600   | -1.14108800 | 0.62700800  |
| N | 9.69136100   | 0.90329200  | -1.03481800 |
| H | 9.72100500   | 1.40278800  | -1.91488300 |
| C | -6.74926400  | -0.42299500 | -0.39259300 |
| C | -6.96680000  | 0.96634600  | -0.36705100 |
| C | -7.86596000  | -1.27911000 | -0.35564900 |
| C | -8.26403600  | 1.47051200  | -0.28686500 |
| H | -6.12566500  | 1.64693300  | -0.43585800 |
| C | -9.15622900  | -0.76211800 | -0.29112800 |
| H | -7.71081000  | -2.35606200 | -0.37171500 |
| C | -9.36831000  | 0.61787100  | -0.24704400 |
| H | -8.40885700  | 2.54788800  | -0.27025200 |
| H | -10.00110200 | -1.44562600 | -0.26544100 |
| H | -10.37515400 | 1.02016200  | -0.18656800 |
| H | 10.47701800  | 0.27313900  | -0.93170700 |

Frequency and Energy at B3LYP/6-31G(d)

|                                          |          |
|------------------------------------------|----------|
| Zero-point correction=                   | 0.396953 |
| (Hartree/Particle)                       |          |
| Thermal correction to Energy=            | 0.420511 |
| Thermal correction to Enthalpy=          | 0.421455 |
| Thermal correction to Gibbs Free Energy= | 0.339881 |

Energy at B3LYP/6-311++G(d,p)

HF= -1146.479721

| Name of compound                                  |             | PANI-L-N3-H radical |             |
|---------------------------------------------------|-------------|---------------------|-------------|
| Cartesian Coordinates optimized at B3LYP/6-31G(d) |             |                     |             |
| C                                                 | -4.23648200 | -0.39580600         | -0.22222200 |
| C                                                 | -3.09808800 | -0.89837900         | -0.88553700 |
| C                                                 | -1.82397400 | -0.46355000         | -0.56339400 |
| C                                                 | -1.61244400 | 0.53138900          | 0.43336700  |
| C                                                 | -2.77654800 | 1.05430900          | 1.06017100  |
| C                                                 | -4.04663100 | 0.59020700          | 0.76936500  |
| H                                                 | -3.23086400 | -1.62885200         | -1.68170300 |
| H                                                 | -0.97854000 | -0.84212700         | -1.12784300 |
| H                                                 | -2.63319900 | 1.82000800          | 1.81643500  |
| H                                                 | -4.89827100 | 0.97588900          | 1.31836800  |
| N                                                 | -5.48546300 | -0.92323500         | -0.55093900 |
| H                                                 | -5.46452100 | -1.83755800         | -0.98076700 |
| N                                                 | -0.41734600 | 1.09411600          | 0.77971300  |
| C                                                 | 0.77983800  | 0.46431000          | 0.63986900  |
| C                                                 | 1.00668400  | -0.94386100         | 0.59203700  |
| C                                                 | 1.94197300  | 1.28804000          | 0.64408800  |
| C                                                 | 2.28436500  | -1.46289800         | 0.50042300  |
| H                                                 | 0.16568400  | -1.62352300         | 0.67626300  |



|   |              |             |             |
|---|--------------|-------------|-------------|
| C | 3.21826400   | 0.77271100  | 0.53096600  |
| H | 1.78885000   | 2.35921200  | 0.73464600  |
| C | 3.41977300   | -0.62381600 | 0.44138200  |
| H | 2.42476500   | -2.54261100 | 0.47819400  |
| H | 4.07250800   | 1.44019300  | 0.54722200  |
| N | 4.67479500   | -1.20862400 | 0.35643300  |
| C | 5.91484000   | -0.61321000 | 0.05182800  |
| C | 6.04928400   | 0.41161600  | -0.89801600 |
| C | 7.07776300   | -1.10092700 | 0.66673700  |
| C | 7.29913800   | 0.94474100  | -1.19619500 |
| H | 5.17333200   | 0.77996100  | -1.42130800 |
| C | 8.32971600   | -0.58588700 | 0.34875300  |
| H | 6.99775600   | -1.89392700 | 1.40697900  |
| C | 8.46408600   | 0.45740300  | -0.58159900 |
| H | 7.37530300   | 1.74400700  | -1.93025700 |
| H | 9.21378900   | -0.98310200 | 0.84256000  |
| N | 9.71378200   | 1.03436300  | -0.84397400 |
| H | 9.78619600   | 1.48467500  | -1.74859000 |
| C | -6.76281500  | -0.37442800 | -0.39024100 |
| C | -6.99797200  | 1.01042900  | -0.32529700 |
| C | -7.86419400  | -1.24909300 | -0.34591900 |
| C | -8.29946600  | 1.49251400  | -0.19534900 |
| H | -6.16901900  | 1.70432100  | -0.40462600 |
| C | -9.15967700  | -0.75385900 | -0.23254700 |
| H | -7.69294700  | -2.32259800 | -0.39296800 |
| C | -9.38902600  | 0.62138500  | -0.14642000 |
| H | -8.45998500  | 2.56660500  | -0.14819000 |
| H | -9.99395200  | -1.44992300 | -0.20128500 |
| H | -10.39951400 | 1.00676700  | -0.04792200 |
| H | 4.70931300   | -2.19312000 | 0.58203800  |
| H | 10.50250300  | 0.41932500  | -0.68336100 |

Frequency and Energy at B3LYP/6-31G(d)

|                                          |          |
|------------------------------------------|----------|
| Zero-point correction=                   | 0.397087 |
| (Hartree/Particle)                       |          |
| Thermal correction to Energy=            | 0.420603 |
| Thermal correction to Enthalpy=          | 0.421547 |
| Thermal correction to Gibbs Free Energy= | 0.340311 |

Energy at B3LYP/6-311++G(d,p)

HF= -1146.479718

| Name of compound                                  |             | PANI-L-N4-H radical |             |
|---------------------------------------------------|-------------|---------------------|-------------|
| Cartesian Coordinates optimized at B3LYP/6-31G(d) |             |                     |             |
| C                                                 | -4.32284300 | -0.41263500         | -0.33285600 |
| C                                                 | -3.12287300 | -0.87876200         | -0.95459700 |
| C                                                 | -1.86893900 | -0.53062100         | -0.50025400 |
| C                                                 | -1.72520100 | 0.28412200          | 0.64895700  |
| C                                                 | -2.90001300 | 0.73145600          | 1.30101800  |
| C                                                 | -4.15431600 | 0.40728700          | 0.82935200  |
| H                                                 | -3.23525000 | -1.50380400         | -1.83514900 |
| H                                                 | -0.98782700 | -0.86713100         | -1.03480500 |
| H                                                 | -2.80339700 | 1.32691700          | 2.20740800  |
| H                                                 | -5.02974600 | 0.73714700          | 1.37780600  |
| N                                                 | -5.48915500 | -0.84521200         | -0.85573000 |

|   |              |             |             |
|---|--------------|-------------|-------------|
| N | -0.49838700  | 0.67849100  | 1.15111200  |
| H | -0.52585000  | 1.44557100  | 1.80914500  |
| C | 0.78598500   | 0.17181200  | 0.86532600  |
| C | 1.03069200   | -1.19384000 | 0.64872500  |
| C | 1.88143700   | 1.04715800  | 0.86079500  |
| C | 2.31759700   | -1.64856000 | 0.39208200  |
| H | 0.21163700   | -1.90382800 | 0.69204000  |
| C | 3.17633900   | 0.58971700  | 0.64190200  |
| H | 1.71666900   | 2.10750300  | 1.03944200  |
| C | 3.41938000   | -0.77143000 | 0.38219300  |
| H | 2.48014900   | -2.70886300 | 0.21020400  |
| H | 4.00254800   | 1.29046800  | 0.67759500  |
| N | 4.69076600   | -1.29298100 | 0.14826100  |
| C | 5.89226300   | -0.59572500 | -0.08861500 |
| C | 5.95722400   | 0.52110100  | -0.93655000 |
| C | 7.08732900   | -1.06251800 | 0.47802200  |
| C | 7.16873700   | 1.15995500  | -1.18210500 |
| H | 5.05610800   | 0.88024600  | -1.42302400 |
| C | 8.30310700   | -0.44176300 | 0.20878100  |
| H | 7.06317800   | -1.92591200 | 1.13940800  |
| C | 8.36599200   | 0.69101600  | -0.61780500 |
| H | 7.18956700   | 2.02897800  | -1.83633600 |
| H | 9.21357300   | -0.82783000 | 0.66195600  |
| N | 9.57616700   | 1.36946100  | -0.82458300 |
| H | 9.61419400   | 1.89929300  | -1.68748000 |
| C | -6.70523400  | -0.26044100 | -0.57083500 |
| C | -6.91669000  | 1.12938800  | -0.38232600 |
| C | -7.84340200  | -1.10387600 | -0.57704200 |
| C | -8.19899400  | 1.63261000  | -0.18186100 |
| H | -6.07229400  | 1.80843300  | -0.44619800 |
| C | -9.11488900  | -0.59515700 | -0.34662000 |
| H | -7.68530200  | -2.16364000 | -0.75289300 |
| C | -9.30392000  | 0.77748100  | -0.14613700 |
| H | -8.33847300  | 2.70403300  | -0.05823400 |
| H | -9.96897200  | -1.26787400 | -0.33652300 |
| H | -10.30121700 | 1.17647800  | 0.01728200  |
| H | 4.79117100   | -2.28103400 | 0.33263300  |
| H | 10.40121100  | 0.78987500  | -0.72499000 |

Frequency and Energy at B3LYP/6-31G(d)

|                                          |          |
|------------------------------------------|----------|
| Zero-point correction=                   | 0.396819 |
| (Hartree/Particle)                       |          |
| Thermal correction to Energy=            | 0.420440 |
| Thermal correction to Enthalpy=          | 0.421384 |
| Thermal correction to Gibbs Free Energy= | 0.339603 |

Energy at B3LYP/6-311++G(d,p)

HF= -1146.476656

| Name of compound                                  | PANI-L-cation |             |             |
|---------------------------------------------------|---------------|-------------|-------------|
| Cartesian Coordinates optimized at B3LYP/6-31G(d) |               |             |             |
| C                                                 | -4.29721200   | 0.39121100  | 0.36303000  |
| C                                                 | -3.16242600   | 0.95336500  | 0.99581000  |
| C                                                 | -1.88445800   | 0.50996700  | 0.71286200  |
| C                                                 | -1.67991600   | -0.51805000 | -0.23064700 |

|                                          |              |             |             |
|------------------------------------------|--------------|-------------|-------------|
| C                                        | -2.80809400  | -1.08829700 | -0.85586700 |
| C                                        | -4.08721500  | -0.64783500 | -0.57432400 |
| H                                        | -3.30182500  | 1.72787400  | 1.74566500  |
| H                                        | -1.04642300  | 0.92481800  | 1.26076400  |
| H                                        | -2.66912900  | -1.86941200 | -1.59945400 |
| H                                        | -4.92866900  | -1.07968600 | -1.10186600 |
| N                                        | -5.54132200  | 0.89367600  | 0.66690500  |
| H                                        | -5.54588100  | 1.78268300  | 1.15048600  |
| N                                        | -0.42140100  | -1.03584700 | -0.53626600 |
| H                                        | -0.42791200  | -1.99044200 | -0.87718400 |
| C                                        | 0.82878500   | -0.45393400 | -0.46965100 |
| C                                        | 1.03724200   | 0.94492200  | -0.41961600 |
| C                                        | 1.96484500   | -1.29676900 | -0.51790000 |
| C                                        | 2.31657200   | 1.45733200  | -0.37003700 |
| H                                        | 0.19381700   | 1.62324700  | -0.45827000 |
| C                                        | 3.24442400   | -0.78543600 | -0.46904600 |
| H                                        | 1.82657100   | -2.37234600 | -0.59882900 |
| C                                        | 3.45337500   | 0.61199300  | -0.36952300 |
| H                                        | 2.45558800   | 2.53529800  | -0.33894800 |
| H                                        | 4.09086900   | -1.45726300 | -0.54031200 |
| N                                        | 4.70147300   | 1.18901500  | -0.33002200 |
| C                                        | 5.95512600   | 0.60996200  | -0.08142900 |
| C                                        | 6.13314300   | -0.48041700 | 0.79076700  |
| C                                        | 7.09147200   | 1.18780100  | -0.67892400 |
| C                                        | 7.39759000   | -0.99470600 | 1.02481300  |
| H                                        | 5.28412600   | -0.90002600 | 1.31897000  |
| C                                        | 8.35593600   | 0.68132300  | -0.44020900 |
| H                                        | 6.97344700   | 2.03520100  | -1.34991900 |
| C                                        | 8.53833400   | -0.43242700 | 0.41031100  |
| H                                        | 7.51619000   | -1.83139300 | 1.70800400  |
| H                                        | 9.21755300   | 1.13696300  | -0.92029500 |
| N                                        | 9.78428300   | -0.97009000 | 0.60942600  |
| H                                        | 9.92483100   | -1.61230600 | 1.37618400  |
| C                                        | -6.81824500  | 0.37159700  | 0.36014600  |
| C                                        | -7.08679300  | -1.00550500 | 0.38874400  |
| C                                        | -7.85576600  | 1.27466400  | 0.08261100  |
| C                                        | -8.37304900  | -1.46511300 | 0.11036200  |
| H                                        | -6.30568800  | -1.70718800 | 0.66135100  |
| C                                        | -9.14008700  | 0.80454000  | -0.17783800 |
| H                                        | -7.64790300  | 2.34166500  | 0.06056500  |
| C                                        | -9.40343800  | -0.56735700 | -0.17511000 |
| H                                        | -8.57297000  | -2.53236800 | 0.13806600  |
| H                                        | -9.93485300  | 1.51295000  | -0.39205100 |
| H                                        | -10.40422500 | -0.93227500 | -0.38422900 |
| H                                        | 4.72218300   | 2.18154600  | -0.53381200 |
| H                                        | 10.59820200  | -0.43180200 | 0.34879800  |
| Frequency and Energy at B3LYP/6-31G(d)   |              |             |             |
| Zero-point correction=                   |              |             | 0.411766    |
| (Hartree/Particle)                       |              |             |             |
| Thermal correction to Energy=            |              |             | 0.435323    |
| Thermal correction to Enthalpy=          |              |             | 0.436267    |
| Thermal correction to Gibbs Free Energy= |              |             | 0.355432    |
| Energy at B3LYP/6-311++G(d,p)            |              |             |             |
| HF= -1146.907313                         |              |             |             |

| Name of compound                                  | PANI-L-anion |             |             |
|---------------------------------------------------|--------------|-------------|-------------|
| Cartesian Coordinates optimized at B3LYP/6-31G(d) |              |             |             |
| C                                                 | -4.20381300  | -0.04639500 | -0.49562800 |
| C                                                 | -3.02358400  | 0.49571400  | -1.06245200 |
| C                                                 | -1.77035400  | 0.23478400  | -0.53625800 |
| C                                                 | -1.62234700  | -0.59482200 | 0.61097800  |
| C                                                 | -2.80770700  | -1.13730000 | 1.17863000  |
| C                                                 | -4.05780000  | -0.87712300 | 0.64723300  |
| H                                                 | -3.11060800  | 1.15150100  | -1.92849500 |
| H                                                 | -0.89409900  | 0.69239200  | -0.98364900 |
| H                                                 | -2.72258400  | -1.79075200 | 2.04707300  |
| H                                                 | -4.93740800  | -1.33120500 | 1.09504500  |
| N                                                 | -5.44694800  | 0.17991400  | -1.12514200 |
| H                                                 | -5.43752300  | 0.17542700  | -2.13825900 |
| N                                                 | -0.39364600  | -0.84043900 | 1.23205800  |
| H                                                 | -0.44741900  | -1.02865100 | 2.22587200  |
| C                                                 | 0.88508900   | -0.91182400 | 0.69504600  |
| C                                                 | 1.14417000   | -1.08484600 | -0.70008500 |
| C                                                 | 2.00076900   | -0.84122100 | 1.56320000  |
| C                                                 | 2.45298800   | -1.14893400 | -1.16058200 |
| H                                                 | 0.31729600   | -1.17722500 | -1.39430900 |
| C                                                 | 3.30031300   | -0.94765800 | 1.09535100  |
| H                                                 | 1.82377300   | -0.71753600 | 2.63258500  |
| C                                                 | 3.55701000   | -1.08173800 | -0.29725200 |
| H                                                 | 2.63944600   | -1.26965300 | -2.22658900 |
| H                                                 | 4.13335000   | -0.91937900 | 1.79327600  |
| N                                                 | 4.88277000   | -1.21988800 | -0.81637700 |
| C                                                 | 5.93211200   | -0.35928400 | -0.48888200 |
| C                                                 | 5.71133500   | 0.95494500  | -0.02704500 |
| C                                                 | 7.26478300   | -0.77244800 | -0.66229800 |
| C                                                 | 6.78935800   | 1.80303600  | 0.24293400  |
| H                                                 | 4.69458200   | 1.30185900  | 0.11831800  |
| C                                                 | 8.33550700   | 0.08481300  | -0.40457400 |
| H                                                 | 7.46396800   | -1.78402800 | -1.01520900 |
| C                                                 | 8.11271400   | 1.38954200  | 0.06156300  |
| H                                                 | 6.58999500   | 2.81138300  | 0.60503900  |
| H                                                 | 9.35447800   | -0.26056400 | -0.57346800 |
| N                                                 | 9.20596300   | 2.27780400  | 0.28366000  |
| H                                                 | 8.95400500   | 3.01707500  | 0.93369000  |
| C                                                 | -6.68253300  | 0.41592000  | -0.55400200 |
| C                                                 | -6.85008100  | 0.73284700  | 0.82132300  |
| C                                                 | -7.84577900  | 0.35754700  | -1.36127900 |
| C                                                 | -8.12023800  | 0.97007300  | 1.33482000  |
| H                                                 | -5.97692400  | 0.80248600  | 1.46009000  |
| C                                                 | -9.10388100  | 0.60937800  | -0.83197200 |
| H                                                 | -7.73897700  | 0.11367700  | -2.41838400 |
| C                                                 | -9.26596600  | 0.91261500  | 0.53122900  |
| H                                                 | -8.21646700  | 1.21465200  | 2.39200700  |
| H                                                 | -9.97228700  | 0.56526700  | -1.48755500 |
| H                                                 | -10.25246600 | 1.09261000  | 0.94985100  |
| H                                                 | 5.19358300   | -2.17551800 | -0.96832200 |
| H                                                 | 10.01292500  | 1.78872200  | 0.66202300  |

|                                              |          |
|----------------------------------------------|----------|
| Frequency and Energy at B3LYP/6-31G(d)       |          |
| Zero-point correction=<br>(Hartree/Particle) | 0.400637 |
| Thermal correction to Energy=                | 0.425671 |
| Thermal correction to Enthalpy=              | 0.426615 |
| Thermal correction to Gibbs Free Energy=     | 0.341426 |
| Energy at B3LYP/6-311++G(d,p)                |          |
| HF= -1147.103926                             |          |

| Name of compound                                  | PANI-E      |             |             |
|---------------------------------------------------|-------------|-------------|-------------|
| Cartesian Coordinates optimized at B3LYP/6-31G(d) |             |             |             |
| C                                                 | -4.28913700 | 0.35166500  | 0.42104600  |
| C                                                 | -3.06745000 | 0.85662900  | 1.04621100  |
| C                                                 | -1.83309100 | 0.54624400  | 0.58983200  |
| C                                                 | -1.65361300 | -0.30706800 | -0.58394800 |
| C                                                 | -2.87223300 | -0.83694500 | -1.18812600 |
| C                                                 | -4.10850400 | -0.51967900 | -0.74080300 |
| H                                                 | -3.20760500 | 1.46602900  | 1.93426200  |
| H                                                 | -0.95348600 | 0.89066000  | 1.12223000  |
| H                                                 | -2.73068600 | -1.46855400 | -2.06041000 |
| H                                                 | -4.99026200 | -0.88796300 | -1.25343900 |
| N                                                 | -5.41787900 | 0.73322900  | 0.94937700  |
| N                                                 | -0.52654200 | -0.67346400 | -1.13701400 |
| C                                                 | 0.71502100  | -0.13666100 | -0.83257300 |
| C                                                 | 0.97715500  | 1.22336700  | -0.54394400 |
| C                                                 | 1.82925600  | -0.99730800 | -0.93922400 |
| C                                                 | 2.26933100  | 1.67014300  | -0.31805800 |
| H                                                 | 0.16326600  | 1.94115800  | -0.54944300 |
| C                                                 | 3.11984500  | -0.56469300 | -0.68257200 |
| H                                                 | 1.64602400  | -2.03029700 | -1.21959200 |
| C                                                 | 3.36789800  | 0.78557200  | -0.35496100 |
| H                                                 | 2.44360900  | 2.72483000  | -0.11318800 |
| H                                                 | 3.94776900  | -1.25834000 | -0.77400300 |
| N                                                 | 4.63840900  | 1.29045000  | -0.12406000 |
| C                                                 | 5.84587700  | 0.58973800  | 0.08187500  |
| C                                                 | 5.91849100  | -0.57051400 | 0.86764800  |
| C                                                 | 7.03556800  | 1.09734600  | -0.46003600 |
| C                                                 | 7.13472700  | -1.21294300 | 1.07630300  |
| H                                                 | 5.01983200  | -0.96502600 | 1.33039700  |
| C                                                 | 8.25569300  | 0.47138100  | -0.22814900 |
| H                                                 | 7.00174400  | 1.99237000  | -1.07708900 |
| C                                                 | 8.32747300  | -0.70472800 | 0.53584600  |
| H                                                 | 7.16485500  | -2.11043700 | 1.69021600  |
| H                                                 | 9.16415000  | 0.89293900  | -0.65257700 |
| N                                                 | 9.55908200  | -1.31375100 | 0.80793100  |
| H                                                 | 9.50130000  | -2.30183100 | 1.02315600  |
| C                                                 | -6.65874600 | 0.21782400  | 0.56881800  |
| C                                                 | -6.93457200 | -1.16273200 | 0.48739500  |
| C                                                 | -7.71733000 | 1.12693900  | 0.37371600  |
| C                                                 | -8.22145400 | -1.60973000 | 0.19138400  |
| H                                                 | -6.14265100 | -1.87599200 | 0.69626200  |
| C                                                 | -8.99162400 | 0.67226800  | 0.05045100  |
| H                                                 | -7.50895900 | 2.18828000  | 0.46949700  |

|                                          |              |             |             |
|------------------------------------------|--------------|-------------|-------------|
| C                                        | -9.25306800  | -0.69853600 | -0.04170700 |
| H                                        | -8.41788700  | -2.67802600 | 0.14540400  |
| H                                        | -9.79050300  | 1.39041200  | -0.11611900 |
| H                                        | -10.25331700 | -1.05137500 | -0.27685400 |
| H                                        | 4.72000300   | 2.29660300  | -0.16786000 |
| H                                        | 10.27823100  | -1.13616500 | 0.11696500  |
| Frequency and Energy at B3LYP/6-31G(d)   |              |             |             |
| Zero-point correction=                   |              |             | 0.385943    |
| (Hartree/Particle)                       |              |             |             |
| Thermal correction to Energy=            |              |             | 0.409013    |
| Thermal correction to Enthalpy=          |              |             | 0.409957    |
| Thermal correction to Gibbs Free Energy= |              |             | 0.330378    |
| Energy at B3LYP/6-311++G(d,p)            |              |             |             |
| HF= -1145.863814                         |              |             |             |

| Name of compound                                  | PANI-E-N1-H radical |             |             |
|---------------------------------------------------|---------------------|-------------|-------------|
| Cartesian Coordinates optimized at B3LYP/6-31G(d) |                     |             |             |
| C                                                 | -4.16846900         | 0.29514200  | 0.45801900  |
| C                                                 | -2.90822300         | 0.68729400  | 1.08917900  |
| C                                                 | -1.70461800         | 0.43644000  | 0.52847400  |
| C                                                 | -1.60164600         | -0.22708000 | -0.77186100 |
| C                                                 | -2.85959000         | -0.63357300 | -1.39486100 |
| C                                                 | -4.06426800         | -0.37882100 | -0.83795900 |
| H                                                 | -2.99401500         | 1.15712000  | 2.06456300  |
| H                                                 | -0.79188300         | 0.68991100  | 1.05634500  |
| H                                                 | -2.77294600         | -1.11572800 | -2.36415900 |
| H                                                 | -4.97797200         | -0.64597700 | -1.35713600 |
| N                                                 | -5.26025200         | 0.59627600  | 1.10088100  |
| N                                                 | -0.50965200         | -0.51774400 | -1.42517100 |
| C                                                 | 0.75504900          | -0.05742200 | -1.08054000 |
| C                                                 | 1.05014200          | 1.26373000  | -0.67676200 |
| C                                                 | 1.84066000          | -0.93719300 | -1.27469700 |
| C                                                 | 2.35722300          | 1.65599500  | -0.42434700 |
| H                                                 | 0.25054200          | 1.99360700  | -0.60070200 |
| C                                                 | 3.14549100          | -0.55627800 | -1.00228300 |
| H                                                 | 1.62917400          | -1.93492300 | -1.64666900 |
| C                                                 | 3.42502500          | 0.75012700  | -0.55573100 |
| H                                                 | 2.56056500          | 2.67951000  | -0.11619800 |
| H                                                 | 3.95626500          | -1.25320500 | -1.18079000 |
| N                                                 | 4.72393600          | 1.21130100  | -0.31496100 |
| C                                                 | 5.86423900          | 0.51525900  | 0.05868200  |
| C                                                 | 5.82934800          | -0.76257300 | 0.67270400  |
| C                                                 | 7.12224700          | 1.14022900  | -0.13499900 |
| C                                                 | 6.99654000          | -1.38930200 | 1.04390400  |
| H                                                 | 4.87484000          | -1.23299500 | 0.87928000  |
| C                                                 | 8.28987400          | 0.51794100  | 0.23991100  |
| H                                                 | 7.15549700          | 2.12293800  | -0.60211100 |
| C                                                 | 8.28802000          | -0.79000700 | 0.84086500  |
| H                                                 | 6.97526800          | -2.36207600 | 1.52520900  |
| H                                                 | 9.24386400          | 1.01408900  | 0.07503500  |
| N                                                 | 9.36845100          | -1.46675300 | 1.22457200  |
| C                                                 | -6.52920700         | 0.15877800  | 0.71520600  |
| C                                                 | -6.82951100         | -1.18501700 | 0.41104900  |

|                                          |              |             |             |
|------------------------------------------|--------------|-------------|-------------|
| C                                        | -7.58233300  | 1.09400500  | 0.74946100  |
| C                                        | -8.13853700  | -1.56632600 | 0.12089600  |
| H                                        | -6.03887300  | -1.92863000 | 0.44676200  |
| C                                        | -8.87991700  | 0.70999900  | 0.42802900  |
| H                                        | -7.35180400  | 2.12040000  | 1.01814800  |
| C                                        | -9.16685100  | -0.62218800 | 0.11320400  |
| H                                        | -8.35488000  | -2.60896200 | -0.09748000 |
| H                                        | -9.67614100  | 1.44974500  | 0.43876800  |
| H                                        | -10.18459000 | -0.92316000 | -0.11858800 |
| H                                        | 4.85004800   | 2.20827000  | -0.43094600 |
| H                                        | 10.20552900  | -0.90644800 | 1.02017200  |
| Frequency and Energy at B3LYP/6-31G(d)   |              |             |             |
| Zero-point correction=                   |              |             | 0.373263    |
| (Hartree/Particle)                       |              |             |             |
| Thermal correction to Energy=            |              |             | 0.395721    |
| Thermal correction to Enthalpy=          |              |             | 0.396666    |
| Thermal correction to Gibbs Free Energy= |              |             | 0.317776    |
| Energy at B3LYP/6-311++G(d,p)            |              |             |             |
| HF= -1145.217201                         |              |             |             |

| Name of compound                                  |             | PANI-E-N2-H radical |             |
|---------------------------------------------------|-------------|---------------------|-------------|
| Cartesian Coordinates optimized at B3LYP/6-31G(d) |             |                     |             |
| C                                                 | 4.23503500  | 0.37883500          | -0.40923600 |
| C                                                 | 3.01798700  | 0.89246900          | -1.01917000 |
| C                                                 | 1.78026600  | 0.53116600          | -0.59290800 |
| C                                                 | 1.61041600  | -0.38134900         | 0.52352800  |
| C                                                 | 2.82013800  | -0.91349700         | 1.11812400  |
| C                                                 | 4.06002200  | -0.54627800         | 0.70241600  |
| H                                                 | 3.15223800  | 1.55511700          | -1.86894200 |
| H                                                 | 0.90028700  | 0.88763800          | -1.11703300 |
| H                                                 | 2.68471700  | -1.59205200         | 1.95525900  |
| H                                                 | 4.94062400  | -0.91835400         | 1.21409100  |
| N                                                 | 5.36938900  | 0.81385100          | -0.90539000 |
| N                                                 | 0.46537300  | -0.82021900         | 1.02392800  |
| C                                                 | -0.75715400 | -0.26158900         | 0.82254300  |
| C                                                 | -1.02058700 | 1.12993200          | 0.61502000  |
| C                                                 | -1.88653000 | -1.12432200         | 0.96284700  |
| C                                                 | -2.30730000 | 1.59110100          | 0.49276100  |
| H                                                 | -0.19436600 | 1.83312300          | 0.62265500  |
| C                                                 | -3.17020400 | -0.67806800         | 0.77082100  |
| H                                                 | -1.68833500 | -2.16214500         | 1.21376600  |
| C                                                 | -3.43846600 | 0.70775000          | 0.49517500  |
| H                                                 | -2.51313400 | 2.65012700          | 0.37059600  |
| H                                                 | -4.00118500 | -1.36273100         | 0.89962600  |
| N                                                 | -4.64234400 | 1.28135400          | 0.34097300  |
| C                                                 | -5.78614800 | 0.60350200          | 0.01703600  |
| C                                                 | -5.86912900 | -0.59567600         | -0.74395200 |
| C                                                 | -7.01494100 | 1.21352400          | 0.38709900  |
| C                                                 | -7.09137400 | -1.15896700         | -1.06743000 |
| H                                                 | -4.96119500 | -1.04997900         | -1.12577100 |
| C                                                 | -8.23407600 | 0.63414900          | 0.09486600  |
| H                                                 | -6.96410200 | 2.14804500          | 0.93706900  |
| C                                                 | -8.29907100 | -0.57112500         | -0.63721200 |

|                                          |              |             |             |
|------------------------------------------|--------------|-------------|-------------|
| H                                        | -7.12626900  | -2.05936700 | -1.67715900 |
| H                                        | -9.15616200  | 1.11609500  | 0.41230300  |
| N                                        | -9.52103100  | -1.12058900 | -0.99206000 |
| H                                        | -9.52346200  | -2.10306500 | -1.23220300 |
| C                                        | 6.61208100   | 0.28905500  | -0.55984200 |
| C                                        | 6.89393000   | -1.09335000 | -0.50430000 |
| C                                        | 7.67427000   | 1.19788000  | -0.37164500 |
| C                                        | 8.18673200   | -1.54044500 | -0.23844400 |
| H                                        | 6.10274100   | -1.80652700 | -0.71510200 |
| C                                        | 8.95418900   | 0.74228500  | -0.07589400 |
| H                                        | 7.46069200   | 2.25958900  | -0.44907300 |
| C                                        | 9.21971100   | -0.62951600 | -0.00823400 |
| H                                        | 8.38785700   | -2.60853800 | -0.21470200 |
| H                                        | 9.75450800   | 1.45948800  | 0.08723400  |
| H                                        | 10.22466700  | -0.98332000 | 0.20420100  |
| H                                        | -10.31861300 | -0.84870200 | -0.43277200 |
| Frequency and Energy at B3LYP/6-31G(d)   |              |             |             |
| Zero-point correction=                   |              |             | 0.372349    |
| (Hartree/Particle)                       |              |             |             |
| Thermal correction to Energy=            |              |             | 0.394990    |
| Thermal correction to Enthalpy=          |              |             | 0.395934    |
| Thermal correction to Gibbs Free Energy= |              |             | 0.317035    |
| Energy at B3LYP/6-311++G(d,p)            |              |             |             |
| HF= -1145.229488                         |              |             |             |

| Name of compound                                  | PANI-E-cation |             |             |
|---------------------------------------------------|---------------|-------------|-------------|
| Cartesian Coordinates optimized at B3LYP/6-31G(d) |               |             |             |
| C                                                 | -4.27284900   | 0.36910000  | 0.35124300  |
| C                                                 | -3.05896400   | 0.87763800  | 0.97096600  |
| C                                                 | -1.82352700   | 0.49117500  | 0.56445500  |
| C                                                 | -1.66462400   | -0.42023700 | -0.55574200 |
| C                                                 | -2.87240200   | -0.91626100 | -1.19062100 |
| C                                                 | -4.10759500   | -0.53574700 | -0.77912600 |
| H                                                 | -3.19573500   | 1.54858000  | 1.81341600  |
| H                                                 | -0.93972200   | 0.83267300  | 1.09264000  |
| H                                                 | -2.73674200   | -1.57203300 | -2.04488800 |
| H                                                 | -4.98780200   | -0.86595100 | -1.31871000 |
| N                                                 | -5.40048000   | 0.80956700  | 0.85601500  |
| N                                                 | -0.51908900   | -0.87213100 | -1.02435700 |
| C                                                 | 0.71008400    | -0.33416000 | -0.82080100 |
| C                                                 | 0.98666900    | 1.06487100  | -0.75654700 |
| C                                                 | 1.82288000    | -1.22519600 | -0.81503200 |
| C                                                 | 2.27834500    | 1.52230500  | -0.63394400 |
| H                                                 | 0.17112600    | 1.77431900  | -0.84552000 |
| C                                                 | 3.11250200    | -0.77367800 | -0.65775800 |
| H                                                 | 1.62163400    | -2.28329900 | -0.94490800 |
| C                                                 | 3.36852800    | 0.61771800  | -0.54408100 |
| H                                                 | 2.46979300    | 2.59223600  | -0.59162100 |
| H                                                 | 3.93540400    | -1.47732100 | -0.68583600 |
| N                                                 | 4.63271700    | 1.14615400  | -0.41668100 |
| C                                                 | 5.83591300    | 0.55644400  | -0.03876600 |
| C                                                 | 5.91314600    | -0.58470300 | 0.78977000  |
| C                                                 | 7.03703000    | 1.17288100  | -0.45635500 |



|                                          |              |             |             |
|------------------------------------------|--------------|-------------|-------------|
| C                                        | 7.13958100   | -1.10730000 | 1.14818800  |
| H                                        | 5.01047700   | -1.03102300 | 1.18964900  |
| C                                        | 8.26306500   | 0.65333000  | -0.10070600 |
| H                                        | 6.99507800   | 2.05825000  | -1.08601600 |
| C                                        | 8.34612600   | -0.51112600 | 0.70376200  |
| H                                        | 7.18183500   | -1.97476100 | 1.80070900  |
| H                                        | 9.17411700   | 1.13533200  | -0.44328200 |
| N                                        | 9.55105000   | -1.03688300 | 1.04618700  |
| H                                        | 9.61971400   | -1.83601700 | 1.65841200  |
| C                                        | -6.65150600  | 0.29983000  | 0.56748900  |
| C                                        | -6.93481200  | -1.07410500 | 0.36701500  |
| C                                        | -7.72473000  | 1.22192100  | 0.58348400  |
| C                                        | -8.24212700  | -1.49093400 | 0.14559100  |
| H                                        | -6.13849000  | -1.80594600 | 0.45629000  |
| C                                        | -9.01954600  | 0.79896600  | 0.31817300  |
| H                                        | -7.50023700  | 2.26506800  | 0.78085100  |
| C                                        | -9.28428600  | -0.55852200 | 0.09924700  |
| H                                        | -8.45421200  | -2.54856100 | 0.01864700  |
| H                                        | -9.83097700  | 1.52042500  | 0.30329900  |
| H                                        | -10.30214900 | -0.89165700 | -0.08017200 |
| H                                        | 4.70190100   | 2.13317000  | -0.64286200 |
| H                                        | 10.41419600  | -0.58568900 | 0.78233600  |
| Frequency and Energy at B3LYP/6-31G(d)   |              |             |             |
| Zero-point correction=                   |              |             | 0.386525    |
| (Hartree/Particle)                       |              |             |             |
| Thermal correction to Energy=            |              |             | 0.409694    |
| Thermal correction to Enthalpy=          |              |             | 0.410638    |
| Thermal correction to Gibbs Free Energy= |              |             | 0.330591    |
| Energy at B3LYP/6-311++G(d,p)            |              |             |             |
| HF= -1145.641406                         |              |             |             |

| Name of compound                                  |             | PANI-E-anion |             |
|---------------------------------------------------|-------------|--------------|-------------|
| Cartesian Coordinates optimized at B3LYP/6-31G(d) |             |              |             |
| C                                                 | -4.14471000 | -0.36720600  | 0.37317100  |
| C                                                 | -2.86828600 | -0.92020100  | 0.73128900  |
| C                                                 | -1.67431400 | -0.34730600  | 0.36666000  |
| C                                                 | -1.62006100 | 0.87215400   | -0.39582100 |
| C                                                 | -2.89602100 | 1.42309500   | -0.75702000 |
| C                                                 | -4.09011900 | 0.85152000   | -0.39172000 |
| H                                                 | -2.88561300 | -1.84874400  | 1.29789700  |
| H                                                 | -0.74446100 | -0.84348000  | 0.62928400  |
| H                                                 | -2.87829800 | 2.35018500   | -1.32606600 |
| H                                                 | -5.02062900 | 1.34426400   | -0.65813000 |
| N                                                 | -5.24308100 | -0.99355400  | 0.83168100  |
| N                                                 | -0.52124400 | 1.50285800   | -0.85232700 |
| C                                                 | 0.73817100  | 1.29840800   | -0.35604100 |
| C                                                 | 1.07332100  | 1.01296400   | 0.99755200  |
| C                                                 | 1.83885100  | 1.50894900   | -1.23304200 |
| C                                                 | 2.39609500  | 0.90528800   | 1.41454800  |
| H                                                 | 0.27612900  | 0.90104200   | 1.72544400  |
| C                                                 | 3.15627900  | 1.41423500   | -0.81037600 |
| H                                                 | 1.60980100  | 1.76691200   | -2.26358600 |
| C                                                 | 3.46220700  | 1.09105100   | 0.52361300  |

|   |              |             |             |
|---|--------------|-------------|-------------|
| H | 2.61140900   | 0.67683700  | 2.45862500  |
| H | 3.96662100   | 1.60932800  | -1.50889000 |
| N | 4.80535700   | 1.04551400  | 0.98837200  |
| C | 5.81958000   | 0.21487300  | 0.50233900  |
| C | 5.64307800   | -0.67772200 | -0.56963000 |
| C | 7.09634200   | 0.27251500  | 1.09358700  |
| C | 6.70078100   | -1.46039300 | -1.02885500 |
| H | 4.66996600   | -0.76073700 | -1.04048900 |
| C | 8.14385700   | -0.52300500 | 0.64030400  |
| H | 7.26662400   | 0.95880000  | 1.92152900  |
| C | 7.96924400   | -1.40083400 | -0.43849500 |
| H | 6.52901200   | -2.14356000 | -1.85941800 |
| H | 9.11426000   | -0.45987800 | 1.13045100  |
| N | 9.02475100   | -2.24585400 | -0.87099600 |
| H | 8.91951600   | -2.52141200 | -1.84237500 |
| C | -6.50662200  | -0.77178700 | 0.34548300  |
| C | -6.83931700  | -0.52033600 | -1.01533700 |
| C | -7.59854000  | -0.91830600 | 1.24410500  |
| C | -8.16412000  | -0.40530400 | -1.42806900 |
| H | -6.03902800  | -0.45305600 | -1.74600600 |
| C | -8.91611500  | -0.78600700 | 0.82464000  |
| H | -7.36225200  | -1.13418900 | 2.28291400  |
| C | -9.21910000  | -0.52435600 | -0.51782900 |
| H | -8.37670100  | -0.22382600 | -2.48113500 |
| H | -9.72120000  | -0.89361600 | 1.55064900  |
| H | -10.25117500 | -0.42739300 | -0.84684100 |
| H | 4.91638800   | 1.30070100  | 1.96058700  |
| H | 9.93626500   | -1.81466500 | -0.75187900 |

Frequency and Energy at B3LYP/6-31G(d)

|                                          |          |
|------------------------------------------|----------|
| Zero-point correction=                   | 0.382852 |
| (Hartree/Particle)                       |          |
| Thermal correction to Energy=            | 0.406107 |
| Thermal correction to Enthalpy=          | 0.407051 |
| Thermal correction to Gibbs Free Energy= | 0.326233 |

Energy at B3LYP/6-311++G(d,p)

HF= -1145.932413

| Name of compound                                  |             | C60-E1      |            |
|---------------------------------------------------|-------------|-------------|------------|
| Cartesian Coordinates optimized at B3LYP/6-31G(d) |             |             |            |
| C                                                 | -2.55663100 | -0.13909400 | 2.85063700 |
| C                                                 | -3.57596000 | 0.86523400  | 3.09353200 |
| C                                                 | -4.88646700 | 0.47337500  | 3.39473500 |
| C                                                 | -5.22787900 | -0.93940700 | 3.44373800 |
| C                                                 | -4.24843200 | -1.90383000 | 3.21021100 |
| C                                                 | -2.88311100 | -1.49910300 | 2.91662600 |
| C                                                 | -1.66099500 | 0.36297500  | 1.84420800 |
| C                                                 | -1.93412300 | 1.84757600  | 1.58703800 |
| C                                                 | -3.31382200 | 1.99125200  | 2.23859300 |
| C                                                 | -4.36970200 | 2.66126700  | 1.66351000 |
| C                                                 | -5.99150500 | 1.18542500  | 2.80111600 |
| C                                                 | -6.55367300 | -1.09543700 | 2.87079000 |
| C                                                 | -6.84567100 | -2.21034400 | 2.08267300 |
| C                                                 | -5.82413200 | -3.21620900 | 1.83920200 |

|   |             |             |             |
|---|-------------|-------------|-------------|
| C | -4.55155600 | -3.06649500 | 2.39351100  |
| C | -3.37252900 | -3.37498800 | 1.60049900  |
| C | -2.34519800 | -2.40404700 | 1.93044900  |
| C | -1.50721800 | -1.90365800 | 0.92783500  |
| C | -1.16175600 | -0.50029100 | 0.89356300  |
| C | -1.83451700 | 2.32450000  | 0.06299800  |
| C | -1.51875400 | 1.16433700  | -0.91778700 |
| C | -1.09923800 | -0.08779500 | -0.52804600 |
| C | -1.40584300 | -1.25195100 | -1.33023100 |
| C | -1.65783200 | -2.36952300 | -0.43903100 |
| C | -2.63471900 | -3.31318300 | -0.75548500 |
| C | -3.51546000 | -3.82069900 | 0.28471300  |
| C | -4.83723600 | -3.97845800 | -0.28945100 |
| C | -5.97005700 | -3.68178500 | 0.47149900  |
| C | -7.02508000 | 0.22081700  | 2.47142000  |
| C | -7.49647700 | -1.26643900 | -1.87244000 |
| C | -8.01065600 | -0.38870300 | -0.91547400 |
| C | -7.66429300 | 1.01806400  | -0.96173000 |
| C | -6.82144400 | 1.49894500  | -1.96616100 |
| C | -6.28707900 | 0.58623800  | -2.96385400 |
| C | -5.59593700 | -1.77499900 | -3.15957300 |
| C | -5.84513200 | -2.89251000 | -2.26618600 |
| C | -7.02056000 | -2.57947100 | -1.47134000 |
| C | -7.08121400 | -2.96514400 | -0.13119500 |
| C | -7.62155400 | -2.05568900 | 0.86504700  |
| C | -8.07450700 | -0.79138600 | 0.48220000  |
| C | -7.50880900 | 1.48571500  | 0.40694100  |
| C | -6.50557900 | 2.40306300  | 0.71795200  |
| C | -5.62533400 | 2.90116600  | -0.32291500 |
| C | -5.78513300 | 2.46130600  | -1.64099300 |
| C | -4.61795300 | 2.14913700  | -2.42943600 |
| C | -4.92204600 | 0.98985300  | -3.25318900 |
| C | -3.94239600 | 0.02639000  | -3.48481300 |
| C | -4.28488800 | -1.38437900 | -3.44012200 |
| C | -4.77355700 | -3.57554100 | -1.68716200 |
| C | -3.41249500 | -3.16830100 | -1.97564400 |
| C | -3.16965600 | -2.09565000 | -2.83668300 |
| C | -2.14260300 | -1.12319800 | -2.51179800 |
| C | -2.61576000 | 0.18160700  | -2.90719300 |
| C | -2.32295700 | 1.28973000  | -2.10445600 |
| C | -3.34839500 | 2.28914300  | -1.85856300 |
| C | -3.18795200 | 2.78443500  | -0.51902600 |
| C | -4.30221400 | 3.06075300  | 0.23954000  |
| C | -7.76958000 | 0.36703400  | 1.29894400  |
| C | -5.72980000 | 2.25458900  | 1.93687900  |
| C | -6.61752400 | -0.76957900 | -2.91633300 |
| C | 0.48255200  | 3.40835400  | 0.03113200  |
| C | 1.20008600  | 2.35371700  | 0.61752000  |
| C | 2.59163600  | 2.39185500  | 0.70367400  |
| C | 3.32164200  | 3.46702100  | 0.18139700  |
| C | 2.60541800  | 4.52056800  | -0.41032700 |
| C | 1.21981900  | 4.49664500  | -0.47371700 |
| H | 0.68843800  | 1.49433900  | 1.03237300  |
| H | 3.10904800  | 1.57823900  | 1.20046400  |

|   |             |             |             |
|---|-------------|-------------|-------------|
| H | 3.14578400  | 5.36509700  | -0.83177500 |
| H | 0.69377400  | 5.33220500  | -0.93103800 |
| N | -0.91912400 | 3.47454600  | -0.02678000 |
| H | -1.20810600 | 2.47038400  | 2.12462600  |
| H | -1.24609300 | 4.16624700  | -0.68940500 |
| N | 4.72301600  | 3.56265900  | 0.27644600  |
| H | 5.08693700  | 4.49788500  | 0.39368300  |
| C | 5.67604800  | 2.55310400  | 0.24951700  |
| C | 6.97543500  | 2.83625500  | 0.71913300  |
| C | 5.41662300  | 1.25667900  | -0.24242500 |
| C | 7.98176800  | 1.88463600  | 0.66921200  |
| H | 7.18410300  | 3.81573600  | 1.14483000  |
| C | 6.41440700  | 0.29527300  | -0.24443400 |
| H | 4.43333000  | 1.01067300  | -0.62665300 |
| C | 7.73220700  | 0.58432500  | 0.17204700  |
| H | 8.95769600  | 2.12462100  | 1.07902400  |
| H | 6.20485300  | -0.70617900 | -0.60774300 |
| N | 8.64463000  | -0.46026200 | 0.16446900  |
| C | 9.92110200  | -0.32889400 | -0.08414100 |
| C | 10.74794900 | -1.51221700 | 0.13499900  |
| C | 10.60618000 | 0.84527400  | -0.62484900 |
| C | 12.09206700 | -1.50018900 | -0.01164300 |
| H | 10.21946000 | -2.40727200 | 0.45037500  |
| C | 11.94358000 | 0.84291800  | -0.82275000 |
| H | 10.01285500 | 1.70423100  | -0.91804500 |
| C | 12.78922800 | -0.29585600 | -0.46705200 |
| H | 12.67405300 | -2.39697800 | 0.16999500  |
| H | 12.45608000 | 1.69741400  | -1.25506200 |
| N | 14.07102000 | -0.15315200 | -0.65290400 |
| C | 15.01554700 | -1.10146700 | -0.25412100 |
| C | 16.05207700 | -1.41619500 | -1.15495200 |
| C | 15.05217000 | -1.66593400 | 1.03767200  |
| C | 17.05577900 | -2.30992000 | -0.79591200 |
| H | 16.03856200 | -0.95408200 | -2.13742500 |
| C | 16.07816500 | -2.53794900 | 1.39832900  |
| H | 14.29397700 | -1.38432100 | 1.76247800  |
| C | 17.07669000 | -2.87567300 | 0.48290100  |
| H | 17.83582600 | -2.55577000 | -1.51192600 |
| H | 16.09726600 | -2.95341500 | 2.40277000  |
| H | 17.87177700 | -3.55939600 | 0.76685300  |

Frequency and Energy at B3LYP/6-31G(d)

|                                          |                             |
|------------------------------------------|-----------------------------|
| Zero-point correction=                   | 0.763451 (Hartree/Particle) |
| Thermal correction to Energy=            | 0.808344                    |
| Thermal correction to Enthalpy=          | 0.809288                    |
| Thermal correction to Gibbs Free Energy= | 0.686131                    |

Energy at B3LYP/6-311++G(d,p)

HF= -3432.463447

|                                                   |                     |             |             |
|---------------------------------------------------|---------------------|-------------|-------------|
| <b>Name of compound</b>                           | C60-E1-N1-H radical |             |             |
| Cartesian Coordinates optimized at B3LYP/6-31G(d) |                     |             |             |
| C                                                 | 2.32945700          | -0.46692000 | -2.65584800 |
| C                                                 | 3.27050300          | 0.54707500  | -3.09513800 |
| C                                                 | 4.56293400          | 0.17697300  | -3.48894400 |

|   |            |             |             |
|---|------------|-------------|-------------|
| C | 4.96552000 | -1.21948100 | -3.43686200 |
| C | 4.06102100 | -2.19348200 | -3.01600900 |
| C | 2.71323300 | -1.81337200 | -2.62491400 |
| C | 1.50974200 | 0.09820300  | -1.61806800 |
| C | 1.73202400 | 1.61192600  | -1.53662600 |
| C | 3.03603600 | 1.74291100  | -2.33178200 |
| C | 4.11030300 | 2.50258800  | -1.92605000 |
| C | 5.68410200 | 0.98599000  | -3.07946500 |
| C | 6.34667700 | -1.26683900 | -2.98851000 |
| C | 6.76680500 | -2.28601400 | -2.13157100 |
| C | 5.82312200 | -3.30122300 | -1.69183600 |
| C | 4.49719000 | -3.25658800 | -2.12696300 |
| C | 3.41659900 | -3.53016200 | -1.19328000 |
| C | 2.31716400 | -2.63636200 | -1.50829400 |
| C | 1.55657400 | -2.07155800 | -0.47860900 |
| C | 1.14868600 | -0.68596000 | -0.54364000 |
| C | 1.75381700 | 2.23570100  | -0.05370200 |
| C | 1.59782200 | 1.16298100  | 1.05674900  |
| C | 1.20319200 | -0.13734300 | 0.83213700  |
| C | 1.64229900 | -1.20306300 | 1.70588000  |
| C | 1.86086900 | -2.39302100 | 0.90410200  |
| C | 2.90792400 | -3.26259400 | 1.20876700  |
| C | 3.70739800 | -3.83676100 | 0.13799300  |
| C | 5.08447500 | -3.88579500 | 0.58851800  |
| C | 6.12267100 | -3.62237400 | -0.30758900 |
| C | 6.79036400 | 0.09978100  | -2.76576900 |
| C | 7.75126300 | -0.92914900 | 1.63023500  |
| C | 8.12672800 | -0.13132800 | 0.54706800  |
| C | 7.72079000 | 1.25934000  | 0.49389800  |
| C | 6.95499300 | 1.80487900  | 1.52703300  |
| C | 6.56407300 | 0.97500900  | 2.65556700  |
| C | 6.00998400 | -1.37982200 | 3.14442900  |
| C | 6.22508000 | -2.57023400 | 2.34104600  |
| C | 7.30190500 | -2.29259700 | 1.40537500  |
| C | 7.25168500 | -2.80767400 | 0.10892200  |
| C | 7.64849900 | -1.98147900 | -1.01860900 |
| C | 8.07439800 | -0.66862100 | -0.80516400 |
| C | 7.41039200 | 1.58158000  | -0.88972800 |
| C | 6.33738100 | 2.42335600  | -1.18290600 |
| C | 5.53896700 | 2.98959000  | -0.11126500 |
| C | 5.84917600 | 2.69249000  | 1.22017400  |
| C | 4.77857100 | 2.41290800  | 2.14608900  |
| C | 5.21547500 | 1.35299800  | 3.04069400  |
| C | 4.31045600 | 0.38040200  | 3.46194000  |
| C | 4.71486500 | -1.01360000 | 3.51697300  |
| C | 5.13676700 | -3.34872300 | 1.94090900  |
| C | 3.79198600 | -2.96767500 | 2.32529700  |
| C | 3.58222400 | -1.82414400 | 3.09984300  |
| C | 2.48303000 | -0.92894900 | 2.78923500  |
| C | 2.92889900 | 0.42595300  | 3.00841800  |
| C | 2.50852300 | 1.43712200  | 2.13643200  |
| C | 3.45460400 | 2.44667700  | 1.69388500  |
| C | 3.14156600 | 2.79166100  | 0.33686400  |
| C | 4.16154700 | 3.04449600  | -0.54922700 |

|   |              |             |             |
|---|--------------|-------------|-------------|
| C | 7.63628000   | 0.39037100  | -1.69320900 |
| C | 5.45536700   | 2.12403600  | -2.29729600 |
| C | 6.95384500   | -0.36490900 | 2.70483200  |
| C | -0.50130500  | 3.22654800  | -0.02949400 |
| C | -1.27579900  | 2.04506200  | -0.29326500 |
| C | -2.65377000  | 2.07881300  | -0.36198800 |
| C | -3.36475000  | 3.28600200  | -0.16390600 |
| C | -2.62204400  | 4.47249200  | 0.07208900  |
| C | -1.25214000  | 4.44385500  | 0.13364700  |
| H | -0.78133300  | 1.09831700  | -0.46647700 |
| H | -3.19507700  | 1.17140300  | -0.60431600 |
| H | -3.15440100  | 5.41014400  | 0.21944300  |
| H | -0.68189000  | 5.34753100  | 0.32275900  |
| N | 0.82593800   | 3.36249800  | 0.06662300  |
| H | 0.92633000   | 2.14291100  | -2.05958400 |
| N | -4.74288300  | 3.38057500  | -0.23969400 |
| H | -5.09942300  | 4.31667700  | -0.38206600 |
| C | -5.72265800  | 2.38009200  | -0.17010100 |
| C | -6.94451700  | 2.59248300  | -0.83236100 |
| C | -5.55377800  | 1.19301400  | 0.56708400  |
| C | -7.97261400  | 1.66405400  | -0.74928600 |
| H | -7.07704700  | 3.48958600  | -1.43304200 |
| C | -6.56551400  | 0.24525800  | 0.60710400  |
| H | -4.63630100  | 1.02216600  | 1.11869000  |
| C | -7.81009100  | 0.46607800  | -0.01886800 |
| H | -8.89212700  | 1.83506500  | -1.30010200 |
| H | -6.42678500  | -0.67818600 | 1.16043100  |
| N | -8.74892100  | -0.55742500 | 0.03134900  |
| C | -10.03045700 | -0.36832800 | 0.18363900  |
| C | -10.88377800 | -1.54736500 | 0.04536500  |
| C | -10.70220100 | 0.88075500  | 0.54790000  |
| C | -12.23132600 | -1.48086500 | 0.11625500  |
| H | -10.36926200 | -2.48628600 | -0.13678300 |
| C | -12.04666900 | 0.93747900  | 0.66811500  |
| H | -10.09488400 | 1.75221500  | 0.76631600  |
| C | -12.90935000 | -0.21245600 | 0.39574800  |
| H | -12.83360000 | -2.37573600 | 0.00580800  |
| H | -12.55393700 | 1.85059400  | 0.96543700  |
| N | -14.19223600 | -0.01215500 | 0.48997800  |
| C | -15.15016500 | -0.96772200 | 0.14383200  |
| C | -16.25447200 | -1.12704200 | 1.00396000  |
| C | -15.12810400 | -1.68806200 | -1.06825900 |
| C | -17.26981900 | -2.02481400 | 0.69166400  |
| H | -16.28338100 | -0.54404600 | 1.91939700  |
| C | -16.16624500 | -2.56168900 | -1.38726600 |
| H | -14.31642500 | -1.52414300 | -1.77087500 |
| C | -17.23318800 | -2.74630000 | -0.50593600 |
| H | -18.10354500 | -2.15122000 | 1.37729300  |
| H | -16.14132000 | -3.09841300 | -2.33213600 |
| H | -18.03743300 | -3.43216300 | -0.75660600 |

Frequency and Energy at B3LYP/6-31G(d)

|                                 |                             |
|---------------------------------|-----------------------------|
| Zero-point correction=          | 0.750461 (Hartree/Particle) |
| Thermal correction to Energy=   | 0.795032                    |
| Thermal correction to Enthalpy= | 0.795976                    |

|                                          |          |
|------------------------------------------|----------|
| Thermal correction to Gibbs Free Energy= | 0.673119 |
| Energy at B3LYP/6-311++G(d,p)            |          |
| HF= -3431.821546                         |          |

| Name of compound                                  | C60-E1-N2-H radical |             |             |
|---------------------------------------------------|---------------------|-------------|-------------|
| Cartesian Coordinates optimized at B3LYP/6-31G(d) |                     |             |             |
| C                                                 | 2.45546200          | -0.37127400 | -2.78663800 |
| C                                                 | 3.43373500          | 0.64239200  | -3.13580500 |
| C                                                 | 4.74340400          | 0.26768500  | -3.46111200 |
| C                                                 | 5.12563500          | -1.13508200 | -3.42996900 |
| C                                                 | 4.18547000          | -2.10842900 | -3.09438400 |
| C                                                 | 2.82059900          | -1.72288500 | -2.77454200 |
| C                                                 | 1.58358700          | 0.17204900  | -1.78091400 |
| C                                                 | 1.82027600          | 1.67765600  | -1.63453300 |
| C                                                 | 3.16970700          | 1.81602800  | -2.34801600 |
| C                                                 | 4.22577800          | 2.55189400  | -1.86014800 |
| C                                                 | 5.84783400          | 1.04866400  | -2.96031100 |
| C                                                 | 6.47619600          | -1.21513900 | -2.90093100 |
| C                                                 | 6.83119600          | -2.26570900 | -2.05263200 |
| C                                                 | 5.85059600          | -3.28088300 | -1.70276800 |
| C                                                 | 4.55417800          | -3.20466100 | -2.21516800 |
| C                                                 | 3.41568600          | -3.49158500 | -1.35740200 |
| C                                                 | 2.34767100          | -2.57395000 | -1.71011000 |
| C                                                 | 1.53304300          | -2.03062000 | -0.71062100 |
| C                                                 | 1.14670900          | -0.63818600 | -0.75616600 |
| C                                                 | 1.76574600          | 2.25300200  | -0.14099700 |
| C                                                 | 1.52006900          | 1.15455000  | 0.92730500  |
| C                                                 | 1.12678100          | -0.13228400 | 0.63627000  |
| C                                                 | 1.49778000          | -1.23072700 | 1.50134400  |
| C                                                 | 1.74935200          | -2.39850300 | 0.67709700  |
| C                                                 | 2.76562100          | -3.29108100 | 1.01657600  |
| C                                                 | 3.62157900          | -3.84307900 | -0.02158100 |
| C                                                 | 4.96816100          | -3.92484900 | 0.50909900  |
| C                                                 | 6.06197800          | -3.64888300 | -0.31404100 |
| C                                                 | 6.92199100          | 0.13760800  | -2.60854000 |
| C                                                 | 7.60120600          | -1.03956500 | 1.80231000  |
| C                                                 | 8.05236800          | -0.21441000 | 0.76977400  |
| C                                                 | 7.66527300          | 1.18208200  | 0.73627000  |
| C                                                 | 6.84675800          | 1.70598100  | 1.73928900  |
| C                                                 | 6.37821600          | 0.84810300  | 2.81559000  |
| C                                                 | 5.76697100          | -1.51279800 | 3.19466200  |
| C                                                 | 6.01615900          | -2.68062900 | 2.36808800  |
| C                                                 | 7.15072800          | -2.38932000 | 1.50831600  |
| C                                                 | 7.17278400          | -2.86273000 | 0.19536800  |
| C                                                 | 7.64735700          | -2.00785100 | -0.87961800 |
| C                                                 | 8.07569400          | -0.70852700 | -0.59954000 |
| C                                                 | 7.44421100          | 1.55170100  | -0.65323100 |
| C                                                 | 6.40274100          | 2.41777200  | -0.98452600 |
| C                                                 | 5.54775400          | 2.96019600  | 0.05507700  |
| C                                                 | 5.76999800          | 2.61476100  | 1.39204500  |
| C                                                 | 4.64347800          | 2.32441800  | 2.24550700  |
| C                                                 | 5.01349700          | 1.23219700  | 3.13147200  |
| C                                                 | 4.07295900          | 0.25980300  | 3.46507900  |

|   |              |             |             |
|---|--------------|-------------|-------------|
| C | 4.45618700   | -1.14074700 | 3.50032500  |
| C | 4.94483100   | -3.43069400 | 1.87845400  |
| C | 3.58387600   | -3.04283900 | 2.19287200  |
| C | 3.34128900   | -1.92178700 | 2.98994600  |
| C | 2.27400400   | -1.00213500 | 2.64169400  |
| C | 2.72151300   | 0.33892700  | 2.93125900  |
| C | 2.36492600   | 1.38225900  | 2.06971300  |
| C | 3.34965100   | 2.39043800  | 1.71788700  |
| C | 3.12462500   | 2.78996700  | 0.35596400  |
| C | 4.20011300   | 3.04355300  | -0.46395100 |
| C | 7.70513700   | 0.38312500  | -1.47859500 |
| C | 5.58656900   | 2.16606400  | -2.15938900 |
| C | 6.74765600   | -0.49806200 | 2.84505100  |
| C | -0.56676200  | 3.31792400  | -0.12971600 |
| C | -1.29250800  | 2.19111800  | -0.56664300 |
| C | -2.67963300  | 2.21438800  | -0.61430200 |
| C | -3.42111200  | 3.36713600  | -0.24708000 |
| C | -2.67012400  | 4.51288600  | 0.13179300  |
| C | -1.29466100  | 4.48269600  | 0.21487100  |
| H | -0.77941800  | 1.29075100  | -0.88108800 |
| H | -3.20163800  | 1.34402300  | -0.99719400 |
| H | -3.21960600  | 5.41500600  | 0.38195600  |
| H | -0.75286300  | 5.37155200  | 0.53218200  |
| N | 0.81893600   | 3.37568500  | -0.07719100 |
| H | 1.05321100   | 2.23872600  | -2.18314200 |
| H | 1.18478300   | 4.18780100  | 0.40040100  |
| N | -4.78004700  | 3.51856600  | -0.32282400 |
| C | -5.66327100  | 2.51819300  | -0.18650100 |
| C | -6.99825100  | 2.78002100  | -0.64548000 |
| C | -5.43020100  | 1.23425200  | 0.41930400  |
| C | -8.00097000  | 1.84948300  | -0.54477200 |
| H | -7.17339600  | 3.74199400  | -1.11761200 |
| C | -6.43435000  | 0.30392500  | 0.51363500  |
| H | -4.45701400  | 1.01831500  | 0.84603600  |
| C | -7.76209000  | 0.57481800  | 0.06163700  |
| H | -8.97732100  | 2.06096600  | -0.96816500 |
| H | -6.25804300  | -0.66027700 | 0.98127700  |
| N | -8.66552000  | -0.43293900 | 0.17871400  |
| C | -9.97746800  | -0.29017100 | 0.29343700  |
| C | -10.77525100 | -1.48310700 | 0.09341100  |
| C | -10.69029500 | 0.90886400  | 0.69582700  |
| C | -12.13277500 | -1.46730300 | 0.14044600  |
| H | -10.22856200 | -2.39707700 | -0.11939100 |
| C | -12.04461000 | 0.91422900  | 0.80013400  |
| H | -10.12058200 | 1.78960300  | 0.97114700  |
| C | -12.85653200 | -0.24571500 | 0.46647200  |
| H | -12.69635100 | -2.37980300 | -0.01892400 |
| H | -12.58343200 | 1.79687000  | 1.13150500  |
| N | -14.15726800 | -0.09904000 | 0.56366000  |
| C | -15.07279800 | -1.05809400 | 0.13901400  |
| C | -16.20715700 | -1.27855900 | 0.94795700  |
| C | -14.99113100 | -1.72991200 | -1.10035600 |
| C | -17.18905900 | -2.18404000 | 0.56177400  |
| H | -16.28286200 | -0.73407500 | 1.88422400  |



|                                          |              |             |                             |
|------------------------------------------|--------------|-------------|-----------------------------|
| C                                        | -15.99602300 | -2.61159000 | -1.49301100                 |
| H                                        | -14.15932600 | -1.51970300 | -1.76590600                 |
| C                                        | -17.09102300 | -2.85577700 | -0.66133600                 |
| H                                        | -18.04488700 | -2.35614000 | 1.20935900                  |
| H                                        | -15.92405600 | -3.10797100 | -2.45747600                 |
| H                                        | -17.86911600 | -3.54828200 | -0.96993100                 |
| Frequency and Energy at B3LYP/6-31G(d)   |              |             |                             |
| Zero-point correction=                   |              |             | 0.749598 (Hartree/Particle) |
| Thermal correction to Energy=            |              |             | 0.794208                    |
| Thermal correction to Enthalpy=          |              |             | 0.795152                    |
| Thermal correction to Gibbs Free Energy= |              |             | 0.672231                    |
| Energy at B3LYP/6-311++G(d,p)            |              |             |                             |
| HF= -3431.828572                         |              |             |                             |

| Name of compound                                  | C60-E1 cation |             |             |
|---------------------------------------------------|---------------|-------------|-------------|
| Cartesian Coordinates optimized at B3LYP/6-31G(d) |               |             |             |
| C                                                 | 2.49829200    | -0.32753500 | -2.77740600 |
| C                                                 | 3.45226400    | 0.71697600  | -3.10202300 |
| C                                                 | 4.76872500    | 0.38065700  | -3.43935800 |
| C                                                 | 5.18238000    | -1.01320800 | -3.44866100 |
| C                                                 | 4.26582800    | -2.01651600 | -3.13723700 |
| C                                                 | 2.89479100    | -1.66977600 | -2.80064600 |
| C                                                 | 1.61833800    | 0.16614800  | -1.75355200 |
| C                                                 | 1.82479500    | 1.67298500  | -1.56718700 |
| C                                                 | 3.16799000    | 1.86239300  | -2.28156200 |
| C                                                 | 4.20849400    | 2.60724200  | -1.77526100 |
| C                                                 | 5.85790700    | 1.17241100  | -2.92157500 |
| C                                                 | 6.53704600    | -1.07729600 | -2.92835300 |
| C                                                 | 6.91825700    | -2.14206100 | -2.11025200 |
| C                                                 | 5.96203400    | -3.18814700 | -1.78470300 |
| C                                                 | 4.66246100    | -3.12816300 | -2.29040700 |
| C                                                 | 3.53511200    | -3.46386300 | -1.43600200 |
| C                                                 | 2.44541000    | -2.56061300 | -1.75818400 |
| C                                                 | 1.62138400    | -2.06565900 | -0.74196400 |
| C                                                 | 1.20416600    | -0.68074200 | -0.74898100 |
| C                                                 | 1.77246200    | 2.19551100  | -0.05465400 |
| C                                                 | 1.54592900    | 1.07321600  | 0.98824000  |
| C                                                 | 1.18476200    | -0.21372800 | 0.65747600  |
| C                                                 | 1.58047400    | -1.32726600 | 1.49159700  |
| C                                                 | 1.85239500    | -2.46618400 | 0.63436700  |
| C                                                 | 2.89152800    | -3.34226600 | 0.94468800  |
| C                                                 | 3.75480400    | -3.84677000 | -0.11127700 |
| C                                                 | 5.10503200    | -3.91303900 | 0.41195800  |
| C                                                 | 6.18796700    | -3.58924100 | -0.40751500 |
| C                                                 | 6.95397000    | 0.27628200  | -2.60038800 |
| C                                                 | 7.67846900    | -1.00572900 | 1.77358200  |
| C                                                 | 8.10641300    | -0.14292700 | 0.76257700  |
| C                                                 | 7.68741800    | 1.24452400  | 0.76915400  |
| C                                                 | 6.86347400    | 1.72254900  | 1.78993900  |
| C                                                 | 6.41942500    | 0.82559300  | 2.84424300  |
| C                                                 | 5.86176200    | -1.55790400 | 3.15957700  |
| C                                                 | 6.13300600    | -2.69644900 | 2.29981400  |
| C                                                 | 7.25700900    | -2.35649100 | 1.44431400  |

|   |              |             |             |
|---|--------------|-------------|-------------|
| C | 7.28323600   | -2.79272700 | 0.11892000  |
| C | 7.73381200   | -1.89846100 | -0.93388300 |
| C | 8.13439400   | -0.59846500 | -0.61979300 |
| C | 7.45209200   | 1.64742200  | -0.60885200 |
| C | 6.39227700   | 2.50037400  | -0.91254900 |
| C | 5.53006000   | 2.99386500  | 0.14538100  |
| C | 5.76452100   | 2.61488800  | 1.47092100  |
| C | 4.64898200   | 2.27669400  | 2.32159200  |
| C | 5.04788900   | 1.16935600  | 3.17590200  |
| C | 4.13127200   | 0.16751700  | 3.48707200  |
| C | 4.54498800   | -1.22462600 | 3.48240200  |
| C | 5.07710800   | -3.45728600 | 1.79430600  |
| C | 3.70978600   | -3.10779900 | 2.12428100  |
| C | 3.44613600   | -2.01614300 | 2.95422500  |
| C | 2.35829500   | -1.11077300 | 2.63301500  |
| C | 2.77683800   | 0.23142200  | 2.95913300  |
| C | 2.39208700   | 1.29174700  | 2.13188400  |
| C | 3.35121800   | 2.33150600  | 1.80446600  |
| C | 3.11250800   | 2.76514800  | 0.45468800  |
| C | 4.17835700   | 3.05788900  | -0.36584200 |
| C | 7.73567600   | 0.50822500  | -1.46701900 |
| C | 5.57661500   | 2.26180600  | -2.09042400 |
| C | 6.81790100   | -0.51224300 | 2.83416100  |
| C | -0.57599200  | 3.24117000  | -0.04311900 |
| C | -1.29370900  | 2.07563400  | -0.41886900 |
| C | -2.67217100  | 2.09010300  | -0.50756900 |
| C | -3.40625300  | 3.26248900  | -0.22167800 |
| C | -2.69229700  | 4.43907400  | 0.11239600  |
| C | -1.32103700  | 4.42910600  | 0.20375700  |
| H | -0.76786300  | 1.16247800  | -0.66411000 |
| H | -3.18443800  | 1.19823600  | -0.84804300 |
| H | -3.23648700  | 5.35620100  | 0.32416100  |
| H | -0.79470200  | 5.33963900  | 0.47723300  |
| N | 0.78013600   | 3.28995600  | 0.06578900  |
| H | 1.04323400   | 2.23085700  | -2.09959200 |
| H | 1.17347300   | 4.17786800  | 0.35025700  |
| N | -4.78768500  | 3.33930100  | -0.30669900 |
| H | -5.14973900  | 4.27693800  | -0.44688900 |
| C | -5.75661100  | 2.35636300  | -0.22920300 |
| C | -7.04361300  | 2.65453800  | -0.74016500 |
| C | -5.53272500  | 1.08925000  | 0.36360400  |
| C | -8.06243200  | 1.72921000  | -0.67492200 |
| H | -7.21887900  | 3.61708000  | -1.21538300 |
| C | -6.54609400  | 0.15700800  | 0.40289000  |
| H | -4.57672800  | 0.86244400  | 0.81986200  |
| C | -7.84785800  | 0.44715100  | -0.09213000 |
| H | -9.02834000  | 1.96096200  | -1.11091900 |
| H | -6.38105300  | -0.81541500 | 0.85471300  |
| N | -8.77297600  | -0.55324300 | -0.06795000 |
| C | -10.06155500 | -0.41603600 | 0.14507000  |
| C | -10.90267200 | -1.56513500 | -0.15323100 |
| C | -10.70670100 | 0.74100100  | 0.74892900  |
| C | -12.24813700 | -1.52886100 | 0.00124300  |
| H | -10.39593000 | -2.45557500 | -0.51146800 |

|                                          |              |             |                             |
|------------------------------------------|--------------|-------------|-----------------------------|
| C                                        | -12.04594100 | 0.75524200  | 0.95487200                  |
| H                                        | -10.09003300 | 1.57055300  | 1.07812200                  |
| C                                        | -12.90880500 | -0.33969100 | 0.53011600                  |
| H                                        | -12.84659000 | -2.40709500 | -0.21229100                 |
| H                                        | -12.54059700 | 1.59953700  | 1.42493100                  |
| N                                        | -14.19036700 | -0.16980800 | 0.73235300                  |
| C                                        | -15.18503400 | -1.00093300 | 0.24535600                  |
| C                                        | -16.33075700 | -1.15677200 | 1.05848600                  |
| C                                        | -15.17027000 | -1.60335200 | -1.03555200                 |
| C                                        | -17.38527200 | -1.95815500 | 0.64209900                  |
| H                                        | -16.34827500 | -0.65584600 | 2.02098400                  |
| C                                        | -16.25107900 | -2.36917200 | -1.45890300                 |
| H                                        | -14.34198900 | -1.41146800 | -1.71021200                 |
| C                                        | -17.35113200 | -2.56660300 | -0.61816500                 |
| H                                        | -18.24747400 | -2.09389800 | 1.28827200                  |
| H                                        | -16.24166600 | -2.80745700 | -2.45274000                 |
| H                                        | -18.18893800 | -3.17075300 | -0.95339000                 |
| Frequency and Energy at B3LYP/6-31G(d)   |              |             |                             |
| Zero-point correction=                   |              |             | 0.764436 (Hartree/Particle) |
| Thermal correction to Energy=            |              |             | 0.809138                    |
| Thermal correction to Enthalpy=          |              |             | 0.810082                    |
| Thermal correction to Gibbs Free Energy= |              |             | 0.687245                    |
| Energy at B3LYP/6-311++G(d,p)            |              |             |                             |
| HF= -3432.241443                         |              |             |                             |

| Name of compound                                  | C60-E1 anion |             |             |
|---------------------------------------------------|--------------|-------------|-------------|
| Cartesian Coordinates optimized at B3LYP/6-31G(d) |              |             |             |
| C                                                 | 2.58171000   | 0.12356000  | 2.84486300  |
| C                                                 | 3.57003300   | -0.90773300 | 3.07449900  |
| C                                                 | 4.89760000   | -0.55550700 | 3.38644200  |
| C                                                 | 5.27549400   | 0.84896400  | 3.44647300  |
| C                                                 | 4.32261300   | 1.84295200  | 3.22511600  |
| C                                                 | 2.94279400   | 1.48066100  | 2.93111200  |
| C                                                 | 1.67866300   | -0.33437100 | 1.82578900  |
| C                                                 | 1.91411900   | -1.82111100 | 1.54391900  |
| C                                                 | 3.28704100   | -2.01014500 | 2.19952000  |
| C                                                 | 4.32621000   | -2.70011300 | 1.61307400  |
| C                                                 | 5.98051900   | -1.27923800 | 2.77825900  |
| C                                                 | 6.61094000   | 0.98291400  | 2.88863700  |
| C                                                 | 6.93744800   | 2.11203400  | 2.12154000  |
| C                                                 | 5.94801900   | 3.14416000  | 1.89207800  |
| C                                                 | 4.66013700   | 3.01525600  | 2.43687200  |
| C                                                 | 3.49728600   | 3.35960300  | 1.64352600  |
| C                                                 | 2.43957900   | 2.40857700  | 1.95547000  |
| C                                                 | 1.58919000   | 1.95244100  | 0.93761900  |
| C                                                 | 1.20404900   | 0.55483700  | 0.88478400  |
| C                                                 | 1.81085400   | -2.26606500 | 0.01239800  |
| C                                                 | 1.52509600   | -1.08870700 | -0.95308000 |
| C                                                 | 1.13811000   | 0.16785600  | -0.53956700 |
| C                                                 | 1.48148700   | 1.34197400  | -1.31973900 |
| C                                                 | 1.74775800   | 2.43852000  | -0.41487700 |
| C                                                 | 2.76082400   | 3.36932100  | -0.71618800 |
| C                                                 | 3.65127900   | 3.82470500  | 0.33260900  |

|   |             |             |             |
|---|-------------|-------------|-------------|
| C | 4.98475100  | 3.96157900  | -0.23123600 |
| C | 6.10657600  | 3.62544700  | 0.53228800  |
| C | 7.04380500  | -0.33391900 | 2.46680100  |
| C | 7.57653900  | 1.20910300  | -1.84843300 |
| C | 8.06379800  | 0.30441600  | -0.90166100 |
| C | 7.67974600  | -1.09657500 | -0.96621800 |
| C | 6.82461200  | -1.53374400 | -1.98604700 |
| C | 6.32342400  | -0.59752300 | -2.97041400 |
| C | 5.70146800  | 1.78733900  | -3.13668600 |
| C | 5.97082500  | 2.88158200  | -2.22166400 |
| C | 7.13556900  | 2.52834500  | -1.42669600 |
| C | 7.20145200  | 2.89126300  | -0.08028200 |
| C | 7.71252100  | 1.95215500  | 0.90435400  |
| C | 8.13303000  | 0.68247000  | 0.49968900  |
| C | 7.51679300  | -1.58397700 | 0.38761100  |
| C | 6.47898600  | -2.48912900 | 0.68402700  |
| C | 5.58831000  | -2.93461900 | -0.36514700 |
| C | 5.75798200  | -2.47537600 | -1.67802200 |
| C | 4.60694800  | -2.13124800 | -2.46939800 |
| C | 4.94611300  | -0.95906400 | -3.26257700 |
| C | 3.99318200  | 0.03392300  | -3.48257500 |
| C | 4.37173600  | 1.43474000  | -3.42369600 |
| C | 4.91586600  | 3.58333400  | -1.63181200 |
| C | 3.53993800  | 3.21532100  | -1.92697900 |
| C | 3.27871700  | 2.15909000  | -2.80874200 |
| C | 2.22217100  | 1.20590900  | -2.50111900 |
| C | 2.65457800  | -0.10018300 | -2.92156400 |
| C | 2.32950000  | -1.22041800 | -2.13763300 |
| C | 3.32385400  | -2.24778300 | -1.90527800 |
| C | 3.15021800  | -2.75744000 | -0.57508000 |
| C | 4.25375100  | -3.07336200 | 0.18819800  |
| C | 7.79179500  | -0.48698500 | 1.29354100  |
| C | 5.70115100  | -2.33110000 | 1.89347500  |
| C | 6.69038600  | 0.75640000  | -2.90658000 |
| C | -0.52752700 | -3.32202400 | -0.00968700 |
| C | -1.22957100 | -2.24875300 | 0.56924700  |
| C | -2.61749100 | -2.28364400 | 0.69546200  |
| C | -3.36451700 | -3.36903600 | 0.21995700  |
| C | -2.66850000 | -4.43637500 | -0.36961300 |
| C | -1.28536000 | -4.41901900 | -0.47092500 |
| H | -0.70209800 | -1.37934200 | 0.94116800  |
| H | -3.12041800 | -1.45630300 | 1.18542200  |
| H | -3.22399300 | -5.28798500 | -0.75713900 |
| H | -0.77281600 | -5.26600400 | -0.92287900 |
| N | 0.86171100  | -3.39431000 | -0.10122300 |
| H | 1.16896500  | -2.43365800 | 2.06774900  |
| H | 1.18151200  | -4.09180500 | -0.76047700 |
| N | -4.76552100 | -3.46393400 | 0.36497700  |
| H | -5.11913600 | -4.39277800 | 0.54636200  |
| C | -5.72865200 | -2.47088400 | 0.28646000  |
| C | -7.02982700 | -2.75062800 | 0.75812200  |
| C | -5.48405300 | -1.18950800 | -0.25360000 |
| C | -8.04950000 | -1.81858100 | 0.66083200  |
| H | -7.22696900 | -3.71462100 | 1.22424500  |

|   |              |             |             |
|---|--------------|-------------|-------------|
| C | -6.49724800  | -0.24700200 | -0.30646200 |
| H | -4.49915700  | -0.94327300 | -0.63377000 |
| C | -7.81965100  | -0.53317000 | 0.10906400  |
| H | -9.02358100  | -2.05714700 | 1.07552300  |
| H | -6.29916900  | 0.74152300  | -0.70983900 |
| N | -8.73939400  | 0.49446600  | 0.04087600  |
| C | -10.03247400 | 0.33329500  | -0.15119800 |
| C | -10.86346900 | 1.51291900  | 0.02061900  |
| C | -10.72467900 | -0.87034700 | -0.59133300 |
| C | -12.21664200 | 1.48229400  | -0.08724100 |
| H | -10.33867900 | 2.43154100  | 0.26844100  |
| C | -12.07289900 | -0.89077800 | -0.74932000 |
| H | -10.13705400 | -1.74432300 | -0.85040600 |
| C | -12.91745200 | 0.25608000  | -0.44854300 |
| H | -12.79669200 | 2.38732700  | 0.05852700  |
| H | -12.58519700 | -1.77794100 | -1.11133600 |
| N | -14.21179600 | 0.09879600  | -0.60231200 |
| C | -15.14866500 | 1.05406800  | -0.22297400 |
| C | -16.23066900 | 1.30381800  | -1.09444800 |
| C | -15.14998600 | 1.70020400  | 1.03370600  |
| C | -17.23932900 | 2.19602200  | -0.74627600 |
| H | -16.24637300 | 0.78639100  | -2.04927900 |
| C | -16.17689100 | 2.57488100  | 1.38380300  |
| H | -14.35564000 | 1.48095900  | 1.74113000  |
| C | -17.22180200 | 2.83938000  | 0.49563800  |
| H | -18.05263400 | 2.38356500  | -1.44374900 |
| H | -16.16047700 | 3.05175800  | 2.36134700  |
| H | -18.01792600 | 3.52580500  | 0.77147700  |

Frequency and Energy at B3LYP/6-31G(d)

|                                          |                             |
|------------------------------------------|-----------------------------|
| Zero-point correction=                   | 0.759222 (Hartree/Particle) |
| Thermal correction to Energy=            | 0.804524                    |
| Thermal correction to Enthalpy=          | 0.805468                    |
| Thermal correction to Gibbs Free Energy= | 0.681066                    |

Energy at B3LYP/6-311++G(d,p)

HF= -3432.564332

| Name of compound                                  | C60-L1     |             |             |
|---------------------------------------------------|------------|-------------|-------------|
| Cartesian Coordinates optimized at B3LYP/6-31G(d) |            |             |             |
| C                                                 | 2.17359000 | -0.86001600 | -2.51988300 |
| C                                                 | 3.15596700 | -0.01740900 | -3.17691500 |
| C                                                 | 4.40288300 | -0.54565200 | -3.53471200 |
| C                                                 | 4.71787200 | -1.93222900 | -3.22884300 |
| C                                                 | 3.77352600 | -2.74102600 | -2.59786700 |
| C                                                 | 2.47142800 | -2.20001400 | -2.24378900 |
| C                                                 | 1.44340300 | -0.05192100 | -1.58204700 |
| C                                                 | 1.76618500 | 1.42897300  | -1.79664400 |
| C                                                 | 3.03505300 | 1.31429500  | -2.64772800 |
| C                                                 | 4.17199900 | 2.06105300  | -2.43725100 |
| C                                                 | 5.59134800 | 0.24454700  | -3.32637000 |
| C                                                 | 6.11230700 | -1.99193300 | -2.82565300 |
| C                                                 | 6.50579000 | -2.85748600 | -1.80303200 |
| C                                                 | 5.52069200 | -3.70127400 | -1.14560000 |
| C                                                 | 4.18159100 | -3.64561800 | -1.53687900 |

|   |             |             |             |
|---|-------------|-------------|-------------|
| C | 3.12954500  | -3.65957800 | -0.53273100 |
| C | 2.07574100  | -2.76578300 | -0.97739600 |
| C | 1.40140800  | -1.96313900 | -0.05049400 |
| C | 1.08063100  | -0.58958400 | -0.36640600 |
| C | 1.89689000  | 2.31685400  | -0.47172900 |
| C | 1.71942600  | 1.49161800  | 0.83132400  |
| C | 1.23265100  | 0.20452300  | 0.87507700  |
| C | 1.64248100  | -0.70503100 | 1.92266100  |
| C | 1.74737200  | -2.03796600 | 1.35768700  |
| C | 2.75011000  | -2.90616900 | 1.78880700  |
| C | 3.46113000  | -3.72832100 | 0.82234500  |
| C | 4.85159900  | -3.78803800 | 1.22746800  |
| C | 5.86203000  | -3.77407900 | 0.26385300  |
| C | 6.65195100  | -0.64296300 | -2.88428800 |
| C | 7.74535100  | -0.88616700 | 1.59345900  |
| C | 8.12175400  | -0.33717200 | 0.36551600  |
| C | 7.80115900  | 1.04304200  | 0.05983800  |
| C | 7.12172900  | 1.82770600  | 0.99440900  |
| C | 6.73112800  | 1.25725800  | 2.27337700  |
| C | 6.05139800  | -0.91689500 | 3.22325800  |
| C | 6.15339600  | -2.25032100 | 2.65706500  |
| C | 7.20120700  | -2.23216100 | 1.65029500  |
| C | 7.05781800  | -2.97721100 | 0.47873500  |
| C | 7.45477000  | -2.41049100 | -0.79891900 |
| C | 7.97372200  | -1.11529900 | -0.85627000 |
| C | 7.44985500  | 1.11934600  | -1.34974800 |
| C | 6.42112900  | 1.96485000  | -1.76440300 |
| C | 5.71036700  | 2.77827100  | -0.79499100 |
| C | 6.05941800  | 2.71499100  | 0.55804700  |
| C | 5.01828200  | 2.69549100  | 1.55686700  |
| C | 5.42850300  | 1.79599700  | 2.62343800  |
| C | 4.48379100  | 0.98775400  | 3.25260400  |
| C | 4.80076600  | -0.39567900 | 3.56195000  |
| C | 5.00015900  | -3.00973800 | 2.44891100  |
| C | 3.70150600  | -2.46837600 | 2.79773100  |
| C | 3.60060300  | -1.18730600 | 3.34573000  |
| C | 2.54710700  | -0.29120500 | 2.90546200  |
| C | 3.08779800  | 1.04548000  | 2.84550000  |
| C | 2.69134900  | 1.90004500  | 1.81042700  |
| C | 3.67953600  | 2.73726500  | 1.15192800  |
| C | 3.32715600  | 2.84814400  | -0.23702900 |
| C | 4.32024500  | 2.84400700  | -1.18948200 |
| C | 7.56339200  | -0.21525200 | -1.91650300 |
| C | 5.47192100  | 1.52396800  | -2.77137000 |
| C | 7.03643300  | -0.07360300 | 2.56585400  |
| C | -0.38649200 | 3.46574800  | -0.45385300 |
| C | -1.17758800 | 2.31735500  | -0.59987800 |
| C | -2.56905800 | 2.38360200  | -0.51643800 |
| C | -3.22557100 | 3.59387000  | -0.25932900 |
| C | -2.43204900 | 4.74503200  | -0.10764600 |
| C | -1.04993900 | 4.68366500  | -0.21441200 |
| H | -0.72824500 | 1.35166400  | -0.79359700 |
| H | -3.14596300 | 1.47723600  | -0.66431000 |
| H | -2.91013100 | 5.69911800  | 0.10291700  |

|   |              |             |             |
|---|--------------|-------------|-------------|
| H | -0.46768200  | 5.59634000  | -0.10254400 |
| N | 1.01664400   | 3.48946900  | -0.59162800 |
| H | 0.97439300   | 1.91352200  | -2.38158500 |
| H | 1.42743500   | 4.31042100  | -0.16443000 |
| N | -4.62272900  | 3.71456700  | -0.17434000 |
| H | -5.00148000  | 4.58299800  | -0.52470700 |
| C | -5.56053900  | 2.69078900  | 0.02647700  |
| C | -6.81404300  | 2.75859800  | -0.60132300 |
| C | -5.32056700  | 1.61169300  | 0.89453100  |
| C | -7.79366000  | 1.79444200  | -0.38004400 |
| H | -7.01968000  | 3.57262600  | -1.29356300 |
| C | -6.29758600  | 0.64849400  | 1.11574700  |
| H | -4.37462400  | 1.54351200  | 1.42134300  |
| C | -7.55298400  | 0.71576700  | 0.48694300  |
| H | -8.73521200  | 1.86192400  | -0.91379000 |
| H | -6.09250400  | -0.16663400 | 1.80677000  |
| N | -8.47636900  | -0.31496300 | 0.70629600  |
| H | -8.07866200  | -1.19261200 | 1.00841800  |
| C | -9.87417100  | -0.28331600 | 0.64663700  |
| C | -10.57292800 | -1.49508800 | 0.50409400  |
| C | -10.62893000 | 0.89505300  | 0.77485800  |
| C | -11.96217800 | -1.53750200 | 0.49316000  |
| H | -10.01326500 | -2.42417700 | 0.41671600  |
| C | -12.01847700 | 0.85566800  | 0.71698600  |
| H | -10.12950900 | 1.84506800  | 0.92834600  |
| C | -12.71546000 | -0.35464800 | 0.57637500  |
| H | -12.46533900 | -2.49588600 | 0.42625300  |
| H | -12.57844600 | 1.78506700  | 0.79710100  |
| N | -14.12003800 | -0.34066800 | 0.59181100  |
| H | -14.53989000 | 0.41076500  | 1.12009200  |
| C | -15.01954000 | -1.21890600 | -0.01338800 |
| C | -16.34849000 | -1.24557500 | 0.45186700  |
| C | -14.67164700 | -2.04817700 | -1.09561900 |
| C | -17.29413700 | -2.07531400 | -0.14228500 |
| H | -16.63035500 | -0.61137900 | 1.29025500  |
| C | -15.62602400 | -2.88491800 | -1.67198900 |
| H | -13.66513500 | -2.01842800 | -1.49746900 |
| C | -16.94113000 | -2.91048300 | -1.20506900 |
| H | -18.31319500 | -2.07443500 | 0.23639800  |
| H | -15.33455800 | -3.51565800 | -2.50830400 |
| H | -17.67745400 | -3.56522500 | -1.66162100 |

Frequency and Energy at B3LYP/6-31G(d)

|                                          |                             |
|------------------------------------------|-----------------------------|
| Zero-point correction=                   | 0.786904 (Hartree/Particle) |
| Thermal correction to Energy=            | 0.832982                    |
| Thermal correction to Enthalpy=          | 0.833926                    |
| Thermal correction to Gibbs Free Energy= | 0.707521                    |

Energy at B3LYP/6-311++G(d,p)

HF= -3433.712117

|                                                   |                     |             |             |
|---------------------------------------------------|---------------------|-------------|-------------|
| <b>Name of compound</b>                           | C60-L1-N1-H radical |             |             |
| Cartesian Coordinates optimized at B3LYP/6-31G(d) |                     |             |             |
| C                                                 | 2.11431500          | -0.97298300 | -2.43864900 |
| C                                                 | 3.05793500          | -0.12867900 | -3.14833300 |

|   |            |             |             |
|---|------------|-------------|-------------|
| C | 4.30523100 | -0.64134700 | -3.52833500 |
| C | 4.65943500 | -2.01119000 | -3.19211100 |
| C | 3.75201100 | -2.82231100 | -2.51196800 |
| C | 2.44970100 | -2.29822000 | -2.13405600 |
| C | 1.39105700 | -0.15370900 | -1.50418000 |
| C | 1.67234100 | 1.32773100  | -1.77367400 |
| C | 2.92051000 | 1.21552700  | -2.65606300 |
| C | 4.04803600 | 1.98906400  | -2.49339700 |
| C | 5.48119300 | 0.17928800  | -3.37676900 |
| C | 6.06618500 | -2.03007800 | -2.82927200 |
| C | 6.50819900 | -2.85756200 | -1.79494500 |
| C | 5.56151900 | -3.70289800 | -1.08522000 |
| C | 4.21064500 | -3.68666300 | -1.43809800 |
| C | 3.18888300 | -3.69432700 | -0.40316300 |
| C | 2.10340900 | -2.83598400 | -0.84111800 |
| C | 1.43792200 | -2.02179700 | 0.08219800  |
| C | 1.07740400 | -0.66479500 | -0.26314700 |
| C | 1.81996300 | 2.26037500  | -0.47035500 |
| C | 1.70528900 | 1.46379000  | 0.85689700  |
| C | 1.24904100 | 0.16762800  | 0.95115100  |
| C | 1.70890500 | -0.70247200 | 2.01092200  |
| C | 1.82704100 | -2.04852000 | 1.48076600  |
| C | 2.86050300 | -2.88292900 | 1.90660600  |
| C | 3.56107300 | -3.71724100 | 0.94298700  |
| C | 4.96381000 | -3.73600600 | 1.30840300  |
| C | 5.94514700 | -3.72772100 | 0.31511100  |
| C | 6.57404000 | -0.67221600 | -2.94214000 |
| C | 7.80278900 | -0.76319200 | 1.50627500  |
| C | 8.13076500 | -0.24147400 | 0.25285800  |
| C | 7.77281600 | 1.12298400  | -0.08235700 |
| C | 7.10147300 | 1.91932300  | 0.84876900  |
| C | 6.76084400 | 1.37696900  | 2.15453200  |
| C | 6.15733400 | -0.78288800 | 3.18547700  |
| C | 6.27207300 | -2.12937200 | 2.65412700  |
| C | 7.28995200 | -2.11819300 | 1.61678300  |
| C | 7.12936700 | -2.90027700 | 0.47178700  |
| C | 7.47581800 | -2.36174500 | -0.83239900 |
| C | 7.96363500 | -1.05769000 | -0.94136000 |
| C | 7.37738800 | 1.15047500  | -1.48145000 |
| C | 6.31753000 | 1.96130500  | -1.88823000 |
| C | 5.61775900 | 2.78826100  | -0.92232300 |
| C | 6.00993200 | 2.77375100  | 0.42061900  |
| C | 4.99740200 | 2.75787400  | 1.44856700  |
| C | 5.45725400 | 1.89784600  | 2.52713900  |
| C | 4.54937000 | 1.08829000  | 3.20750000  |
| C | 4.90576700 | -0.27861300 | 3.54599900  |
| C | 5.13056400 | -2.91946600 | 2.50235600  |
| C | 3.83106900 | -2.39587500 | 2.87394000  |
| C | 3.71765000 | -1.10182300 | 3.38807000  |
| C | 2.63243400 | -0.24111500 | 2.95432500  |
| C | 3.14182500 | 1.10429400  | 2.84005400  |
| C | 2.69839400 | 1.92031400  | 1.79237400  |
| C | 3.64689100 | 2.75970600  | 1.08127000  |
| C | 3.25189800 | 2.81483800  | -0.29691100 |



|   |              |             |             |
|---|--------------|-------------|-------------|
| C | 4.21571900   | 2.81620200  | -1.27695400 |
| C | 7.50314700   | -0.19734100 | -2.01376800 |
| C | 5.34887600   | 1.47042000  | -2.85249600 |
| C | 7.10399200   | 0.06194400  | 2.47548300  |
| C | -0.38681100  | 3.34717600  | -0.51858300 |
| C | -1.21864300  | 2.17871800  | -0.42568900 |
| C | -2.59460300  | 2.26551600  | -0.38366500 |
| C | -3.25033400  | 3.51961300  | -0.42900000 |
| C | -2.45254500  | 4.68798000  | -0.55563700 |
| C | -1.08435100  | 4.60421800  | -0.60047500 |
| H | -0.77048700  | 1.19427700  | -0.40437200 |
| H | -3.18513500  | 1.35679200  | -0.34073100 |
| H | -2.94080300  | 5.65967100  | -0.60144900 |
| H | -0.47269400  | 5.49669800  | -0.68562700 |
| N | 0.94764500   | 3.43264300  | -0.55675000 |
| H | 0.85040800   | 1.77200400  | -2.34957100 |
| N | -4.62262000  | 3.65188100  | -0.39656600 |
| H | -4.97993700  | 4.55776800  | -0.66966500 |
| C | -5.59310100  | 2.70901000  | 0.00765200  |
| C | -6.83351900  | 2.67790800  | -0.64412100 |
| C | -5.38647300  | 1.83452600  | 1.08612200  |
| C | -7.84058700  | 1.80673600  | -0.24274200 |
| H | -7.00594800  | 3.33353900  | -1.49449900 |
| C | -6.38629100  | 0.95766500  | 1.48434400  |
| H | -4.45030400  | 1.86267300  | 1.63365100  |
| C | -7.63516200  | 0.92366900  | 0.83357700  |
| H | -8.77607600  | 1.78671600  | -0.78949400 |
| H | -6.20999400  | 0.30055400  | 2.33304400  |
| N | -8.58800700  | 0.00356700  | 1.26296600  |
| H | -8.22713700  | -0.77590100 | 1.79453400  |
| C | -9.96504000  | -0.04448600 | 0.98322500  |
| C | -10.60339400 | -1.29209700 | 0.90735800  |
| C | -10.75498700 | 1.10818600  | 0.84365000  |
| C | -11.97457300 | -1.39534900 | 0.69932100  |
| H | -10.01548600 | -2.19943600 | 1.02806600  |
| C | -12.11781100 | 1.00511600  | 0.58843300  |
| H | -10.30417600 | 2.08975800  | 0.94355700  |
| C | -12.75785500 | -0.24385200 | 0.51051000  |
| H | -12.43966700 | -2.37456300 | 0.69073200  |
| H | -12.70468800 | 1.91230700  | 0.46183700  |
| N | -14.14346000 | -0.28256700 | 0.31172900  |
| H | -14.64716400 | 0.53558900  | 0.62344300  |
| C | -14.93657400 | -1.30240500 | -0.22321000 |
| C | -16.30777800 | -1.32043500 | 0.09269400  |
| C | -14.43585800 | -2.27924400 | -1.10228700 |
| C | -17.14930200 | -2.28699100 | -0.44970000 |
| H | -16.70634100 | -0.57140400 | 0.77409000  |
| C | -15.28680500 | -3.25157700 | -1.62580200 |
| H | -13.39184100 | -2.26067700 | -1.39427400 |
| C | -16.64549200 | -3.26788900 | -1.30707000 |
| H | -18.20495000 | -2.27763900 | -0.19075200 |
| H | -14.87914500 | -3.99658500 | -2.30450300 |
| H | -17.30082400 | -4.02799700 | -1.72175200 |

Frequency and Energy at B3LYP/6-31G(d)

|                                          |                             |
|------------------------------------------|-----------------------------|
| Zero-point correction=                   | 0.774128 (Hartree/Particle) |
| Thermal correction to Energy=            | 0.819763                    |
| Thermal correction to Enthalpy=          | 0.820707                    |
| Thermal correction to Gibbs Free Energy= | 0.695452                    |
| Energy at B3LYP/6-311++G(d,p)            |                             |
| HF= -3433.073514                         |                             |

| Name of compound                                  | C60-L1-N2-H radical |             |             |
|---------------------------------------------------|---------------------|-------------|-------------|
| Cartesian Coordinates optimized at B3LYP/6-31G(d) |                     |             |             |
| C                                                 | -2.21008000         | -0.87698300 | 2.54481400  |
| C                                                 | -3.17632100         | -0.00255500 | 3.18401500  |
| C                                                 | -4.43946600         | -0.49470400 | 3.53612200  |
| C                                                 | -4.78714200         | -1.87590500 | 3.24197000  |
| C                                                 | -3.85840900         | -2.71525400 | 2.62813600  |
| C                                                 | -2.53964700         | -2.21194600 | 2.28017400  |
| C                                                 | -1.45157500         | -0.09808800 | 1.60473000  |
| C                                                 | -1.73840200         | 1.39275600  | 1.80095600  |
| C                                                 | -3.01716900         | 1.31975300  | 2.64157300  |
| C                                                 | -4.13268400         | 2.09295600  | 2.41293000  |
| C                                                 | -5.60540200         | 0.32327800  | 3.30868800  |
| C                                                 | -6.17917500         | -1.90448900 | 2.82734800  |
| C                                                 | -6.58593100         | -2.77084400 | 1.81062500  |
| C                                                 | -5.61714100         | -3.64637600 | 1.17089700  |
| C                                                 | -4.28044600         | -3.62057300 | 1.57329500  |
| C                                                 | -3.22066500         | -3.67223300 | 0.57872700  |
| C                                                 | -2.14768300         | -2.80136000 | 1.02324100  |
| C                                                 | -1.44549900         | -2.02598700 | 0.09378800  |
| C                                                 | -1.09243500         | -0.65768500 | 0.39816100  |
| C                                                 | -1.83659100         | 2.26830900  | 0.46403600  |
| C                                                 | -1.66811400         | 1.42578800  | -0.82847500 |
| C                                                 | -1.21439100         | 0.12646600  | -0.85289400 |
| C                                                 | -1.63775000         | -0.78361200 | -1.89467600 |
| C                                                 | -1.78126500         | -2.10730300 | -1.31652600 |
| C                                                 | -2.80217700         | -2.95424300 | -1.74729600 |
| C                                                 | -3.54233200         | -3.74729600 | -0.77835700 |
| C                                                 | -4.93033400         | -3.77616800 | -1.19514900 |
| C                                                 | -5.94834300         | -3.72589300 | -0.24061700 |
| C                                                 | -6.68446200         | -0.54166900 | 2.86674000  |
| C                                                 | -7.74556700         | -0.80545200 | -1.61740600 |
| C                                                 | -8.11828300         | -0.23380800 | -0.39877300 |
| C                                                 | -7.76509400         | 1.14100300  | -0.10499500 |
| C                                                 | -7.05855100         | 1.89827600  | -1.04205300 |
| C                                                 | -6.67177000         | 1.30417000  | -2.31153600 |
| C                                                 | -6.03933100         | -0.89703100 | -3.23195600 |
| C                                                 | -6.17996300         | -2.22112100 | -2.65218800 |
| C                                                 | -7.23543500         | -2.16530700 | -1.65500600 |
| C                                                 | -7.12154000         | -2.90128800 | -0.47450600 |
| C                                                 | -7.51460400         | -2.31070400 | 0.79355200  |
| C                                                 | -8.00049200         | -1.00216300 | 0.83246700  |
| C                                                 | -7.42415700         | 1.22376000  | 1.30678700  |
| C                                                 | -6.37787700         | 2.04724300  | 1.72158700  |
| C                                                 | -5.63831500         | 2.83145200  | 0.74961600  |
| C                                                 | -5.97703100         | 2.76211600  | -0.60568500 |

|   |             |             |             |
|---|-------------|-------------|-------------|
| C | -4.92854500 | 2.70550500  | -1.59531600 |
| C | -5.35264700 | 1.80526300  | -2.65573100 |
| C | -4.42356400 | 0.96644000  | -3.26769700 |
| C | -4.77296200 | -0.41168800 | -3.56530900 |
| C | -5.04846600 | -3.00751300 | -2.42589100 |
| C | -3.73344900 | -2.50340000 | -2.76918600 |
| C | -3.59545100 | -1.23124200 | -3.32971600 |
| C | -2.52346000 | -0.35751000 | -2.88938500 |
| C | -3.03014200 | 0.99307100  | -2.84892200 |
| C | -2.62080800 | 1.84887800  | -1.82006200 |
| C | -3.59268900 | 2.71796500  | -1.17955000 |
| C | -3.24969600 | 2.83563800  | 0.21119700  |
| C | -4.25031900 | 2.86538000  | 1.15541300  |
| C | -7.57655600 | -0.10138300 | 1.88664800  |
| C | -5.44884500 | 1.59329600  | 2.74151700  |
| C | -7.00818700 | -0.02178400 | -2.59229500 |
| C | 0.46877000  | 3.38179700  | 0.47783200  |
| C | 1.24022600  | 2.21514600  | 0.63708100  |
| C | 2.62717000  | 2.26343100  | 0.57655800  |
| C | 3.32827100  | 3.48101100  | 0.36895600  |
| C | 2.53167600  | 4.65508700  | 0.25883300  |
| C | 1.15352800  | 4.60541500  | 0.28913400  |
| H | 0.76650500  | 1.25822900  | 0.81775200  |
| H | 3.18667900  | 1.34968000  | 0.74589200  |
| H | 3.04778300  | 5.60135300  | 0.12864100  |
| H | 0.57842200  | 5.52376900  | 0.18478700  |
| N | -0.92431900 | 3.41624900  | 0.56457700  |
| H | -0.93860500 | 1.86189300  | 2.38750700  |
| H | -1.33031200 | 4.27584000  | 0.21950100  |
| N | 4.68460200  | 3.64791500  | 0.36727300  |
| C | 5.55659800  | 2.65764200  | 0.03513000  |
| C | 6.89509800  | 2.79108600  | 0.50230300  |
| C | 5.29040600  | 1.53655700  | -0.80645000 |
| C | 7.87663400  | 1.86125400  | 0.21703500  |
| H | 7.11650500  | 3.64423400  | 1.13629400  |
| C | 6.28096800  | 0.62772800  | -1.12590800 |
| H | 4.30846300  | 1.42707700  | -1.25398000 |
| C | 7.59129400  | 0.75332500  | -0.61234500 |
| H | 8.86499500  | 1.97397700  | 0.64782600  |
| H | 6.05697700  | -0.19540400 | -1.80233800 |
| N | 8.52148700  | -0.22821500 | -0.92891700 |
| H | 8.13072800  | -1.09524400 | -1.27116200 |
| C | 9.92041300  | -0.21346400 | -0.80115400 |
| C | 10.59344500 | -1.42282300 | -0.56492700 |
| C | 10.69188400 | 0.94863900  | -0.96621800 |
| C | 11.98032300 | -1.47940700 | -0.48859000 |
| H | 10.01794800 | -2.33889200 | -0.45032800 |
| C | 12.07591400 | 0.89989300  | -0.84619000 |
| H | 10.20941700 | 1.89129500  | -1.19951900 |
| C | 12.75058200 | -0.30927300 | -0.60426700 |
| H | 12.46763700 | -2.43733100 | -0.34671500 |
| H | 12.65073000 | 1.81679400  | -0.95708100 |
| N | 14.14977400 | -0.30475300 | -0.55335900 |
| H | 14.59755500 | 0.44591500  | -1.05958900 |

|                                          |             |             |                             |
|------------------------------------------|-------------|-------------|-----------------------------|
| C                                        | 15.01921000 | -1.20329300 | 0.07262700                  |
| C                                        | 16.34800300 | -1.27903300 | -0.38449100                 |
| C                                        | 14.63903400 | -1.99657800 | 1.16994500                  |
| C                                        | 17.26493000 | -2.12398000 | 0.23346400                  |
| H                                        | 16.65308000 | -0.67230800 | -1.23477000                 |
| C                                        | 15.56339700 | -2.85068100 | 1.76954300                  |
| H                                        | 13.63286300 | -1.92399000 | 1.56733000                  |
| C                                        | 16.87943800 | -2.92525500 | 1.31072500                  |
| H                                        | 18.28576700 | -2.16233400 | -0.13800900                 |
| H                                        | 15.24881200 | -3.45364100 | 2.61769600                  |
| H                                        | 17.59294800 | -3.59184500 | 1.78591600                  |
| Frequency and Energy at B3LYP/6-31G(d)   |             |             |                             |
| Zero-point correction=                   |             |             | 0.774411 (Hartree/Particle) |
| Thermal correction to Energy=            |             |             | 0.819869                    |
| Thermal correction to Enthalpy=          |             |             | 0.820813                    |
| Thermal correction to Gibbs Free Energy= |             |             | 0.695645                    |
| Energy at B3LYP/6-311++G(d,p)            |             |             |                             |
| HF= -3433.079528                         |             |             |                             |

| Name of compound                                  |            | C60-L1-N3-H radical |             |
|---------------------------------------------------|------------|---------------------|-------------|
| Cartesian Coordinates optimized at B3LYP/6-31G(d) |            |                     |             |
| C                                                 | 2.54552900 | -0.44425300         | -2.82711400 |
| C                                                 | 3.55224100 | 0.53351500          | -3.19875400 |
| C                                                 | 4.85977600 | 0.11834400          | -3.48230800 |
| C                                                 | 5.21067300 | -1.28926900         | -3.38450000 |
| C                                                 | 4.24357600 | -2.22777000         | -3.02766000 |
| C                                                 | 2.88135300 | -1.80143400         | -2.75183000 |
| C                                                 | 1.66633500 | 0.15939400          | -1.86280300 |
| C                                                 | 1.93371400 | 1.66430000          | -1.77326100 |
| C                                                 | 3.29896800 | 1.74379300          | -2.46499900 |
| C                                                 | 4.36107700 | 2.47797500          | -1.98787900 |
| C                                                 | 5.97113500 | 0.89646600          | -2.99254200 |
| C                                                 | 6.54875400 | -1.37528900         | -2.82569000 |
| C                                                 | 6.86501200 | -2.39690700         | -1.92816400 |
| C                                                 | 5.85633500 | -3.37604200         | -1.55618900 |
| C                                                 | 4.57173300 | -3.29390000         | -2.09669700 |
| C                                                 | 3.41115900 | -3.52122000         | -1.25083300 |
| C                                                 | 2.37014200 | -2.59724000         | -1.66272400 |
| C                                                 | 1.54835200 | -1.99567000         | -0.70315400 |
| C                                                 | 1.19337700 | -0.59842300         | -0.81380200 |
| C                                                 | 1.86163900 | 2.30262800          | -0.30771900 |
| C                                                 | 1.57452400 | 1.25442800          | 0.79884500  |
| C                                                 | 1.15651100 | -0.03462500         | 0.55574100  |
| C                                                 | 1.48735400 | -1.10353200         | 1.47260500  |
| C                                                 | 1.73023300 | -2.30972100         | 0.70265500  |
| C                                                 | 2.71996700 | -3.20846400         | 1.09962700  |
| C                                                 | 3.58348700 | -3.82134900         | 0.10235800  |
| C                                                 | 4.91784300 | -3.90837800         | 0.66247800  |
| C                                                 | 6.03284100 | -3.68930700         | -0.14935600 |
| C                                                 | 7.01829300 | -0.02112100         | -2.58124900 |
| C                                                 | 7.58763300 | -1.02639400         | 1.88699500  |
| C                                                 | 8.07605400 | -0.25457000         | 0.83024700  |
| C                                                 | 7.72038400 | 1.14739600          | 0.73110600  |

|   |             |             |             |
|---|-------------|-------------|-------------|
| C | 6.89382600  | 1.72966700  | 1.69469400  |
| C | 6.38629300  | 0.92718900  | 2.79587500  |
| C | 5.71744800  | -1.40272600 | 3.26136000  |
| C | 5.95684700  | -2.60876900 | 2.48872800  |
| C | 7.11380500  | -2.37754400 | 1.64047300  |
| C | 7.15029300  | -2.90553700 | 0.34895700  |
| C | 7.66366900  | -2.10655400 | -0.75080200 |
| C | 8.11472600  | -0.80585200 | -0.51660600 |
| C | 7.53374900  | 1.46311000  | -0.67659900 |
| C | 6.51758300  | 2.33573700  | -1.06469600 |
| C | 5.65485100  | 2.93960400  | -0.06582000 |
| C | 5.84397800  | 2.64552200  | 1.28865900  |
| C | 4.69520800  | 2.41402100  | 2.13016900  |
| C | 5.02440800  | 1.35203600  | 3.06777000  |
| C | 4.05705300  | 0.41426200  | 3.42264900  |
| C | 4.40902800  | -0.99093300 | 3.52442200  |
| C | 4.87915000  | -3.35641200 | 2.00942500  |
| C | 3.52096800  | -2.92792000 | 2.28060900  |
| C | 3.28719900  | -1.76935600 | 3.02512700  |
| C | 2.24675600  | -0.84324800 | 2.61760500  |
| C | 2.71796300  | 0.49905200  | 2.85948900  |
| C | 2.40079500  | 1.51236100  | 1.94817900  |
| C | 3.41346300  | 2.48451800  | 1.57423300  |
| C | 3.22292000  | 2.82968600  | 0.19227000  |
| C | 4.31933600  | 3.02966100  | -0.61452600 |
| C | 7.78533900  | 0.25570900  | -1.44742100 |
| C | 5.71865000  | 2.05190200  | -2.24418000 |
| C | 6.72620600  | -0.42384700 | 2.88897000  |
| C | -0.46444800 | 3.36379800  | -0.29178600 |
| C | -1.19495300 | 2.25494900  | -0.74723400 |
| C | -2.58940900 | 2.26436000  | -0.74994000 |
| C | -3.30803500 | 3.36907100  | -0.27363300 |
| C | -2.57787500 | 4.47978700  | 0.18165200  |
| C | -1.19086200 | 4.48011800  | 0.16418100  |
| H | -0.69139000 | 1.37324900  | -1.12395700 |
| H | -3.11971800 | 1.40567700  | -1.14678100 |
| H | -3.10811000 | 5.34912900  | 0.56384100  |
| H | -0.65488700 | 5.35764400  | 0.52035900  |
| N | 0.93804300  | 3.45132300  | -0.32224900 |
| H | 1.19283200  | 2.22296900  | -2.35893500 |
| H | 1.28519300  | 4.21679900  | 0.24195600  |
| N | -4.71232700 | 3.43620600  | -0.28487800 |
| H | -5.09926100 | 4.35921900  | -0.42451700 |
| C | -5.64654200 | 2.41930200  | -0.13437100 |
| C | -6.97937100 | 2.66313700  | -0.53383700 |
| C | -5.34023000 | 1.15726400  | 0.42245200  |
| C | -7.96898000 | 1.71298700  | -0.36501500 |
| H | -7.22309200 | 3.61449100  | -1.00385900 |
| C | -6.32289400 | 0.19506500  | 0.55466400  |
| H | -4.33238600 | 0.94669700  | 0.76211900  |
| C | -7.68057000 | 0.43412100  | 0.19763600  |
| H | -8.96973100 | 1.92371900  | -0.72632100 |
| H | -6.08470300 | -0.77690500 | 0.97576000  |
| N | -8.54810700 | -0.60370700 | 0.34603800  |

|                                          |              |             |                             |
|------------------------------------------|--------------|-------------|-----------------------------|
| C                                        | -9.90112000  | -0.44847000 | 0.43597800                  |
| C                                        | -10.69954000 | -1.58109300 | 0.11703900                  |
| C                                        | -10.59426300 | 0.69743000  | 0.92101300                  |
| C                                        | -12.07983200 | -1.55986900 | 0.19480200                  |
| H                                        | -10.18165600 | -2.48141000 | -0.19946400                 |
| C                                        | -11.97495700 | 0.71365000  | 1.01757300                  |
| H                                        | -10.03021200 | 1.55806600  | 1.26411500                  |
| C                                        | -12.75221500 | -0.39844800 | 0.63317400                  |
| H                                        | -12.64578600 | -2.45323400 | -0.04396700                 |
| H                                        | -12.47577300 | 1.60184300  | 1.39946000                  |
| N                                        | -14.13701300 | -0.32450500 | 0.77647000                  |
| H                                        | -14.46458300 | 0.38061100  | 1.42217300                  |
| C                                        | -15.14447600 | -1.07061800 | 0.15348000                  |
| C                                        | -16.39773400 | -1.15990000 | 0.78653300                  |
| C                                        | -14.97550200 | -1.68552100 | -1.09971200                 |
| C                                        | -17.44772000 | -1.84896800 | 0.18703400                  |
| H                                        | -16.53764100 | -0.68990700 | 1.75784800                  |
| C                                        | -16.03058700 | -2.38638500 | -1.68152500                 |
| H                                        | -14.03252300 | -1.59147200 | -1.62608100                 |
| C                                        | -17.27130100 | -2.47666100 | -1.04833400                 |
| H                                        | -18.40693800 | -1.90306800 | 0.69535800                  |
| H                                        | -15.88023200 | -2.85358300 | -2.65145400                 |
| H                                        | -18.08816000 | -3.02261600 | -1.51089900                 |
| Frequency and Energy at B3LYP/6-31G(d)   |              |             |                             |
| Zero-point correction=                   |              |             | 0.774657 (Hartree/Particle) |
| Thermal correction to Energy=            |              |             | 0.819982                    |
| Thermal correction to Enthalpy=          |              |             | 0.820927                    |
| Thermal correction to Gibbs Free Energy= |              |             | 0.696781                    |
| Energy at B3LYP/6-311++G(d,p)            |              |             |                             |
| HF= -3433.079373                         |              |             |                             |

| Name of compound                                  | C60-L1-N4-H radical |             |            |
|---------------------------------------------------|---------------------|-------------|------------|
| Cartesian Coordinates optimized at B3LYP/6-31G(d) |                     |             |            |
| C                                                 | -2.51499900         | -0.34826000 | 2.81664900 |
| C                                                 | -3.53622400         | 0.62345400  | 3.16346800 |
| C                                                 | -4.83603100         | 0.19560800  | 3.46272800 |
| C                                                 | -5.16464400         | -1.21963900 | 3.40644500 |
| C                                                 | -4.18356400         | -2.15248900 | 3.07364300 |
| C                                                 | -2.82917200         | -1.71226700 | 2.78124100 |
| C                                                 | -1.64804800         | 0.24185100  | 1.83310500 |
| C                                                 | -1.94002400         | 1.73923700  | 1.70162500 |
| C                                                 | -3.30441300         | 1.81629900  | 2.39496000 |
| C                                                 | -4.37946200         | 2.51946100  | 1.90063900 |
| C                                                 | -5.96095200         | 0.94175800  | 2.95486800 |
| C                                                 | -6.50274900         | -1.34270200 | 2.85466500 |
| C                                                 | -6.80543400         | -2.39441600 | 1.98773900 |
| C                                                 | -5.78187700         | -3.36715700 | 1.64030900 |
| C                                                 | -4.49727800         | -3.24973100 | 2.17445000 |
| C                                                 | -3.33546700         | -3.48271600 | 1.33155200 |
| C                                                 | -2.30845300         | -2.53047700 | 1.71346200 |
| C                                                 | -1.49892800         | -1.94330500 | 0.73465300 |
| C                                                 | -1.16578500         | -0.53802100 | 0.80450200 |
| C                                                 | -1.88148400         | 2.33667800  | 0.21857000 |

|   |             |             |             |
|---|-------------|-------------|-------------|
| C | -1.58149700 | 1.26163500  | -0.85842800 |
| C | -1.14131100 | -0.01299600 | -0.58066600 |
| C | -1.45801400 | -1.11258900 | -1.46583500 |
| C | -1.67936100 | -2.30018600 | -0.66116700 |
| C | -2.65581200 | -3.22554900 | -1.02919100 |
| C | -3.50686500 | -3.82352000 | -0.01220700 |
| C | -4.84119000 | -3.94708700 | -0.56533700 |
| C | -5.95724400 | -3.72288700 | 0.24353300  |
| C | -6.99442400 | -0.00363200 | 2.57333600  |
| C | -7.56021800 | -1.14418600 | -1.86269000 |
| C | -8.05783400 | -0.35055000 | -0.82656600 |
| C | -7.72422200 | 1.05908800  | -0.76830900 |
| C | -6.90975200 | 1.62694700  | -1.75055600 |
| C | -6.39261200 | 0.80167900  | -2.83018700 |
| C | -5.68788100 | -1.52950300 | -3.23141800 |
| C | -5.90592900 | -2.71691000 | -2.42434300 |
| C | -7.06414600 | -2.48004300 | -1.57933700 |
| C | -7.08867200 | -2.97178900 | -0.27326500 |
| C | -7.61172900 | -2.15018800 | 0.80501400  |
| C | -8.08405700 | -0.86394200 | 0.53548900  |
| C | -7.53904500 | 1.41771000  | 0.62925900  |
| C | -6.53596500 | 2.31726700  | 0.98904000  |
| C | -5.68552000 | 2.90620700  | -0.02926500 |
| C | -5.87380700 | 2.57102200  | -1.37434700 |
| C | -4.72370300 | 2.33380600  | -2.21258100 |
| C | -5.03849900 | 1.24039300  | -3.11846100 |
| C | -4.05724000 | 0.30839700  | -3.44964500 |
| C | -4.38703400 | -1.10448500 | -3.50996800 |
| C | -4.81498100 | -3.43317700 | -1.92737100 |
| C | -3.46456500 | -2.99133000 | -2.21512100 |
| C | -3.25161700 | -1.85057200 | -2.99256800 |
| C | -2.22489900 | -0.89695000 | -2.61507000 |
| C | -2.71815800 | 0.43030500  | -2.89338800 |
| C | -2.41463500 | 1.47392500  | -2.01214000 |
| C | -3.44173100 | 2.44020400  | -1.66269900 |
| C | -3.25261700 | 2.82760600  | -0.29178900 |
| C | -4.35007700 | 3.03256200  | 0.51230800  |
| C | -7.76892100 | 0.22876100  | 1.43481600  |
| C | -5.72923600 | 2.07947600  | 2.17347100  |
| C | -6.71115000 | -0.55665600 | -2.88385900 |
| C | 0.42991500  | 3.42734400  | 0.17922500  |
| C | 1.17175100  | 2.34639100  | 0.67940400  |
| C | 2.56634700  | 2.37612300  | 0.69507500  |
| C | 3.27566000  | 3.47265700  | 0.18735800  |
| C | 2.53319200  | 4.55309800  | -0.31853000 |
| C | 1.14578900  | 4.53463500  | -0.31248900 |
| H | 0.67795500  | 1.47048600  | 1.08168900  |
| H | 3.10333100  | 1.53808700  | 1.12603100  |
| H | 3.05437700  | 5.41542100  | -0.72821100 |
| H | 0.60175700  | 5.39118700  | -0.70575800 |
| N | -0.97580300 | 3.49908700  | 0.19842800  |
| H | -1.20721000 | 2.32641500  | 2.26921200  |
| H | -1.32604500 | 4.23154100  | -0.40659200 |
| N | 4.67767300  | 3.56179500  | 0.21158900  |

|   |             |             |             |
|---|-------------|-------------|-------------|
| H | 5.05204400  | 4.49540800  | 0.30059800  |
| C | 5.62526000  | 2.53921700  | 0.16386000  |
| C | 6.92720200  | 2.79583700  | 0.63225300  |
| C | 5.35901700  | 1.26578900  | -0.37119200 |
| C | 7.92270600  | 1.82833700  | 0.57646400  |
| H | 7.15362400  | 3.76547700  | 1.07055600  |
| C | 6.35914000  | 0.30161200  | -0.43240400 |
| H | 4.37739100  | 1.04018800  | -0.77210400 |
| C | 7.65575900  | 0.56018100  | 0.03619500  |
| H | 8.90337100  | 2.04828700  | 0.98433000  |
| H | 6.13508000  | -0.66768000 | -0.87221800 |
| N | 8.61397200  | -0.47187700 | 0.00569900  |
| H | 8.24819000  | -1.40578100 | 0.13227300  |
| C | 9.98283300  | -0.39288100 | -0.18359200 |
| C | 10.77293400 | -1.52977000 | 0.11161000  |
| C | 10.62939000 | 0.74971500  | -0.71370800 |
| C | 12.14124500 | -1.52080200 | -0.05921400 |
| H | 10.28298400 | -2.42978700 | 0.47996100  |
| C | 11.99503200 | 0.75199600  | -0.90220600 |
| H | 10.04258000 | 1.61333100  | -1.00546900 |
| C | 12.82074400 | -0.36061700 | -0.55200900 |
| H | 12.70895200 | -2.42091200 | 0.14889300  |
| H | 12.49121300 | 1.61931600  | -1.32688000 |
| N | 14.14232100 | -0.23971700 | -0.79900800 |
| C | 15.08890000 | -1.08643400 | -0.26160800 |
| C | 16.25266300 | -1.32453300 | -1.03350300 |
| C | 15.03651000 | -1.64525300 | 1.04112700  |
| C | 17.27955400 | -2.12725300 | -0.55429800 |
| H | 16.30655400 | -0.87071000 | -2.01844500 |
| C | 16.08481700 | -2.42386300 | 1.52301100  |
| H | 14.19075300 | -1.41887500 | 1.68270600  |
| C | 17.20422000 | -2.68472500 | 0.72776500  |
| H | 18.15273500 | -2.31069500 | -1.17552300 |
| H | 16.03080900 | -2.82629300 | 2.53184000  |
| H | 18.01588800 | -3.29880400 | 1.10799600  |

Frequency and Energy at B3LYP/6-31G(d)

|                                          |                             |
|------------------------------------------|-----------------------------|
| Zero-point correction=                   | 0.774411 (Hartree/Particle) |
| Thermal correction to Energy=            | 0.819847                    |
| Thermal correction to Enthalpy=          | 0.820792                    |
| Thermal correction to Gibbs Free Energy= | 0.696209                    |

Energy at B3LYP/6-311++G(d,p)

HF= -3433.076212

| Name of compound                                  |            | C60-L1 cation |             |
|---------------------------------------------------|------------|---------------|-------------|
| Cartesian Coordinates optimized at B3LYP/6-31G(d) |            |               |             |
| C                                                 | 2.46775300 | -0.53793300   | -2.71401100 |
| C                                                 | 3.42109800 | 0.46620900    | -3.14935700 |
| C                                                 | 4.72286900 | 0.08817700    | -3.49968300 |
| C                                                 | 5.12258500 | -1.30711500   | -3.41114600 |
| C                                                 | 4.20662500 | -2.27151400   | -2.99318800 |
| C                                                 | 2.85008400 | -1.88282200   | -2.64365700 |
| C                                                 | 1.62557900 | 0.04645500    | -1.70613000 |
| C                                                 | 1.85145900 | 1.56046400    | -1.64562600 |



|   |             |             |             |
|---|-------------|-------------|-------------|
| C | 3.17309900  | 1.67609300  | -2.41364900 |
| C | 4.23640900  | 2.44617800  | -2.00095300 |
| C | 5.83526100  | 0.90498600  | -3.07995500 |
| C | 6.49213400  | -1.34627100 | -2.92861900 |
| C | 6.88890000  | -2.34777100 | -2.04086700 |
| C | 5.93330000  | -3.35310300 | -1.60430900 |
| C | 4.61904500  | -3.31734900 | -2.07322800 |
| C | 3.51581000  | -3.57084500 | -1.16089200 |
| C | 2.42530600  | -2.68277400 | -1.52049200 |
| C | 1.63887800  | -2.09849100 | -0.52184300 |
| C | 1.23481600  | -0.71367800 | -0.62559400 |
| C | 1.84794800  | 2.20580100  | -0.17983100 |
| C | 1.64729600  | 1.16762900  | 0.95373900  |
| C | 1.26198000  | -0.13683000 | 0.73939500  |
| C | 1.67433900  | -1.18588500 | 1.64628900  |
| C | 1.90870500  | -2.39223500 | 0.87428100  |
| C | 2.94837700  | -3.25421900 | 1.22133700  |
| C | 3.77319100  | -3.85089500 | 0.18272700  |
| C | 5.13854800  | -3.89195600 | 0.66807800  |
| C | 6.19838500  | -3.64697500 | -0.20720800 |
| C | 6.93201500  | 0.02388600  | -2.72190000 |
| C | 7.78153100  | -0.91749100 | 1.71565300  |
| C | 8.18550800  | -0.14241000 | 0.62671100  |
| C | 7.78056300  | 1.24626200  | 0.53595500  |
| C | 6.99340300  | 1.81324100  | 1.54013200  |
| C | 6.57403300  | 1.00768700  | 2.67528000  |
| C | 6.00385000  | -1.33650200 | 3.19573500  |
| C | 6.23705500  | -2.54269500 | 2.42124800  |
| C | 7.33694100  | -2.28494100 | 1.50755100  |
| C | 7.31741900  | -2.82482200 | 0.22071900  |
| C | 7.74334800  | -2.02197600 | -0.91297900 |
| C | 8.16594200  | -0.70603700 | -0.71537800 |
| C | 7.50624100  | 1.54204100  | -0.86181700 |
| C | 6.44501100  | 2.38067700  | -1.19944600 |
| C | 5.62119000  | 2.96670400  | -0.15825500 |
| C | 5.89388000  | 2.69127700  | 1.18541200  |
| C | 4.80225000  | 2.43445300  | 2.09339700  |
| C | 5.21693600  | 1.39327400  | 3.02017000  |
| C | 4.30075400  | 0.43038300  | 3.43777000  |
| C | 4.70099500  | -0.96261500 | 3.53058000  |
| C | 5.15839000  | -3.32829800 | 2.01022600  |
| C | 3.80541000  | -2.93740400 | 2.35308500  |
| C | 3.57840300  | -1.78003000 | 3.10095100  |
| C | 2.48941900  | -0.88994300 | 2.74309500  |
| C | 2.93089000  | 0.46867500  | 2.94836100  |
| C | 2.53067700  | 1.46422300  | 2.05063000  |
| C | 3.48952500  | 2.46297300  | 1.61254600  |
| C | 3.21241800  | 2.79085600  | 0.24082700  |
| C | 4.25476200  | 3.00752500  | -0.63146000 |
| C | 7.75140400  | 0.33511000  | -1.63512300 |
| C | 5.59039600  | 2.05981300  | -2.32922900 |
| C | 6.95950300  | -0.33143400 | 2.75957100  |
| C | -0.48853600 | 3.27402700  | -0.18965400 |
| C | -1.22466300 | 2.10009100  | -0.47338200 |

|   |              |             |             |
|---|--------------|-------------|-------------|
| C | -2.60940100  | 2.12739200  | -0.54151100 |
| C | -3.32288300  | 3.31842400  | -0.31684300 |
| C | -2.59304500  | 4.49762000  | -0.05939800 |
| C | -1.21562900  | 4.47731200  | 0.00271200  |
| H | -0.71682700  | 1.16364800  | -0.66305600 |
| H | -3.13706300  | 1.21998200  | -0.81288300 |
| H | -3.12222600  | 5.43203400  | 0.11145300  |
| H | -0.67625400  | 5.39774800  | 0.21092100  |
| N | 0.87949000   | 3.31821100  | -0.12061500 |
| H | 1.05894800   | 2.08388600  | -2.19617500 |
| H | 1.28170600   | 4.20990400  | 0.13349500  |
| N | -4.71715400  | 3.40493000  | -0.39793900 |
| H | -5.07108200  | 4.31486400  | -0.66940900 |
| C | -5.68440900  | 2.45344900  | -0.15694600 |
| C | -6.99656100  | 2.68840600  | -0.63459600 |
| C | -5.44303200  | 1.26500900  | 0.57304300  |
| C | -8.01809300  | 1.78967000  | -0.40763700 |
| H | -7.19599700  | 3.57991300  | -1.22401600 |
| C | -6.46491000  | 0.36668000  | 0.79986500  |
| H | -4.46442700  | 1.07657500  | 0.99714900  |
| C | -7.77679700  | 0.60220200  | 0.32302800  |
| H | -8.99613200  | 1.97743300  | -0.83353300 |
| H | -6.26539500  | -0.52503200 | 1.38893300  |
| N | -8.74538900  | -0.35033400 | 0.56389100  |
| H | -8.39117100  | -1.26468900 | 0.81989900  |
| C | -10.13842100 | -0.25741100 | 0.51054900  |
| C | -10.87928800 | -1.43558800 | 0.29037700  |
| C | -10.84158800 | 0.94317100  | 0.73625700  |
| C | -12.26131400 | -1.42141600 | 0.25286900  |
| H | -10.35539100 | -2.37745100 | 0.14472600  |
| C | -12.22332600 | 0.96239900  | 0.69012400  |
| H | -10.30653800 | 1.85254900  | 0.98420700  |
| C | -12.97059000 | -0.21087600 | 0.43198800  |
| H | -12.80098000 | -2.34870300 | 0.10550300  |
| H | -12.74750900 | 1.89761300  | 0.87070400  |
| N | -14.34551600 | -0.13058500 | 0.42029900  |
| H | -14.73479800 | 0.71433400  | 0.81860200  |
| C | -15.29568400 | -1.08751400 | 0.00091900  |
| C | -16.51492600 | -1.16126800 | 0.69187100  |
| C | -15.08174900 | -1.91165800 | -1.11478500 |
| C | -17.49895800 | -2.05630600 | 0.28072400  |
| H | -16.68158300 | -0.52351300 | 1.55663600  |
| C | -16.06777700 | -2.81573200 | -1.50670700 |
| H | -14.16712900 | -1.82115500 | -1.69104400 |
| C | -17.27735400 | -2.89509400 | -0.81403700 |
| H | -18.43807300 | -2.10383400 | 0.82414100  |
| H | -15.89432600 | -3.44738100 | -2.37322100 |
| H | -18.04321100 | -3.59697400 | -1.12922200 |

Frequency and Energy at B3LYP/6-31G(d)

|                                          |                             |
|------------------------------------------|-----------------------------|
| Zero-point correction=                   | 0.789202 (Hartree/Particle) |
| Thermal correction to Energy=            | 0.834625                    |
| Thermal correction to Enthalpy=          | 0.835569                    |
| Thermal correction to Gibbs Free Energy= | 0.710935                    |

Energy at B3LYP/6-311++G(d,p)

HF= -3433.506230

| Name of compound                                  | C60-L1 anion |             |             |
|---------------------------------------------------|--------------|-------------|-------------|
| Cartesian Coordinates optimized at B3LYP/6-31G(d) |              |             |             |
| C                                                 | -3.05795200  | 0.79054400  | 2.89388800  |
| C                                                 | -4.04333700  | 1.81919900  | 2.64740300  |
| C                                                 | -5.41336100  | 1.54672900  | 2.84195900  |
| C                                                 | -5.83023700  | 0.21573400  | 3.26000400  |
| C                                                 | -4.87952700  | -0.77665200 | 3.49779300  |
| C                                                 | -3.46155600  | -0.48767400 | 3.32769700  |
| C                                                 | -1.99831200  | 0.93994300  | 1.93605000  |
| C                                                 | -2.15079500  | 2.26690800  | 1.18632600  |
| C                                                 | -3.60316500  | 2.61283700  | 1.53570900  |
| C                                                 | -4.52213100  | 3.07009900  | 0.61502400  |
| C                                                 | -6.37021500  | 2.02657300  | 1.88426800  |
| C                                                 | -7.06842600  | -0.11054800 | 2.57200100  |
| C                                                 | -7.30169300  | -1.42785600 | 2.14066400  |
| C                                                 | -6.31574300  | -2.45694300 | 2.38731800  |
| C                                                 | -5.12139400  | -2.14002900 | 3.05903200  |
| C                                                 | -3.86070400  | -2.67903100 | 2.59430700  |
| C                                                 | -2.83927900  | -1.65327300 | 2.76452100  |
| C                                                 | -1.83058100  | -1.50712700 | 1.79992100  |
| C                                                 | -1.40646400  | -0.18025500 | 1.39010500  |
| C                                                 | -1.80324900  | 2.23099800  | -0.37296100 |
| C                                                 | -1.40131000  | 0.82553800  | -0.88405200 |
| C                                                 | -1.11426800  | -0.23874600 | -0.05584000 |
| C                                                 | -1.36332800  | -1.60219200 | -0.48878600 |
| C                                                 | -1.78885900  | -2.38197200 | 0.65099100  |
| C                                                 | -2.76928500  | -3.38568900 | 0.49109900  |
| C                                                 | -3.82124100  | -3.52168100 | 1.47642400  |
| C                                                 | -5.05689500  | -3.85315300 | 0.78233100  |
| C                                                 | -6.27399800  | -3.32831400 | 1.22780600  |
| C                                                 | -7.39715700  | 1.00645200  | 1.71204000  |
| C                                                 | -7.29989200  | -1.77594700 | -1.96697200 |
| C                                                 | -7.90428100  | -0.63968000 | -1.42239200 |
| C                                                 | -7.47998900  | 0.68682400  | -1.84444300 |
| C                                                 | -6.46697200  | 0.81461900  | -2.80471200 |
| C                                                 | -5.84514800  | -0.36150800 | -3.37306200 |
| C                                                 | -5.26556300  | -2.67220600 | -2.71744000 |
| C                                                 | -5.69819400  | -3.44540700 | -1.56777400 |
| C                                                 | -6.96244200  | -2.89661200 | -1.10486400 |
| C                                                 | -7.24353000  | -2.83880300 | 0.26139500  |
| C                                                 | -7.87573700  | -1.65846700 | 0.82725500  |
| C                                                 | -8.19702800  | -0.57971000 | -0.00119000 |
| C                                                 | -7.51767300  | 1.56323100  | -0.69395900 |
| C                                                 | -6.51309600  | 2.54193700  | -0.52732400 |
| C                                                 | -5.46088000  | 2.66816100  | -1.50989300 |
| C                                                 | -5.43640100  | 1.83036200  | -2.63367800 |
| C                                                 | -4.18743600  | 1.29240700  | -3.09904700 |
| C                                                 | -4.43036500  | -0.07294500 | -3.54213100 |
| C                                                 | -3.47978900  | -1.06406100 | -3.30393900 |
| C                                                 | -3.89700300  | -2.39146100 | -2.88762300 |
| C                                                 | -4.76439900  | -3.91261000 | -0.63825400 |

|   |             |             |             |
|---|-------------|-------------|-------------|
| C | -3.34964600 | -3.61825600 | -0.81358400 |
| C | -2.93129800 | -2.87014900 | -1.92230100 |
| C | -1.91054700 | -1.84349000 | -1.75662700 |
| C | -2.23866600 | -0.73638400 | -2.61257300 |
| C | -2.01034900 | 0.57722200  | -2.16238100 |
| C | -3.00159900 | 1.60315900  | -2.40586800 |
| C | -3.02269000 | 2.49359900  | -1.28084700 |
| C | -4.22258100 | 2.99866500  | -0.82595100 |
| C | -7.95241800 | 0.78344000  | 0.44550000  |
| C | -5.93367000 | 2.76999700  | 0.77700400  |
| C | -6.25125800 | -1.64391100 | -2.96321800 |
| C | 0.54390400  | 3.26448600  | -0.37446100 |
| C | 1.11904300  | 2.42759800  | 0.60145600  |
| C | 2.47824300  | 2.50505300  | 0.89783700  |
| C | 3.32656100  | 3.38409800  | 0.21327500  |
| C | 2.75984800  | 4.21270600  | -0.76547300 |
| C | 1.39991700  | 4.16480300  | -1.04286100 |
| H | 0.51097500  | 1.71755600  | 1.14760600  |
| H | 2.88371900  | 1.87285200  | 1.68228200  |
| H | 3.39575200  | 4.90056900  | -1.31960900 |
| H | 0.98561100  | 4.82707900  | -1.80064400 |
| N | -0.81557300 | 3.29391100  | -0.67385200 |
| H | -1.47959000 | 3.02643500  | 1.60803400  |
| H | -1.02011200 | 3.75799300  | -1.54922600 |
| N | 4.70334600  | 3.49685600  | 0.53003000  |
| H | 5.09394100  | 4.42158300  | 0.41535800  |
| C | 5.64456100  | 2.46919200  | 0.57363300  |
| C | 6.97124700  | 2.77601800  | 0.93601000  |
| C | 5.34120400  | 1.12836800  | 0.27693600  |
| C | 7.94984300  | 1.79201300  | 1.00692500  |
| H | 7.22798200  | 3.80269900  | 1.19048600  |
| C | 6.33079900  | 0.15066300  | 0.33038000  |
| H | 4.33576100  | 0.85512000  | -0.02180300 |
| C | 7.64798300  | 0.45700500  | 0.69598100  |
| H | 8.95301400  | 2.05584500  | 1.32792100  |
| H | 6.07380200  | -0.87474100 | 0.07248800  |
| N | 8.60798800  | -0.57463200 | 0.81575100  |
| H | 8.23299400  | -1.48082700 | 1.05921400  |
| C | 9.90001700  | -0.59710700 | 0.29194300  |
| C | 10.73540200 | -1.69229500 | 0.58898300  |
| C | 10.41959700 | 0.41487600  | -0.53480200 |
| C | 12.02518100 | -1.77978600 | 0.08046900  |
| H | 10.35412100 | -2.49562200 | 1.21629600  |
| C | 11.72740800 | 0.34204900  | -1.00659500 |
| H | 9.79790500  | 1.25932500  | -0.80960500 |
| C | 12.55527800 | -0.74947200 | -0.71259500 |
| H | 12.62641100 | -2.65826500 | 0.29284600  |
| H | 12.11152900 | 1.14849300  | -1.62817600 |
| N | 13.84936200 | -0.82207800 | -1.27388200 |
| H | 13.95358500 | -0.38140100 | -2.17688800 |
| C | 15.04276800 | -1.17402200 | -0.64802900 |
| C | 16.20472800 | -1.29936700 | -1.43649600 |
| C | 15.14991700 | -1.39632600 | 0.73784300  |
| C | 17.42483600 | -1.63560700 | -0.85976900 |

|                                          |             |             |                             |
|------------------------------------------|-------------|-------------|-----------------------------|
| H                                        | 16.13702000 | -1.13444800 | -2.51032100                 |
| C                                        | 16.37772800 | -1.74229100 | 1.29982200                  |
| H                                        | 14.27780800 | -1.27966300 | 1.37112800                  |
| C                                        | 17.52506600 | -1.86718200 | 0.51471300                  |
| H                                        | 18.30412100 | -1.72304600 | -1.49368500                 |
| H                                        | 16.43452300 | -1.90583600 | 2.37350400                  |
| H                                        | 18.47677300 | -2.13755500 | 0.96281900                  |
| Frequency and Energy at B3LYP/6-31G(d)   |             |             |                             |
| Zero-point correction=                   |             |             | 0.782574 (Hartree/Particle) |
| Thermal correction to Energy=            |             |             | 0.829048                    |
| Thermal correction to Enthalpy=          |             |             | 0.829992                    |
| Thermal correction to Gibbs Free Energy= |             |             | 0.701535                    |
| Energy at B3LYP/6-311++G(d,p)            |             |             |                             |
| HF= -3433.810724                         |             |             |                             |

| Name of compound                                  |             | C60-L2      |             |
|---------------------------------------------------|-------------|-------------|-------------|
| Cartesian Coordinates optimized at B3LYP/6-31G(d) |             |             |             |
| C                                                 | -0.23431100 | -1.64455800 | -1.57293000 |
| C                                                 | 0.54966900  | -1.09936300 | -2.66556500 |
| C                                                 | 1.61154500  | -1.83780300 | -3.20260700 |
| C                                                 | 1.94037700  | -3.14124500 | -2.64811200 |
| C                                                 | 1.18682100  | -3.66524500 | -1.59837800 |
| C                                                 | 0.07023200  | -2.90933400 | -1.05436300 |
| C                                                 | -0.62144500 | -0.55983900 | -0.71262600 |
| C                                                 | -0.31046900 | 0.78019000  | -1.38178300 |
| C                                                 | 0.64788900  | 0.32360800  | -2.48406900 |
| C                                                 | 1.82610500  | 0.96330000  | -2.79374400 |
| C                                                 | 2.84233800  | -1.16395700 | -3.53650500 |
| C                                                 | 3.38772500  | -3.26599400 | -2.63756300 |
| C                                                 | 4.02417600  | -3.90752400 | -1.57327800 |
| C                                                 | 3.23843600  | -4.45427000 | -0.47888100 |
| C                                                 | 1.84738700  | -4.33676000 | -0.49225400 |
| C                                                 | 1.13522100  | -3.99419600 | 0.72838100  |
| C                                                 | 0.03674000  | -3.11451900 | 0.37301800  |
| C                                                 | -0.30153900 | -2.04416800 | 1.20870500  |
| C                                                 | -0.64158900 | -0.75484400 | 0.65036100  |
| C                                                 | 0.22425800  | 1.94111500  | -0.42114400 |
| C                                                 | 0.41034700  | 1.46272500  | 1.04888400  |
| C                                                 | -0.09591300 | 0.28405900  | 1.55451500  |
| C                                                 | 0.56074200  | -0.39600000 | 2.64881300  |
| C                                                 | 0.43768600  | -1.82724500 | 2.43948100  |
| C                                                 | 1.48372500  | -2.68039000 | 2.79013200  |
| C                                                 | 1.84475600  | -3.78244800 | 1.91253800  |
| C                                                 | 3.28914200  | -3.90688100 | 1.92614000  |
| C                                                 | 3.97391900  | -4.23575200 | 0.75406000  |
| C                                                 | 3.94572000  | -2.04040100 | -3.18701700 |
| C                                                 | 6.28827500  | -1.35463200 | 0.73162500  |
| C                                                 | 6.31294300  | -1.15540200 | -0.65059800 |
| C                                                 | 5.97867500  | 0.14260300  | -1.20278900 |
| C                                                 | 5.63571500  | 1.19742800  | -0.35374400 |
| C                                                 | 5.61117900  | 0.99095000  | 1.08557400  |
| C                                                 | 5.14399500  | -0.80664800 | 2.71117900  |
| C                                                 | 5.01747000  | -2.23798700 | 2.50131000  |

|   |              |             |             |
|---|--------------|-------------|-------------|
| C | 5.72579300   | -2.57758300 | 1.27864500  |
| C | 5.21431300   | -3.55490300 | 0.42318100  |
| C | 5.24434500   | -3.35218900 | -1.01548100 |
| C | 5.77939800   | -2.17510600 | -1.54263800 |
| C | 5.23420500   | -0.07294100 | -2.43357800 |
| C | 4.16621000   | 0.76505800  | -2.75514100 |
| C | 3.80412800   | 1.85789400  | -1.87160900 |
| C | 4.53220000   | 2.07433900  | -0.69783000 |
| C | 3.82645000   | 2.40648100  | 0.51556500  |
| C | 4.49115700   | 1.74232300  | 1.62502800  |
| C | 3.73787600   | 1.21986700  | 2.67436800  |
| C | 4.07061100   | -0.07978600 | 3.23060300  |
| C | 3.82221200   | -2.88719400 | 2.81826800  |
| C | 2.70687100   | -2.13242400 | 3.35493400  |
| C | 2.82650700   | -0.75585400 | 3.56040800  |
| C | 1.73079400   | 0.12825700  | 3.20802800  |
| C | 2.28825800   | 1.34093100  | 2.65979500  |
| C | 1.64489800   | 1.96840100  | 1.58611700  |
| C | 2.43201800   | 2.50502000  | 0.49107000  |
| C | 1.68914800   | 2.33724400  | -0.72679600 |
| C | 2.36329300   | 1.99335700  | -1.87782700 |
| C | 5.11810200   | -1.50690700 | -2.64636900 |
| C | 2.94656200   | 0.21493900  | -3.31918200 |
| C | 5.93074400   | -0.26039300 | 1.61694300  |
| C | -2.08299800  | 2.99862200  | -0.61134200 |
| C | -2.81248200  | 2.14197400  | 0.22446600  |
| C | -4.20386400  | 2.06414200  | 0.15300400  |
| C | -4.92189900  | 2.86001900  | -0.75305200 |
| C | -4.19241800  | 3.73922700  | -1.57790900 |
| C | -2.80868400  | 3.80063700  | -1.51058500 |
| H | -2.30066200  | 1.53430400  | 0.96066500  |
| H | -4.73196800  | 1.40660700  | 0.83446300  |
| H | -4.72351500  | 4.36335500  | -2.29380100 |
| H | -2.26569500  | 4.47529700  | -2.16569600 |
| N | -0.65543200  | 3.13061800  | -0.60278500 |
| H | -1.22370600  | 1.18141400  | -1.83822100 |
| N | -6.31438600  | 2.85198500  | -0.84720800 |
| H | -6.72554500  | 3.68387400  | -1.24571000 |
| C | -7.22576200  | 1.87490600  | -0.41692700 |
| C | -6.92616600  | 0.50276200  | -0.40400200 |
| C | -8.51896000  | 2.26826700  | -0.03534900 |
| C | -7.87246600  | -0.43478900 | -0.00058100 |
| H | -5.94380000  | 0.16258900  | -0.71316000 |
| C | -9.47795200  | 1.32849400  | 0.32226900  |
| H | -8.77650800  | 3.32512200  | -0.02958500 |
| C | -9.17286300  | -0.04235600 | 0.35816800  |
| H | -7.59572500  | -1.48265800 | 0.03697500  |
| H | -10.47920800 | 1.65980300  | 0.58868600  |
| N | -10.15100000 | -0.94504700 | 0.80057000  |
| H | -10.83180800 | -0.56586500 | 1.44296400  |
| C | -10.32365600 | -2.29255800 | 0.47459900  |
| C | -11.09273900 | -3.09818200 | 1.33533700  |
| C | -9.80287000  | -2.86906100 | -0.69800500 |
| C | -11.32933200 | -4.43602000 | 1.03443900  |

|                                          |              |             |                             |
|------------------------------------------|--------------|-------------|-----------------------------|
| H                                        | -11.49803200 | -2.66510900 | 2.24773400                  |
| C                                        | -10.03478900 | -4.21458100 | -0.97938900                 |
| H                                        | -9.24090800  | -2.25970100 | -1.39688900                 |
| C                                        | -10.79551800 | -5.01048000 | -0.12160200                 |
| H                                        | -11.92810200 | -5.03532500 | 1.71564700                  |
| H                                        | -9.62382200  | -4.63868700 | -1.89221000                 |
| H                                        | -10.97222300 | -6.05722900 | -0.35040700                 |
| C                                        | -0.17656500  | 4.40258500  | -0.12300100                 |
| C                                        | -0.50667700  | 4.87560400  | 1.15488500                  |
| C                                        | 0.61031000   | 5.21786500  | -0.94695400                 |
| C                                        | -0.05741200  | 6.11401400  | 1.60036600                  |
| H                                        | -1.13167800  | 4.26750800  | 1.80255800                  |
| C                                        | 1.07421600   | 6.45294600  | -0.50405700                 |
| H                                        | 0.86077200   | 4.87183600  | -1.94483900                 |
| C                                        | 0.74821700   | 6.92263700  | 0.77943300                  |
| H                                        | -0.33139400  | 6.46361200  | 2.59350400                  |
| H                                        | 1.68267300   | 7.06921200  | -1.16231300                 |
| N                                        | 1.15781800   | 8.18909300  | 1.20430800                  |
| H                                        | 1.99208600   | 8.54176100  | 0.75171800                  |
| H                                        | 1.20554000   | 8.30724000  | 2.20885100                  |
| Frequency and Energy at B3LYP/6-31G(d)   |              |             |                             |
| Zero-point correction=                   |              |             | 0.786238 (Hartree/Particle) |
| Thermal correction to Energy=            |              |             | 0.832367                    |
| Thermal correction to Enthalpy=          |              |             | 0.833312                    |
| Thermal correction to Gibbs Free Energy= |              |             | 0.707952                    |
| Energy at B3LYP/6-311++G(d,p)            |              |             |                             |
| HF= -3433.704021                         |              |             |                             |

| Name of compound                                  | C60-L2-N1-H radical |             |             |
|---------------------------------------------------|---------------------|-------------|-------------|
| Cartesian Coordinates optimized at B3LYP/6-31G(d) |                     |             |             |
| C                                                 | -0.06157900         | -1.40897400 | -1.94133800 |
| C                                                 | 0.82533800          | -0.75545900 | -2.88551600 |
| C                                                 | 1.93668500          | -1.44065700 | -3.39193900 |
| C                                                 | 2.21111000          | -2.79985000 | -2.95433400 |
| C                                                 | 1.35766200          | -3.42847800 | -2.04822200 |
| C                                                 | 0.19196000          | -2.72556100 | -1.53742500 |
| C                                                 | -0.53391000         | -0.42168300 | -1.00948700 |
| C                                                 | -0.15891500         | 0.98092700  | -1.49345300 |
| C                                                 | 0.90303700          | 0.63823100  | -2.54076300 |
| C                                                 | 2.10567100          | 1.29585800  | -2.65923000 |
| C                                                 | 3.19381100          | -0.74590500 | -3.52666900 |
| C                                                 | 3.65056300          | -2.93844900 | -2.81494200 |
| C                                                 | 4.17963300          | -3.69902100 | -1.77038700 |
| C                                                 | 3.28956200          | -4.35413800 | -0.82533300 |
| C                                                 | 1.90649600          | -4.22325000 | -0.96293500 |
| C                                                 | 1.07656600          | -4.00893100 | 0.21179600  |
| C                                                 | 0.01751600          | -3.08530100 | -0.15155000 |
| C                                                 | -0.40462400         | -2.11028900 | 0.75958200  |
| C                                                 | -0.68862300         | -0.76407500 | 0.31497200  |
| C                                                 | 0.27865500          | 2.02189900  | -0.36125200 |
| C                                                 | 0.32025600          | 1.38451500  | 1.05608600  |
| C                                                 | -0.23457600         | 0.16364200  | 1.37582900  |
| C                                                 | 0.31072000          | -0.63743900 | 2.44897500  |

|   |             |             |             |
|---|-------------|-------------|-------------|
| C | 0.21008700  | -2.03585900 | 2.07299700  |
| C | 1.21758000  | -2.93176900 | 2.42914900  |
| C | 1.66537400  | -3.93451900 | 1.47600200  |
| C | 3.10127500  | -4.07350600 | 1.61851700  |
| C | 3.89885600  | -4.27885400 | 0.49088300  |
| C | 4.25827500  | -1.66544600 | -3.16781000 |
| C | 6.19989300  | -1.43462800 | 1.01312500  |
| C | 6.36178100  | -1.08579800 | -0.32955700 |
| C | 6.08195800  | 0.26810000  | -0.76577700 |
| C | 5.65451300  | 1.22634200  | 0.15643800  |
| C | 5.48761600  | 0.86416000  | 1.55463600  |
| C | 4.86480800  | -1.09594100 | 2.91893100  |
| C | 4.76199700  | -2.49448000 | 2.54150500  |
| C | 5.58810900  | -2.70500400 | 1.36455000  |
| C | 5.16490800  | -3.57764300 | 0.36063700  |
| C | 5.33787000  | -3.21948700 | -1.03701000 |
| C | 5.92148700  | -1.99698900 | -1.37653000 |
| C | 5.46254200  | 0.19506900  | -2.07983900 |
| C | 4.43072100  | 1.07289400  | -2.41129700 |
| C | 3.98078600  | 2.06456800  | -1.45243400 |
| C | 4.58867900  | 2.14529500  | -0.19631800 |
| C | 3.76665600  | 2.35146000  | 0.97083900  |
| C | 4.31934200  | 1.56342400  | 2.06053400  |
| C | 3.46672900  | 0.93619200  | 2.96661200  |
| C | 3.74452900  | -0.41985800 | 3.40659000  |
| C | 3.54194600  | -3.16294600 | 2.66569000  |
| C | 2.37799200  | -2.46063900 | 3.16894000  |
| C | 2.47479700  | -1.11627100 | 3.53541200  |
| C | 1.41858000  | -0.18880500 | 3.17479300  |
| C | 2.02564400  | 1.07170600  | 2.82239900  |
| C | 1.49099500  | 1.82105800  | 1.76728700  |
| C | 2.38139400  | 2.46806800  | 0.82105600  |
| C | 1.76271000  | 2.44034600  | -0.47631100 |
| C | 2.54779600  | 2.21113300  | -1.58517800 |
| C | 5.37062300  | -1.20565400 | -2.45950200 |
| C | 3.27407400  | 0.59954100  | -3.15047100 |
| C | 5.75424300  | -0.44071100 | 1.97350400  |
| C | -2.04588600 | 3.02630300  | -0.58747300 |
| C | -2.82059300 | 2.19657300  | 0.23552700  |
| C | -4.19452800 | 2.06445200  | 0.04415600  |
| C | -4.84950500 | 2.77222500  | -0.97964000 |
| C | -4.07436800 | 3.62564700  | -1.79196700 |
| C | -2.70652200 | 3.74505700  | -1.59970200 |
| H | -2.35647300 | 1.65978200  | 1.05411600  |
| H | -4.76472100 | 1.43568000  | 0.71817500  |
| H | -4.55561100 | 4.18342900  | -2.59259200 |
| H | -2.12440300 | 4.39768900  | -2.24379400 |
| N | -0.62846400 | 3.21206800  | -0.45449900 |
| H | -1.02474800 | 1.43909600  | -1.98736000 |
| N | -6.21917800 | 2.69926200  | -1.20607200 |
| H | -6.60863500 | 3.45972600  | -1.74515200 |
| C | -7.15165000 | 1.76454000  | -0.71791700 |
| C | -6.84961500 | 0.40420500  | -0.55077200 |
| C | -8.46132500 | 2.18721700  | -0.44184500 |



|   |              |             |             |
|---|--------------|-------------|-------------|
| C | -7.81074500  | -0.49413900 | -0.09580000 |
| H | -5.85362600  | 0.04025500  | -0.77972800 |
| C | -9.43372000  | 1.28340600  | -0.03300400 |
| H | -8.72078800  | 3.23703800  | -0.55834500 |
| C | -9.12744500  | -0.07502100 | 0.16045800  |
| H | -7.53257900  | -1.52982300 | 0.06313100  |
| H | -10.44698400 | 1.63375700  | 0.15049100  |
| N | -10.12622300 | -0.92834900 | 0.64443500  |
| H | -10.84980600 | -0.48018100 | 1.18823200  |
| C | -10.24764000 | -2.31634100 | 0.52153200  |
| C | -11.03659200 | -3.00513100 | 1.46127800  |
| C | -9.66021100  | -3.04528700 | -0.52767600 |
| C | -11.22790400 | -4.37956500 | 1.35686400  |
| H | -11.49348900 | -2.45187100 | 2.27936100  |
| C | -9.84627800  | -4.42451400 | -0.61107300 |
| H | -9.08414400  | -2.53033400 | -1.28825400 |
| C | -10.62696800 | -5.10431800 | 0.32505700  |
| H | -11.84341400 | -4.88768500 | 2.09475200  |
| H | -9.38414600  | -4.96881100 | -1.43079800 |
| H | -10.76818200 | -6.17841700 | 0.25036400  |
| C | -0.23165400  | 4.47736700  | 0.05869600  |
| C | -0.90700600  | 5.04911300  | 1.16477000  |
| C | 0.79398700   | 5.23127700  | -0.56493000 |
| C | -0.55820600  | 6.29161500  | 1.64736800  |
| H | -1.70740500  | 4.48793800  | 1.63679100  |
| C | 1.15094200   | 6.47327300  | -0.08869200 |
| H | 1.28001700   | 4.82893200  | -1.44585800 |
| C | 0.49590300   | 7.06317200  | 1.04598600  |
| H | -1.07807200  | 6.70441700  | 2.50960400  |
| H | 1.92589500   | 7.05877200  | -0.57355700 |
| N | 0.89445300   | 8.26960800  | 1.45014900  |
| H | 0.33129700   | 8.55276000  | 2.26238600  |

Frequency and Energy at B3LYP/6-31G(d)

|                                          |                             |
|------------------------------------------|-----------------------------|
| Zero-point correction=                   | 0.773414 (Hartree/Particle) |
| Thermal correction to Energy=            | 0.818985                    |
| Thermal correction to Enthalpy=          | 0.819929                    |
| Thermal correction to Gibbs Free Energy= | 0.695573                    |

Energy at B3LYP/6-311++G(d,p)

HF= -3433.052621

| Name of compound                                  | C60-L2-N3-H radical |             |             |
|---------------------------------------------------|---------------------|-------------|-------------|
| Cartesian Coordinates optimized at B3LYP/6-31G(d) |                     |             |             |
| C                                                 | -0.38975100         | -1.73274300 | -1.26731000 |
| C                                                 | 0.29260600          | -1.21992100 | -2.44032400 |
| C                                                 | 1.31336900          | -1.96990600 | -3.03840500 |
| C                                                 | 1.69960600          | -3.25139800 | -2.47003300 |
| C                                                 | 1.04173100          | -3.74441600 | -1.34370900 |
| C                                                 | -0.03163300         | -2.97699300 | -0.73386300 |
| C                                                 | -0.71272400         | -0.62234200 | -0.41451000 |
| C                                                 | -0.47547600         | 0.69820300  | -1.15185200 |
| C                                                 | 0.39186900          | 0.20951500  | -2.31601900 |
| C                                                 | 1.53627000          | 0.84351400  | -2.74199700 |
| C                                                 | 2.50617600          | -1.30044400 | -3.49657100 |

|   |             |             |             |
|---|-------------|-------------|-------------|
| C | 3.14393200  | -3.36693500 | -2.57688500 |
| C | 3.87291600  | -3.96860500 | -1.54919500 |
| C | 3.18644700  | -4.48228400 | -0.37473200 |
| C | 1.79827000  | -4.37432800 | -0.27515100 |
| C | 1.18766600  | -3.99501400 | 0.98917600  |
| C | 0.05651700  | -3.13376200 | 0.69743700  |
| C | -0.21981800 | -2.03808200 | 1.52256900  |
| C | -0.61461700 | -0.77074000 | 0.95094100  |
| C | 0.13043400  | 1.89506700  | -0.27559500 |
| C | 0.44037200  | 1.46974700  | 1.18966900  |
| C | -0.00735500 | 0.30277900  | 1.77145200  |
| C | 0.74441600  | -0.33603900 | 2.82894700  |
| C | 0.61709000  | -1.77440300 | 2.67883100  |
| C | 1.69571200  | -2.60919700 | 2.96948900  |
| C | 1.99203700  | -3.73818600 | 2.10184800  |
| C | 3.43357700  | -3.85302100 | 1.99802500  |
| C | 4.02034900  | -4.21677500 | 0.78419800  |
| C | 3.64290200  | -2.15730100 | -3.21086200 |
| C | 6.29914700  | -1.32463600 | 0.47138500  |
| C | 6.20598900  | -1.17240100 | -0.91380900 |
| C | 5.81510600  | 0.10418000  | -1.47886400 |
| C | 5.53494400  | 1.18500100  | -0.63935200 |
| C | 5.63289200  | 1.02754500  | 0.80308200  |
| C | 5.31964200  | -0.71669700 | 2.52058400  |
| C | 5.18913400  | -2.15519000 | 2.37015300  |
| C | 5.79538700  | -2.53181100 | 1.10427500  |
| C | 5.22256400  | -3.54056800 | 0.32780400  |
| C | 5.13037700  | -3.38704500 | -1.11439200 |
| C | 5.60912500  | -2.22523400 | -1.72349900 |
| C | 4.97210500  | -0.15801400 | -2.63453300 |
| C | 3.87360800  | 0.66182200  | -2.89354200 |
| C | 3.57669000  | 1.78053100  | -2.01866100 |
| C | 4.39869200  | 2.04252700  | -0.91867700 |
| C | 3.79393700  | 2.41141400  | 0.33825900  |
| C | 4.55524000  | 1.78977700  | 1.40925800  |
| C | 3.89691400  | 1.29867700  | 2.53481400  |
| C | 4.28706500  | 0.02094100  | 3.10413700  |
| C | 4.03012800  | -2.80024400 | 2.80765300  |
| C | 2.95711800  | -2.03459600 | 3.41068900  |
| C | 3.08106500  | -0.65125800 | 3.55982700  |
| C | 1.95171600  | 0.21348500  | 3.27053500  |
| C | 2.45002500  | 1.41093200  | 2.63850200  |
| C | 1.71293200  | 1.99967100  | 1.60353800  |
| C | 2.40186300  | 2.50103600  | 0.42870200  |
| C | 1.56211700  | 2.28520500  | -0.71668700 |
| C | 2.13952500  | 1.90444300  | -1.90695800 |
| C | 4.85163500  | -1.59904700 | -2.78935300 |
| C | 2.61573600  | 0.08529400  | -3.33458700 |
| C | 6.00623700  | -0.20322200 | 1.34648900  |
| C | -2.15922000 | 3.02970000  | -0.23148400 |
| C | -2.82531300 | 2.00087100  | 0.46401800  |
| C | -4.21073100 | 1.96346400  | 0.55207600  |
| C | -5.02179200 | 2.97838000  | -0.02206700 |
| C | -4.33130800 | 4.04888500  | -0.65743200 |

|   |              |             |             |
|---|--------------|-------------|-------------|
| C | -2.95816900  | 4.06269500  | -0.78366400 |
| H | -2.25973500  | 1.23206900  | 0.97131800  |
| H | -4.67489600  | 1.17505700  | 1.13533000  |
| H | -4.93017400  | 4.85081500  | -1.07825100 |
| H | -2.47675200  | 4.88060600  | -1.30841000 |
| N | -0.75748400  | 3.08931900  | -0.40168500 |
| H | -1.42849500  | 1.07668600  | -1.54071000 |
| N | -6.38024900  | 3.07875300  | 0.05970200  |
| C | -7.20479100  | 2.00663800  | 0.21523200  |
| C | -6.92820000  | 0.65669900  | -0.14760500 |
| C | -8.51533600  | 2.27329600  | 0.70644400  |
| C | -7.87369600  | -0.34646700 | -0.00620700 |
| H | -5.96538700  | 0.40894600  | -0.58073300 |
| C | -9.45074400  | 1.27262300  | 0.86547400  |
| H | -8.75291900  | 3.30098200  | 0.96333400  |
| C | -9.15521300  | -0.06355600 | 0.50967400  |
| H | -7.61501000  | -1.36293600 | -0.28030100 |
| H | -10.44101700 | 1.51173500  | 1.24859600  |
| N | -10.13064400 | -1.03468700 | 0.71858300  |
| H | -10.84860600 | -0.78333400 | 1.38411000  |
| C | -10.26508600 | -2.31095600 | 0.15482600  |
| C | -10.96850200 | -3.29051100 | 0.87833800  |
| C | -9.77738400  | -2.63376700 | -1.12338800 |
| C | -11.16960100 | -4.55914500 | 0.34215700  |
| H | -11.34789000 | -3.05033200 | 1.86928800  |
| C | -9.97034700  | -3.91325500 | -1.64180200 |
| H | -9.27621300  | -1.87826300 | -1.71776800 |
| C | -10.66349200 | -4.88509100 | -0.91821000 |
| H | -11.71669400 | -5.29990800 | 0.91942400  |
| H | -9.58678200  | -4.14352600 | -2.63241500 |
| H | -10.81225300 | -5.87827400 | -1.33142600 |
| C | -0.16023400  | 4.39480600  | -0.28578900 |
| C | -0.16341200  | 5.07447300  | 0.93975000  |
| C | 0.40735100   | 5.02858300  | -1.39830200 |
| C | 0.39845600   | 6.34046600  | 1.05738400  |
| H | -0.61469500  | 4.60134700  | 1.80711900  |
| C | 0.97724400   | 6.29276700  | -1.28730900 |
| H | 0.40035900   | 4.52126000  | -2.35781500 |
| C | 0.98464200   | 6.97071000  | -0.05545000 |
| H | 0.38364800   | 6.85177400  | 2.01723300  |
| H | 1.41015900   | 6.76866400  | -2.16421000 |
| N | 1.50170200   | 8.26108200  | 0.04581500  |
| H | 2.19422400   | 8.50723300  | -0.65002500 |
| H | 1.78584000   | 8.54324200  | 0.97538500  |

Frequency and Energy at B3LYP/6-31G(d)

|                                          |                             |
|------------------------------------------|-----------------------------|
| Zero-point correction=                   | 0.774048 (Hartree/Particle) |
| Thermal correction to Energy=            | 0.819478                    |
| Thermal correction to Enthalpy=          | 0.820422                    |
| Thermal correction to Gibbs Free Energy= | 0.697097                    |

Energy at B3LYP/6-311++G(d,p)

HF= -3433.069088

**Name of compound**

C60-L2-N4-H radical

## Cartesian Coordinates optimized at B3LYP/6-31G(d)

|   |             |             |             |
|---|-------------|-------------|-------------|
| C | -0.38136400 | -1.75311200 | -1.25197100 |
| C | 0.29601900  | -1.25379000 | -2.43373100 |
| C | 1.31938100  | -2.00674300 | -3.02330500 |
| C | 1.71372900  | -3.27771500 | -2.43731800 |
| C | 1.06097100  | -3.75777500 | -1.30248100 |
| C | -0.01521100 | -2.98736100 | -0.70138000 |
| C | -0.70896900 | -0.63213100 | -0.41461500 |
| C | -0.47922100 | 0.67828000  | -1.17167100 |
| C | 0.38815900  | 0.17760600  | -2.33039800 |
| C | 1.52758800  | 0.81213600  | -2.76854400 |
| C | 2.50745100  | -1.33740500 | -3.49369000 |
| C | 3.15844000  | -3.38690300 | -2.54579800 |
| C | 3.89294400  | -3.96972300 | -1.51126200 |
| C | 3.21178400  | -4.46996700 | -0.32785500 |
| C | 1.82326600  | -4.36804200 | -0.22665100 |
| C | 1.21344900  | -3.97352100 | 1.03340600  |
| C | 0.07690900  | -3.12282600 | 0.73186000  |
| C | -0.20407900 | -2.01693500 | 1.54175200  |
| C | -0.60748700 | -0.76004400 | 0.95270200  |
| C | 0.12119700  | 1.89152900  | -0.31547100 |
| C | 0.43736300  | 1.48906800  | 1.15550100  |
| C | -0.00303400 | 0.32844900  | 1.75582500  |
| C | 0.75428500  | -0.29092000 | 2.82083900  |
| C | 0.63423300  | -1.73193700 | 2.69198400  |
| C | 1.71819900  | -2.55645500 | 2.99209800  |
| C | 2.01882300  | -3.69631500 | 2.14041600  |
| C | 3.46074600  | -3.80495500 | 2.03495600  |
| C | 4.04674100  | -4.18312600 | 0.82519000  |
| C | 3.64936000  | -2.18392000 | -3.19830700 |
| C | 6.30905500  | -1.28343500 | 0.46501800  |
| C | 6.21210700  | -1.15182000 | -0.92200200 |
| C | 5.81310200  | 0.11432400  | -1.50468200 |
| C | 5.52877700  | 1.20567200  | -0.68034800 |
| C | 5.63078900  | 1.06963600  | 0.76396900  |
| C | 5.33093000  | -0.65108400 | 2.50746700  |
| C | 5.20784600  | -2.09228400 | 2.37816100  |
| C | 5.81327300  | -2.48398200 | 1.11651900  |
| C | 5.24414500  | -3.50695800 | 0.35622700  |
| C | 5.14808500  | -3.37493400 | -1.08784800 |
| C | 5.61919300  | -2.21952400 | -1.71489300 |
| C | 4.96895300  | -0.16919800 | -2.65446500 |
| C | 3.86555500  | 0.64101300  | -2.92303600 |
| C | 3.56444000  | 1.77106600  | -2.06419200 |
| C | 4.38725500  | 2.05293000  | -0.96961700 |
| C | 3.78336400  | 2.43688400  | 0.28319100  |
| C | 4.55040800  | 1.83477400  | 1.36142200  |
| C | 3.89740400  | 1.35649800  | 2.49556900  |
| C | 4.29572100  | 0.08937100  | 3.08264000  |
| C | 4.05337300  | -2.73718400 | 2.82764300  |
| C | 2.97752300  | -1.96862100 | 3.42188400  |
| C | 3.09437400  | -0.58269800 | 3.55058400  |
| C | 1.95973200  | 0.27154900  | 3.25122300  |
| C | 2.45009600  | 1.46219900  | 2.60067200  |

|   |              |             |             |
|---|--------------|-------------|-------------|
| C | 1.70754500   | 2.03193200  | 1.55903100  |
| C | 2.39098000   | 2.52025600  | 0.37530500  |
| C | 1.54988700   | 2.28331800  | -0.76479000 |
| C | 2.12666800   | 1.88943800  | -1.95125400 |
| C | 4.85597800   | -1.61298200 | -2.78799000 |
| C | 2.60984800   | 0.05114400  | -3.35249000 |
| C | 6.01199700   | -0.15103000 | 1.32440200  |
| C | -2.18475700  | 2.98918300  | -0.29870000 |
| C | -2.83324900  | 2.01514000  | 0.47640300  |
| C | -4.22380000  | 1.97564800  | 0.58375300  |
| C | -5.02179800  | 2.91435800  | -0.08082200 |
| C | -4.37779000  | 3.90696700  | -0.84060400 |
| C | -2.99613500  | 3.94267500  | -0.94834000 |
| H | -2.26014300  | 1.28896400  | 1.03565700  |
| H | -4.68182700  | 1.23045700  | 1.22493100  |
| H | -4.97448200  | 4.64561700  | -1.37133300 |
| H | -2.52791700  | 4.71289300  | -1.55193900 |
| N | -0.77578000  | 3.07317300  | -0.47139200 |
| H | -1.43392800  | 1.04619500  | -1.56614700 |
| N | -6.42323700  | 2.94425000  | 0.02762900  |
| H | -6.83951300  | 3.86375900  | -0.02957700 |
| C | -7.32119000  | 1.89965100  | 0.18275500  |
| C | -6.99552500  | 0.54806200  | -0.07146500 |
| C | -8.64392400  | 2.20388400  | 0.58965700  |
| C | -7.94633300  | -0.44696400 | 0.05981500  |
| H | -5.99244100  | 0.28743200  | -0.38934100 |
| C | -9.58488800  | 1.21113600  | 0.73982800  |
| H | -8.90657900  | 3.23825200  | 0.80377300  |
| C | -9.28854700  | -0.15944800 | 0.46105400  |
| H | -7.65619300  | -1.47646800 | -0.11849800 |
| H | -10.59331700 | 1.44477300  | 1.06674200  |
| N | -10.28131400 | -1.05080300 | 0.67308700  |
| C | -10.26117100 | -2.33498300 | 0.17164100  |
| C | -10.91884500 | -3.33323700 | 0.93198100  |
| C | -9.73217000  | -2.70858900 | -1.09035000 |
| C | -10.98832300 | -4.64592700 | 0.48424700  |
| H | -11.35178700 | -3.03982100 | 1.88350500  |
| C | -9.83424600  | -4.02071800 | -1.54297200 |
| H | -9.28961400  | -1.94895400 | -1.72681200 |
| C | -10.44586600 | -5.00117400 | -0.75658100 |
| H | -11.48023600 | -5.39737700 | 1.09683700  |
| H | -9.43791900  | -4.28006400 | -2.52179900 |
| H | -10.51576900 | -6.02505600 | -1.11324700 |
| C | -0.20912100  | 4.38469700  | -0.28427500 |
| C | -0.27571100  | 5.02864800  | 0.95898600  |
| C | 0.39441900   | 5.06143800  | -1.35196800 |
| C | 0.25490300   | 6.30148900  | 1.13591000  |
| H | -0.75329700  | 4.52343300  | 1.79369000  |
| C | 0.93578100   | 6.33171400  | -1.18087500 |
| H | 0.44023200   | 4.58050700  | -2.32397100 |
| C | 0.87614400   | 6.97416200  | 0.06805700  |
| H | 0.18966500   | 6.78476000  | 2.10822700  |
| H | 1.39838100   | 6.83976800  | -2.02399000 |
| N | 1.36215800   | 8.27168100  | 0.22795700  |

|                                          |            |            |                             |
|------------------------------------------|------------|------------|-----------------------------|
| H                                        | 2.08068100 | 8.54780700 | -0.42943700                 |
| H                                        | 1.60560600 | 8.52786100 | 1.17656200                  |
| Frequency and Energy at B3LYP/6-31G(d)   |            |            |                             |
| Zero-point correction=                   |            |            | 0.773866 (Hartree/Particle) |
| Thermal correction to Energy=            |            |            | 0.819333                    |
| Thermal correction to Enthalpy=          |            |            | 0.820277                    |
| Thermal correction to Gibbs Free Energy= |            |            | 0.696753                    |
| Energy at B3LYP/6-311++G(d,p)            |            |            |                             |
| HF= -3433.066735                         |            |            |                             |

| Name of compound                                  |             | C60-L2 cation |             |
|---------------------------------------------------|-------------|---------------|-------------|
| Cartesian Coordinates optimized at B3LYP/6-31G(d) |             |               |             |
| C                                                 | -0.18721000 | -1.65831600   | -1.61497800 |
| C                                                 | 0.57889700  | -1.01436200   | -2.66558400 |
| C                                                 | 1.67334300  | -1.67631000   | -3.23611400 |
| C                                                 | 2.04835800  | -2.99985800   | -2.76466400 |
| C                                                 | 1.31013100  | -3.61907500   | -1.75697500 |
| C                                                 | 0.16539600  | -2.93940600   | -1.17352200 |
| C                                                 | -0.61779000 | -0.64888500   | -0.68748100 |
| C                                                 | -0.35713700 | 0.74654500    | -1.26692800 |
| C                                                 | 0.62444800  | 0.39648800    | -2.39354000 |
| C                                                 | 1.78195000  | 1.09495700    | -2.64595600 |
| C                                                 | 2.88042000  | -0.93797100   | -3.51629900 |
| C                                                 | 3.49928900  | -3.07224400   | -2.75277000 |
| C                                                 | 4.15343600  | -3.75695400   | -1.72719800 |
| C                                                 | 3.38324600  | -4.40184900   | -0.67590300 |
| C                                                 | 1.98913700  | -4.33693300   | -0.69197800 |
| C                                                 | 1.25995200  | -4.10028500   | 0.54324700  |
| C                                                 | 0.13328500  | -3.23784200   | 0.23788700  |
| C                                                 | -0.24953200 | -2.23998800   | 1.13986000  |
| C                                                 | -0.63081800 | -0.93072800   | 0.66069600  |
| C                                                 | 0.14527100  | 1.84930700    | -0.22017000 |
| C                                                 | 0.32908600  | 1.29986500    | 1.21975500  |
| C                                                 | -0.12870700 | 0.06726900    | 1.63385600  |
| C                                                 | 0.54451700  | -0.65774900   | 2.68859400  |
| C                                                 | 0.47392900  | -2.07580500   | 2.38740000  |
| C                                                 | 1.54968300  | -2.90985300   | 2.68771700  |
| C                                                 | 1.95549300  | -3.93891100   | 1.74347700  |
| C                                                 | 3.40311300  | -4.01103400   | 1.76004600  |
| C                                                 | 4.10401000  | -4.23663000   | 0.57383200  |
| C                                                 | 4.01392400  | -1.79426400   | -3.21645900 |
| C                                                 | 6.31015200  | -1.27792100   | 0.75444800  |
| C                                                 | 6.33374900  | -0.98896000   | -0.61157600 |
| C                                                 | 5.95347400  | 0.32851800    | -1.08024600 |
| C                                                 | 5.56948900  | 1.31257500    | -0.16680500 |
| C                                                 | 5.54634600  | 1.01349200    | 1.25572500  |
| C                                                 | 5.13723500  | -0.90192200   | 2.75725400  |
| C                                                 | 5.06465800  | -2.32009200   | 2.45378200  |
| C                                                 | 5.79056100  | -2.55336500   | 1.21678400  |
| C                                                 | 5.31984600  | -3.49095300   | 0.29645600  |
| C                                                 | 5.34949000  | -3.19473300   | -1.12569400 |
| C                                                 | 5.84345600  | -1.96748900   | -1.57162500 |
| C                                                 | 5.22344000  | 0.16607000    | -2.32794200 |

|   |              |             |             |
|---|--------------|-------------|-------------|
| C | 4.12828500   | 0.98342200  | -2.60388600 |
| C | 3.72151000   | 1.99953400  | -1.65160600 |
| C | 4.43440200   | 2.16656400  | -0.46112400 |
| C | 3.71212400   | 2.39552200  | 0.76640400  |
| C | 4.39688800   | 1.68647800  | 1.83509200  |
| C | 3.65881000   | 1.07014100  | 2.84295100  |
| C | 4.03633700   | -0.24996700 | 3.31645500  |
| C | 3.89373600   | -3.03251000 | 2.72013000  |
| C | 2.74919000   | -2.35466500 | 3.29521100  |
| C | 2.81723900   | -0.99163600 | 3.59181700  |
| C | 1.69158300   | -0.12795800 | 3.28613300  |
| C | 2.20560300   | 1.13919300  | 2.82496100  |
| C | 1.54387400   | 1.81720500  | 1.79462200  |
| C | 2.31567000   | 2.44970600  | 0.74142100  |
| C | 1.58830700   | 2.32871800  | -0.49213100 |
| C | 2.27763400   | 2.07559800  | -1.65624400 |
| C | 5.16247600   | -1.25420600 | -2.63432500 |
| C | 2.93288400   | 0.42607800  | -3.21110600 |
| C | 5.90785900   | -0.25735900 | 1.70620000  |
| C | -2.15128700  | 2.97474900  | -0.09836400 |
| C | -2.82668200  | 1.80774000  | 0.35096500  |
| C | -4.20054700  | 1.76736700  | 0.48326200  |
| C | -4.99328000  | 2.89309100  | 0.16950100  |
| C | -4.33125200  | 4.07040000  | -0.25564200 |
| C | -2.96379000  | 4.11236000  | -0.39007800 |
| H | -2.26991400  | 0.93320200  | 0.64774600  |
| H | -4.65927500  | 0.87411400  | 0.89016800  |
| H | -4.91632900  | 4.95035300  | -0.51234600 |
| H | -2.49715400  | 5.02195500  | -0.74445100 |
| N | -0.78223100  | 3.05176100  | -0.25914800 |
| H | -1.28087600  | 1.14564300  | -1.70461900 |
| N | -6.36745900  | 2.92350500  | 0.30063800  |
| H | -6.76520500  | 3.85484900  | 0.35800100  |
| C | -7.29831900  | 1.89271500  | 0.37161900  |
| C | -7.07473600  | 0.60359100  | -0.15641900 |
| C | -8.55321700  | 2.16929500  | 0.95960100  |
| C | -8.05018500  | -0.37393200 | -0.07852800 |
| H | -6.14247200  | 0.37486200  | -0.65863000 |
| C | -9.52752500  | 1.19818500  | 1.03617000  |
| H | -8.74858200  | 3.15689200  | 1.37031900  |
| C | -9.30336800  | -0.10395600 | 0.52153300  |
| H | -7.84499000  | -1.35868700 | -0.47932000 |
| H | -10.48486200 | 1.43421100  | 1.49339400  |
| N | -10.29852800 | -1.04176800 | 0.64855000  |
| H | -11.04605300 | -0.79962800 | 1.28691400  |
| C | -10.40929400 | -2.32002100 | 0.05225200  |
| C | -10.97864100 | -3.35719200 | 0.80579800  |
| C | -10.02900900 | -2.55458600 | -1.27765700 |
| C | -11.15001100 | -4.61774400 | 0.23965400  |
| H | -11.27371400 | -3.17412500 | 1.83604000  |
| C | -10.19074700 | -3.82491100 | -1.82844600 |
| H | -9.64532000  | -1.74222400 | -1.88579700 |
| C | -10.74832400 | -4.86046000 | -1.07602100 |
| H | -11.59139600 | -5.41380700 | 0.83188500  |

|                                          |              |             |                    |
|------------------------------------------|--------------|-------------|--------------------|
| H                                        | -9.89799400  | -3.99788700 | -2.85998000        |
| H                                        | -10.87820900 | -5.84527200 | -1.51394200        |
| C                                        | -0.19230700  | 4.36709300  | -0.28616500        |
| C                                        | -0.13180200  | 5.12800100  | 0.88943700         |
| C                                        | 0.29803300   | 4.91629000  | -1.47805200        |
| C                                        | 0.42080100   | 6.40119400  | 0.88117800         |
| H                                        | -0.50857800  | 4.70806000  | 1.81753700         |
| C                                        | 0.84548300   | 6.19159600  | -1.49436300        |
| H                                        | 0.24469200   | 4.34125700  | -2.39713200        |
| C                                        | 0.92216700   | 6.95912200  | -0.31297600        |
| H                                        | 0.46942400   | 6.97444600  | 1.80331000         |
| H                                        | 1.21447200   | 6.60713600  | -2.42836300        |
| N                                        | 1.42376900   | 8.24356800  | -0.33751100        |
| H                                        | 2.01249900   | 8.50109600  | -1.11774100        |
| H                                        | 1.71546000   | 8.64862500  | 0.54142300         |
| Frequency and Energy at B3LYP/6-31G(d)   |              |             |                    |
| Zero-point correction=                   |              | 0.788366    | (Hartree/Particle) |
| Thermal correction to Energy=            |              | 0.833953    |                    |
| Thermal correction to Enthalpy=          |              | 0.834898    |                    |
| Thermal correction to Gibbs Free Energy= |              | 0.711251    |                    |
| Energy at B3LYP/6-311++G(d,p)            |              |             |                    |
| HF= -3433.493314                         |              |             |                    |

| Name of compound                                  | C60-L2 anion |             |             |
|---------------------------------------------------|--------------|-------------|-------------|
| Cartesian Coordinates optimized at B3LYP/6-31G(d) |              |             |             |
| C                                                 | 0.30205400   | -1.95155900 | 0.92267700  |
| C                                                 | -0.24767200  | -1.49865000 | 2.17995200  |
| C                                                 | -1.26913800  | -2.23557800 | 2.81157600  |
| C                                                 | -1.78970400  | -3.43864800 | 2.17362000  |
| C                                                 | -1.25793200  | -3.87519400 | 0.96028300  |
| C                                                 | -0.18085500  | -3.13321200 | 0.32264300  |
| C                                                 | 0.61710800   | -0.80040900 | 0.12776200  |
| C                                                 | 0.52421400   | 0.47114000  | 0.97749500  |
| C                                                 | -0.27293600  | -0.06213500 | 2.17387000  |
| C                                                 | -1.33550300  | 0.60306300  | 2.74352000  |
| C                                                 | -2.37471500  | -1.54028300 | 3.40852600  |
| C                                                 | -3.22237100  | -3.49165900 | 2.40375300  |
| C                                                 | -4.07542900  | -3.97865900 | 1.39658200  |
| C                                                 | -3.52383600  | -4.43100600 | 0.13815900  |
| C                                                 | -2.13669700  | -4.38550500 | -0.07994600 |
| C                                                 | -1.61410100  | -3.93600100 | -1.35284700 |
| C                                                 | -0.40651600  | -3.16179900 | -1.09569400 |
| C                                                 | -0.13264800  | -2.02269800 | -1.86727200 |
| C                                                 | 0.39531400   | -0.82746500 | -1.23414700 |
| C                                                 | -0.08107500  | 1.76143800  | 0.24726700  |
| C                                                 | -0.53215400  | 1.48213200  | -1.21311200 |
| C                                                 | -0.20690200  | 0.33496700  | -1.91199900 |
| C                                                 | -1.08714300  | -0.18241900 | -2.94507200 |
| C                                                 | -1.02939800  | -1.62682500 | -2.92789900 |
| C                                                 | -2.19359600  | -2.38269400 | -3.18783800 |
| C                                                 | -2.48639000  | -3.54586700 | -2.37718600 |
| C                                                 | -3.92314400  | -3.59530300 | -2.15359300 |
| C                                                 | -4.42785900  | -4.02518900 | -0.92346200 |



|   |             |             |             |
|---|-------------|-------------|-------------|
| C | -3.58696100 | -2.30978900 | 3.15686600  |
| C | -6.48640300 | -1.03997800 | -0.20172400 |
| C | -6.26751200 | -1.00849600 | 1.17914900  |
| C | -5.74464000 | 0.19586800  | 1.80792700  |
| C | -5.46922500 | 1.32208200  | 1.02080500  |
| C | -5.70202900 | 1.29225000  | -0.40734600 |
| C | -5.65142900 | -0.32600100 | -2.27361800 |
| C | -5.59196600 | -1.77717100 | -2.24371000 |
| C | -6.11481100 | -2.22211300 | -0.96232100 |
| C | -5.54508500 | -3.32092000 | -0.31641800 |
| C | -5.32144900 | -3.28943100 | 1.11982700  |
| C | -5.67600700 | -2.15099000 | 1.85064700  |
| C | -4.84166100 | -0.19944100 | 2.86705200  |
| C | -3.66213500 | 0.54330500  | 3.09471800  |
| C | -3.36921500 | 1.69652400  | 2.27523300  |
| C | -4.25654700 | 2.09130200  | 1.26493500  |
| C | -3.74070200 | 2.53462600  | -0.00042600 |
| C | -4.62483400 | 2.03015900  | -1.04267900 |
| C | -4.09192000 | 1.59489100  | -2.25471200 |
| C | -4.61344900 | 0.39534600  | -2.89002400 |
| C | -4.51562900 | -2.45162500 | -2.82571900 |
| C | -3.44108100 | -1.70346600 | -3.46047500 |
| C | -3.49725100 | -0.30266900 | -3.48896500 |
| C | -2.29139500 | 0.47399200  | -3.23102700 |
| C | -2.65519300 | 1.64778100  | -2.48492000 |
| C | -1.79538000 | 2.11663300  | -1.47083400 |
| C | -2.35122100 | 2.55528000  | -0.21046300 |
| C | -1.44028000 | 2.19826300  | 0.83906000  |
| C | -1.93646400 | 1.75471100  | 2.04614800  |
| C | -4.79099500 | -1.64624700 | 2.89051000  |
| C | -2.41758200 | -0.13781000 | 3.36731800  |
| C | -6.20405800 | 0.12703800  | -1.01701100 |
| C | 2.25276400  | 2.80672000  | 0.00447900  |
| C | 2.78234600  | 1.77043900  | -0.78747000 |
| C | 4.13741000  | 1.72216600  | -1.11437400 |
| C | 5.02993100  | 2.69764700  | -0.65721700 |
| C | 4.51073500  | 3.73713100  | 0.12835200  |
| C | 3.16109900  | 3.79535000  | 0.44744200  |
| H | 2.13879400  | 1.00170200  | -1.18895300 |
| H | 4.49168600  | 0.92707600  | -1.76337100 |
| H | 5.18009500  | 4.50766200  | 0.50718900  |
| H | 2.80032700  | 4.61121900  | 1.06325500  |
| N | 0.89770100  | 2.89906500  | 0.38737100  |
| H | 1.52551800  | 0.76882300  | 1.31204600  |
| N | 6.39669400  | 2.70952100  | -1.01926300 |
| H | 6.81612200  | 3.62773000  | -1.06072400 |
| C | 7.30754600  | 1.65577400  | -0.97593600 |
| C | 7.00026000  | 0.38042400  | -0.46588300 |
| C | 8.61317300  | 1.87018500  | -1.45896000 |
| C | 7.95409400  | -0.63336500 | -0.45765800 |
| H | 6.00754300  | 0.17926000  | -0.08013100 |
| C | 9.57241800  | 0.86629700  | -1.40921700 |
| H | 8.87651000  | 2.84419400  | -1.86701200 |
| C | 9.26108600  | -0.40835300 | -0.91434000 |

|                                          |             |             |                             |
|------------------------------------------|-------------|-------------|-----------------------------|
| H                                        | 7.67669100  | -1.61780000 | -0.09361900                 |
| H                                        | 10.58048100 | 1.07022000  | -1.76465100                 |
| N                                        | 10.23402400 | -1.43329500 | -0.95369000                 |
| H                                        | 10.87853300 | -1.38855600 | -1.73017100                 |
| C                                        | 10.59666700 | -2.31416900 | 0.06214000                  |
| C                                        | 11.53984600 | -3.32183900 | -0.22519000                 |
| C                                        | 10.07700300 | -2.23966700 | 1.36816500                  |
| C                                        | 11.94498000 | -4.22005200 | 0.75642600                  |
| H                                        | 11.94695100 | -3.39546200 | -1.23217600                 |
| C                                        | 10.48582500 | -3.15284100 | 2.33857200                  |
| H                                        | 9.36718900  | -1.46069000 | 1.62207400                  |
| C                                        | 11.41901700 | -4.14982700 | 2.04911100                  |
| H                                        | 12.67459400 | -4.98629400 | 0.50467000                  |
| H                                        | 10.06914900 | -3.07368100 | 3.33992800                  |
| H                                        | 11.72892500 | -4.85755200 | 2.81250700                  |
| C                                        | 0.36829300  | 4.23011400  | 0.50279500                  |
| C                                        | 0.22413300  | 5.04684300  | -0.62643700                 |
| C                                        | 0.00026500  | 4.74933400  | 1.74969300                  |
| C                                        | -0.28624600 | 6.33656000  | -0.51776700                 |
| H                                        | 0.50637200  | 4.65554500  | -1.59927300                 |
| C                                        | -0.51775300 | 6.03653700  | 1.86505300                  |
| H                                        | 0.10975600  | 4.12624600  | 2.63142500                  |
| C                                        | -0.67490100 | 6.84835500  | 0.73088600                  |
| H                                        | -0.39785400 | 6.95190700  | -1.40838300                 |
| H                                        | -0.80545300 | 6.41800300  | 2.84263500                  |
| N                                        | -1.15483800 | 8.16395100  | 0.84974000                  |
| H                                        | -1.76470500 | 8.30101000  | 1.64795100                  |
| H                                        | -1.60100500 | 8.50882400  | 0.00716600                  |
| Frequency and Energy at B3LYP/6-31G(d)   |             |             |                             |
| Zero-point correction=                   |             |             | 0.782142 (Hartree/Particle) |
| Thermal correction to Energy=            |             |             | 0.828674                    |
| Thermal correction to Enthalpy=          |             |             | 0.829619                    |
| Thermal correction to Gibbs Free Energy= |             |             | 0.702837                    |
| Energy at B3LYP/6-311++G(d,p)            |             |             |                             |
| HF= -3433.797526                         |             |             |                             |
